# Supplementary material for: Topobexin targets the Topoisomerase II ATPase domain for beta isoform-selective inhibition and anthracycline cardioprotection
Source: Springer Nature journal article supplement (doi:10.1038/s41467-025-60167-9), 2025-05-28
Supplement: MOESM1 [file 41467_2025_60167_MOESM1_ESM.pdf]

Supplementary Information for

## Topobexin Targets the Topoisomerase II ATPase Domain for Beta Isoform- Selective Inhibition and Anthracycline Cardioprotection

**Authors:** Jan Kubeš<sup>1\*</sup>, Galina Karabanovich<sup>2\*</sup>, Anh T.Q. Cong<sup>3,4\*</sup>, Iuliia Melnikova<sup>2</sup>, Olga Lenčová<sup>5</sup>, Petra Kollárová<sup>5</sup>, Hana Bavlovič Piskáčková<sup>6</sup>, Veronika Keresteš<sup>1</sup>, Lenka Applová<sup>1</sup>, Lise C.M. Arrouye<sup>3</sup>, Julia R. Alvey<sup>3</sup>, Jasmina Paluncic<sup>3</sup>, Taylor L. Witter<sup>3,4</sup>, Anna Jirkovská<sup>1</sup>, Jiří Kuneš<sup>2</sup>, Petra Štěrbová-Kovaříková<sup>6</sup>, Caroline A. Austin<sup>7†</sup>, Martin Štěrba<sup>5†</sup>, Tomáš Šimůnek<sup>1†</sup>, Jaroslav Roh<sup>2†</sup>, and Matthew J. Schellenberg<sup>3†</sup>

\*Contributed equally

†Correspondence and requests for materials should be addressed to: schellenberg.matthew@mayo.edu, rohj@faf.cuni.cz, simunek@faf.cuni.cz, sterbam@lfhk.cuni.cz or caroline.austin@newcastle.ac.uk

### The PDF file includes:

Supplementary Figs. 1 to 8

Supplementary Tables 1 to 5

Supplementary Methods – Chemistry (Synthetic procedures and characterization of compounds)

|          |     | ● obex interacting residues                                             | ● dexrazoxane interacting residues |     |
|----------|-----|-------------------------------------------------------------------------|------------------------------------|-----|
| TOP2B_Hs | 1   | MAKSGGCGAGAGVGGNGALTWVNNAAKKEESETANKNDSSKKLSVERVYQKKTQLEHILLRPDITYIGSV  |                                    | 70  |
| TOP2B_Oc | 1   | MAKSG- GGGGAGAGAGGALTWVNNAAKKEESETASKNDTSKKLSVERVYQKKTQLEHILLRPDITYIGSV |                                    | 69  |
| TOP2B_Rn | 1   | -----MAKSSLAGVDGALTWVNNAAKKEELETANKNDSSKKLSVERVYQKKTQLEHILLRPDITYIGSV   |                                    | 63  |
| TOP2B_Mm | 1   | -----MAKSSLAGSDGALTWVNNAATKKEELETANKNDSTKKLSVERVYQKKTQLEHILLRPDITYIGSV  |                                    | 63  |
| TOP2A_Hs | 1   | -----MEVSPLOPVNE---NMQVNIKKKEDAKKRLSVERIYQKKTQLEHILLRPDITYIGSV          |                                    | 54  |
| TOP2A_Oc | 1   | -----MEVSPLOPVNE---NMQMNKIKKEDAKKRLSIERIYQKKTQLEHILLRPDITYIGSV          |                                    | 54  |
| TOP2A_Rn | 1   | -----MELSPLQPVNE---NMLLNK- KKNEDGKKRLSVERIYQKKTQLEHILLRPDITYIGSV        |                                    | 53  |
| TOP2A_Mm | 1   | -----MELSPLQPVNE---NMLMNK- KKNEDGKKRLSIERIYQKKTQLEHILLRPDITYIGSV        |                                    | 53  |
| TOP2B_Hs | 71  | EPLTQFMWVYDEDVGMNCREVTFVPGLYKIFDEILVNAADNKQDKNMTICKVSIDPESNIISIWNNGKG   |                                    | 140 |
| TOP2B_Oc | 70  | EPLTQLMWVYDEEVGMNCREVTFVPGLYKIFDEILVNAADNKQDKNMTICKISIDPESNIISIWNNGKG   |                                    | 139 |
| TOP2B_Rn | 64  | EPLTQLMWVYDEDVGMNCREVTFVPGLYKIFDEILVNAADNKQDKNMTICKVSIDPESNIISIWNNGKG   |                                    | 133 |
| TOP2B_Mm | 64  | EPLTQLMWVYDEDVGMNCREVTFVPGLYKIFDEILVNAADNKQDKNMTICKVSIDPESNIISIWNNGKG   |                                    | 133 |
| TOP2A_Hs | 55  | ELVTQOMWVYDEDVGINYREVTFVPGLYKIFDEILVNAADNKQDKPMSCIRVTIDPENNLISIWNNGKG   |                                    | 124 |
| TOP2A_Oc | 55  | ELVTQOMWVYDEDVGINYREVTFVPGLYKIFDEILVNAADNKQDKPMSCIRVTIDPENNLISIWNNGKG   |                                    | 124 |
| TOP2A_Rn | 54  | ELVTQOMWVYDEDVGINYREVTFVPGLYKIFDEILVNAADNKQDKPMSCIRVTMM-RNNLISIWNNGKG   |                                    | 122 |
| TOP2A_Mm | 54  | ELVTQOMWVYDEDVGINYREVTFVPGLYKIFDEILVNAADNKQDKPMSCIRVTIDPENNLISIWNNGKG   |                                    | 123 |
| TOP2B_Hs | 141 | IPVVEHKVEKVVYPALIFGQLLTSSNYDDDEKKVTGGRNGYGAKLCNIFSTKFTVETACKEYKHSFKQTW  |                                    | 210 |
| TOP2B_Oc | 140 | IPVVEHKVEKVVYPALIFGQLLTSSNYDDDEKKVTGGRNGYGAKLCNIFSTKFTVETACKEYKHSFKQTW  |                                    | 209 |
| TOP2B_Rn | 134 | IPVVEHKVEKVVYPALIFGQLLTSSNYDDDEKKVTGGRNGYGAKLCNIFSTKFTVETACKEYKHSFKQTW  |                                    | 203 |
| TOP2B_Mm | 134 | IPVVEHKVEKVVYPALIFGQLLTSSNYDDDEKKVTGGRNGYGAKLCNIFSTKFTVETACKEYKHSFKQTW  |                                    | 203 |
| TOP2A_Hs | 125 | IPVVEHKVEKMYVPALIFGQLLTSSNYDDDEKKVTGGRNGYGAKLCNIFSTKFTVETASREYKMMFKQTW  |                                    | 194 |
| TOP2A_Oc | 125 | IPVVEHKVEKMYVPALIFGQLLTSSNYDDDEKKVTGGRNGYGAKLCNIFSTKFTVETASREYKMMFKQTW  |                                    | 194 |
| TOP2A_Rn | 123 | IPVVEHKVEKMYVPALIFGQLLTSSNYDDDEKKVTGGRNGYGAKLCNIFSTKFTVETASREYKMMFKQTW  |                                    | 192 |
| TOP2A_Mm | 124 | IPVVEHKVEKIYVPALIFGQLLTSSNYDDDEKKVTGGRNGYGAKLCNIFSTKFTVETASREYKMMFKQTW  |                                    | 193 |
| TOP2B_Hs | 211 | MNNMMKTSEAKIKHFDGEDYTCITFPDLSKFKMEKLDKDIVALMTRRAYDLAGSCRGVKVMFNGKKLPV   |                                    | 280 |
| TOP2B_Oc | 210 | MNNMMKTSEAKIKHFDGEDYTCITFPDLAKFKMEKLDKDIVALMTRRAYDLAGSCRGVKVMFNGKKLPV   |                                    | 279 |
| TOP2B_Rn | 204 | MNNMMKTSEAKIKHFDGEDYTCITFPDLAKFKMEKLDKDIVALMTRRAYDLAGSCRGVKVMFNGKKLPV   |                                    | 273 |
| TOP2B_Mm | 204 | MNNMMKTSEAKIKHFDGEDYTCITFPDLSKFKMEKLDKDIVALMTRRAYDLAGSCRGVKVMFNGKKLPV   |                                    | 273 |
| TOP2A_Hs | 195 | MDNMGRAGEMELKSPFNGEDYTCITFPDLSKFKMQSLDKDIVALMVRRAYDIAGSTKDVKVFNLNGKLPV  |                                    | 264 |
| TOP2A_Oc | 195 | MDNMGRAGEMELKSPFNGEDYTCITFPDLSKFKMQSLDKDIVALMVRRAYDIAGSTKDVKVFNLNGKLPV  |                                    | 264 |
| TOP2A_Rn | 193 | MDNMGRAGDMELKSPFNGEDYTCITFPDLSKFKMQSLDKDIVALMVRRAYDIAGSTKDVKVFNLNGRLPV  |                                    | 262 |
| TOP2A_Mm | 194 | MDNMGRAGDMELKSPFNGEDYTCITFPDLSKFKMQSLDKDIVALMVRRAYDIAGSTKDVKVFNLNGNSLPV |                                    | 263 |
| TOP2B_Hs | 281 | NGFRSYVDLYVKDKLDETGVALKVIEHLANERWDVCLTLSEKGFQOISFVNSIATTKGGRHVDYVVDQVV  |                                    | 350 |
| TOP2B_Oc | 280 | NGFRSYVDLYVKDKLDETGVALKVIEHLANERWDVCLTLSEKGFQOISFVNSIATTKGGRHVDYVVDQVV  |                                    | 349 |
| TOP2B_Rn | 274 | NGFRSYVDLYVKDKLDETGVALKVIEHLANERWDVCLTLSEKGFQOISFVNSIATTKGGRHVDYVVDQVV  |                                    | 343 |
| TOP2B_Mm | 274 | NGFRSYVDLYVKDKLDETGVALKVIEHLANERWDVCLTLSEKGFQOISFVNSIATTKGGRHVDYVVDQVV  |                                    | 343 |
| TOP2A_Hs | 265 | KGFRSYVDMYLKDKLDETGNLSKVIEHQVNRWEVCLTMSEKGFQOISFVNSIATSKGGRHVDYVADQIV   |                                    | 334 |
| TOP2A_Oc | 265 | KGFRSYVDMYLKDKVDETGNPLKVIEHQVNRWEVCLTMSEKGFQOISFVNSIATSKGGRHVDYVADQIV   |                                    | 334 |
| TOP2A_Rn | 263 | KGFRSYVDMYLKDKVDETGNALKVIEHQVNRWEVCLTMSEKGFQOISFVNSIATSKGGRHVDYVADQIV   |                                    | 332 |
| TOP2A_Mm | 264 | KGFRSYVDLYLKDVKDETGNLSKVIEHQVNRWEVCLTMSEKGFQOISFVNSIATSKGGRHVDYVADQIV   |                                    | 333 |
| TOP2B_Hs | 351 | GKLEIVVKKKNKAGVSVKPFQVKNHIWVFINCLINPTFDSQTKENMTLPKSPFGSKCOLSEKFFKAASN   |                                    | 420 |
| TOP2B_Oc | 350 | GKLEIVVKKKNKAGVSVKPFQVKNHIWVFINCLINPTFDSQTKENMTLPKSPFGSKCOLSEKFFKAASN   |                                    | 419 |
| TOP2B_Rn | 344 | GKLEIVVKKKNKAGVSVKPFQVKNHIWVFINCLINPTFDSQTKENMTLPKSPFGSKCOLSEKFFKAASN   |                                    | 413 |
| TOP2B_Mm | 344 | SKLEIVVKKKNKAGVSVKPFQVKNHIWVFINCLINPTFDSQTKENMTLPKSPFGSKCOLSEKFFKAASN   |                                    | 413 |
| TOP2A_Hs | 335 | TKLVDVVKKKNKGGVAVKAHQVKNHMIWIFVNALINPTFDSQTKENMTLPKSPFGSTCOLSEKFIKAAIG  |                                    | 404 |
| TOP2A_Oc | 335 | AKLVDVVKKKNKGGVAVKAHQVKNHMIWIFVNALINPTFDSQTKENMTLQAKSFGSTCOLSEKFIKAAIG  |                                    | 404 |
| TOP2A_Rn | 333 | SKLVDVVKKKNKGGVAVKADQVKNHMIWIFGNAVINPTFDSQTKENMTLQAKSFGSTCOLSEKFIKAAIG  |                                    | 402 |
| TOP2A_Mm | 334 | SKLVDVVKKKNKGGVAVKAHQVKNHMIWIFVNALINPTFDSQTKENMTLQAKSFGSTCOLSEKFIKAAIG  |                                    | 403 |
| TOP2B_Hs | 421 | CGIVESILNWVKFKAQTOLNKKCSSVKYSKIKGIPKLLDANDAGGKHSLECTLILTEGDSA           |                                    | 481 |
| TOP2B_Oc | 420 | CGIVESILNWVKFKAQTOLNKKCSSVKYSKIKGIPKLLDANDAGGKHSLECTLILTEGDSA           |                                    | 480 |
| TOP2B_Rn | 414 | CGIVESILNWVKFKAQTOLNKKCSSVKYSKIKGIPKLLDANDAGGKHSLECTLILTEGDSA           |                                    | 474 |
| TOP2B_Mm | 414 | CGIVESILNWVKFKAQTOLNKKCSSVKYSKIKGIPKLLDANDAGGKHSLECTLILTEGDSA           |                                    | 474 |
| TOP2A_Hs | 405 | CGIVESILNWVKFKAQVQLNKKCSAVKHNRKIGIPKLLDANDAGGRNSTECTLILTEGDSA           |                                    | 465 |
| TOP2A_Oc | 405 | CGIVESILNWVKFKAQVQLNKKCSAVKHNRKIGIPKLLDANDAGSRNSAECTLILTEGDS-           |                                    | 464 |
| TOP2A_Rn | 403 | CGIVESILNWVKFKAQIQLNKKCSAVKHNRKIGIPKLLDANDAGSRNSAECTLILTEGDSA           |                                    | 463 |
| TOP2A_Mm | 404 | CGIVESILNWVKFKAQIQLNKKCSAVKHNRKIGIPKLLDANDAGSRNSTECTLILTEGDSA           |                                    | 464 |

**Supplementary Fig. 1. Sequence alignment of TOP2A and TOP2B ATPase domains from species used in this study.** Hs, Homo sapiens; Oc, Oryctolagus cuniculus; Rn Rattus norvegicus; Ms, Mus musculus. Residues that comprise the obex (pink) and dexrazoxane (teal) binding sites are indicated.

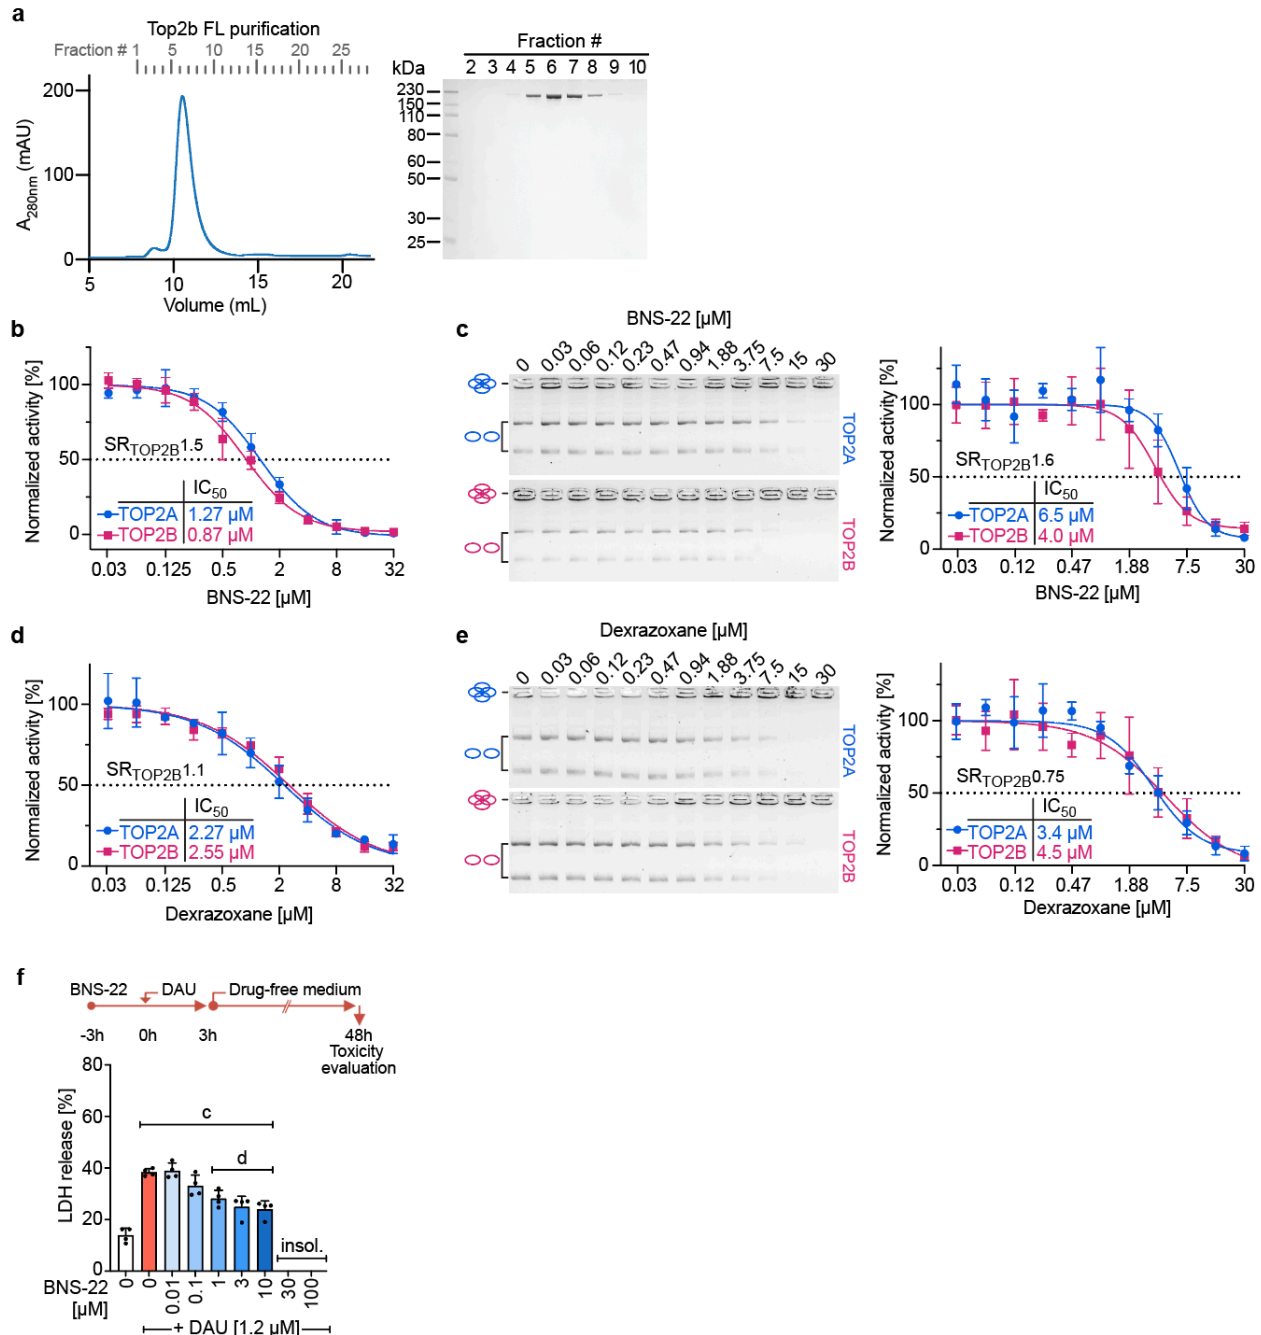

**Supplementary Fig. 2.** **a**, Final size-exclusion purification of recombinant TOP2B from YFP-tag HEK293F cell expression system. **b**, Inhibition of ATPase activity of recombinant human TOP2A and TOP2B by BNS22 ( $n=3$ , mean  $\pm$  SD normalized to untreated control). **c**, Inhibition of decatenation activity of recombinant human TOP2A and TOP2B by BNS22 ( $n=3$ , mean  $\pm$  SD normalized to untreated control). Representative agarose gel is shown (right). **d**, Inhibition of ATPase activity of recombinant human TOP2A and TOP2B by dexrazoxane ( $n=3$ , mean  $\pm$  SD normalized to untreated control). **e**, Inhibition of decatenation activity of recombinant human TOP2A and TOP2B by dexrazoxane ( $n=3$ , mean  $\pm$  SD normalized to untreated control). Representative agarose gel is shown (right). **f**, Protective effects of BNS-22 against toxicity (LDH release) induced by DAU [1.2  $\mu$ M] in isolated rat neonatal ventricular cardiomyocytes (NVCM) 48 h after DAU addition,  $n=4$ , mean  $\pm$  SD. Statistical significance ( $P \leq 0.05$ , one-way ANOVA) against untreated cells in column 1 is indicated as (c) or DAU treated cells in column 2 indicated as (d).



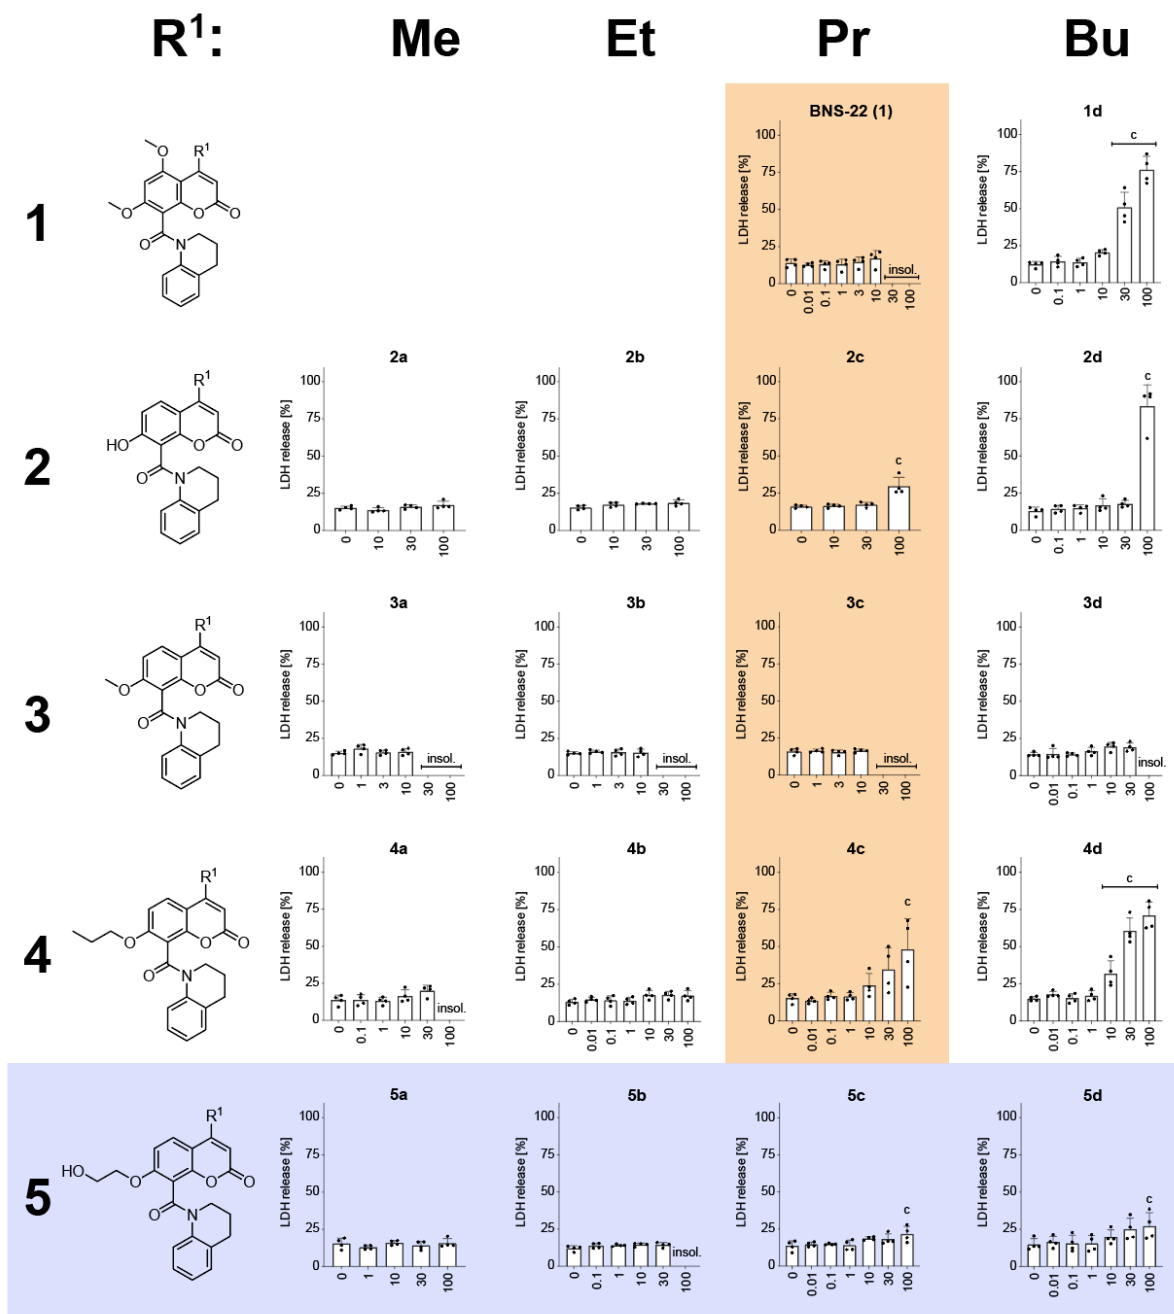

**Supplementary Fig. 4. Inherent toxicities of the first series of the novel compounds in primary cultures of rat cardiomyocytes in settings corresponding to the cardioprotection model experiments.** Cells were treated with the indicated compound (or vehicle for controls; DMSO 0.1 % final concentration) for 6 h, and then left in drug-free media for 45 h. Cellular toxicity was evaluated by LDH release, n = 4, mean  $\pm$  SD. Statistical significance ( $P \leq 0.05$ , one-way ANOVA) against untreated cells in column 1 indicated as (c). Compounds in colored rectangles were selected for more detailed investigation as representatives of two axes of structural modifications.

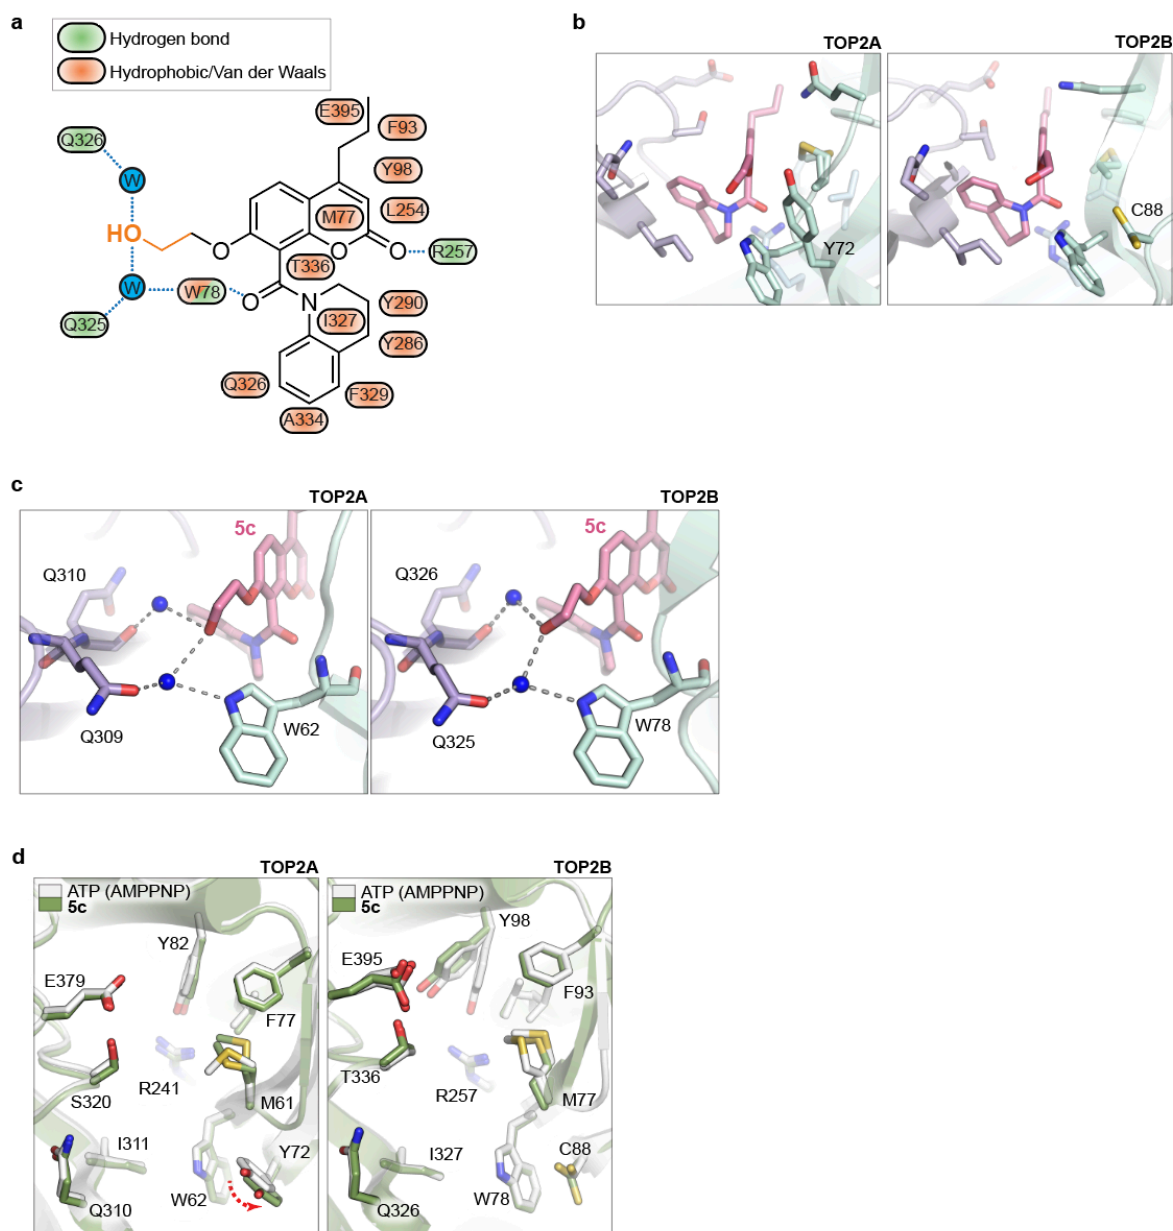

**Supplementary Fig. 5. a**, Diagram depicting residues of TOP2B that interact with compound **5c**. Residues are colored coded according to the type of interaction (hydrogen bonding or hydrophobic/Van der Waals). **b**, The position 7 hydroxyl group of compound **5c** extends towards the non-conserved Y72/C88 residue. **c**, The position 7 hydroxyl group of **5c** forms hydrogen bonds with ordered water molecules in both TOP2A and TOP2B. **d**, Alignment of the structures of TOP2A and TOP2B with or without **5c** showing similarities between the bound and unbound states.

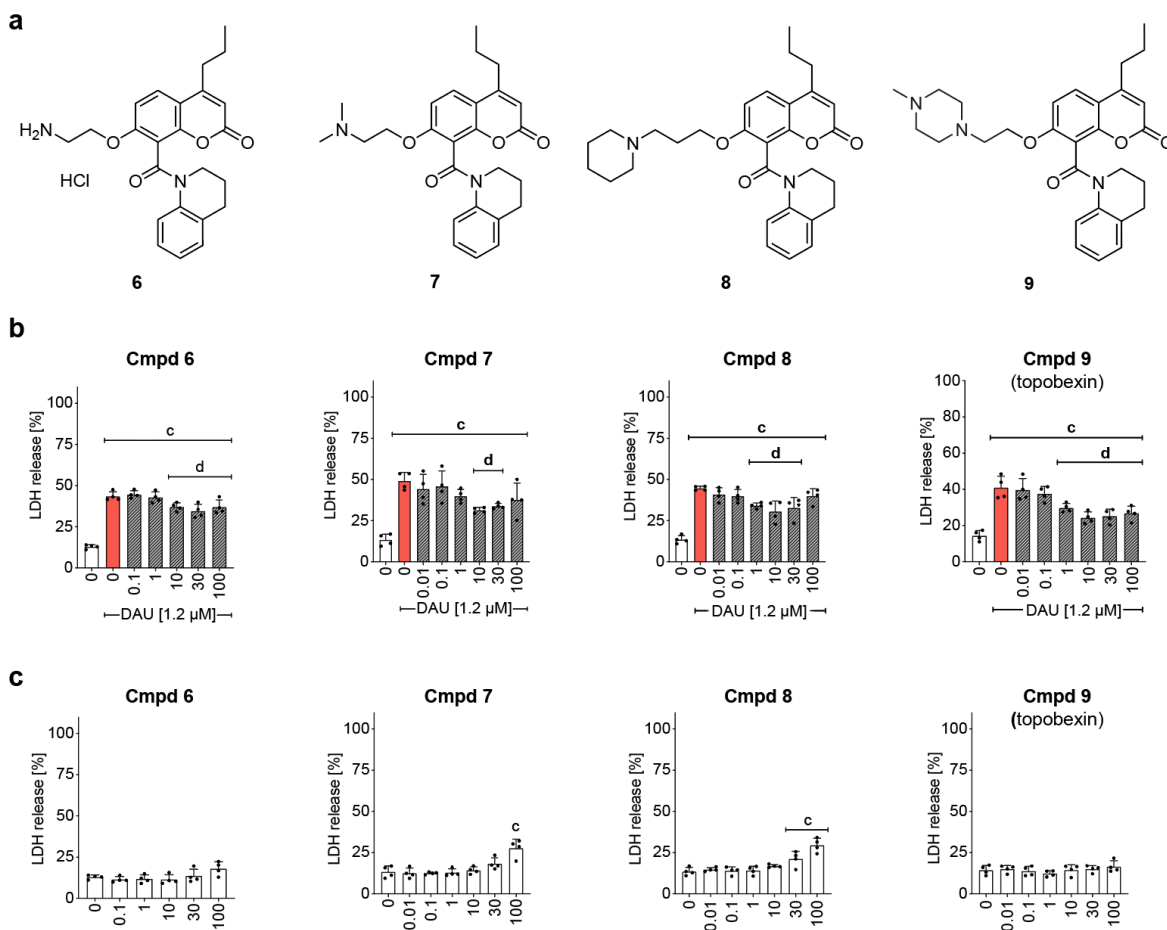

**Supplementary Fig. 6. a**, Chemical structures of analogues containing nitrogen in a side chain in position 7. **b**, Protective effects against DAU-induced cytotoxicity and **c**, corresponding inherent toxicities of derivatives based on **5c** designed for improved solubility and administrability. Cellular toxicity was evaluated by LDH release,  $n = 4$ , mean  $\pm$  SD. Statistical significance ( $P \leq 0.05$ , one-way ANOVA) against untreated cells indicated as (c) or DAU treated cells indicated as (d). Data shown in panel B and C for topobexin (**9**) is reproduced from Fig. 4B.



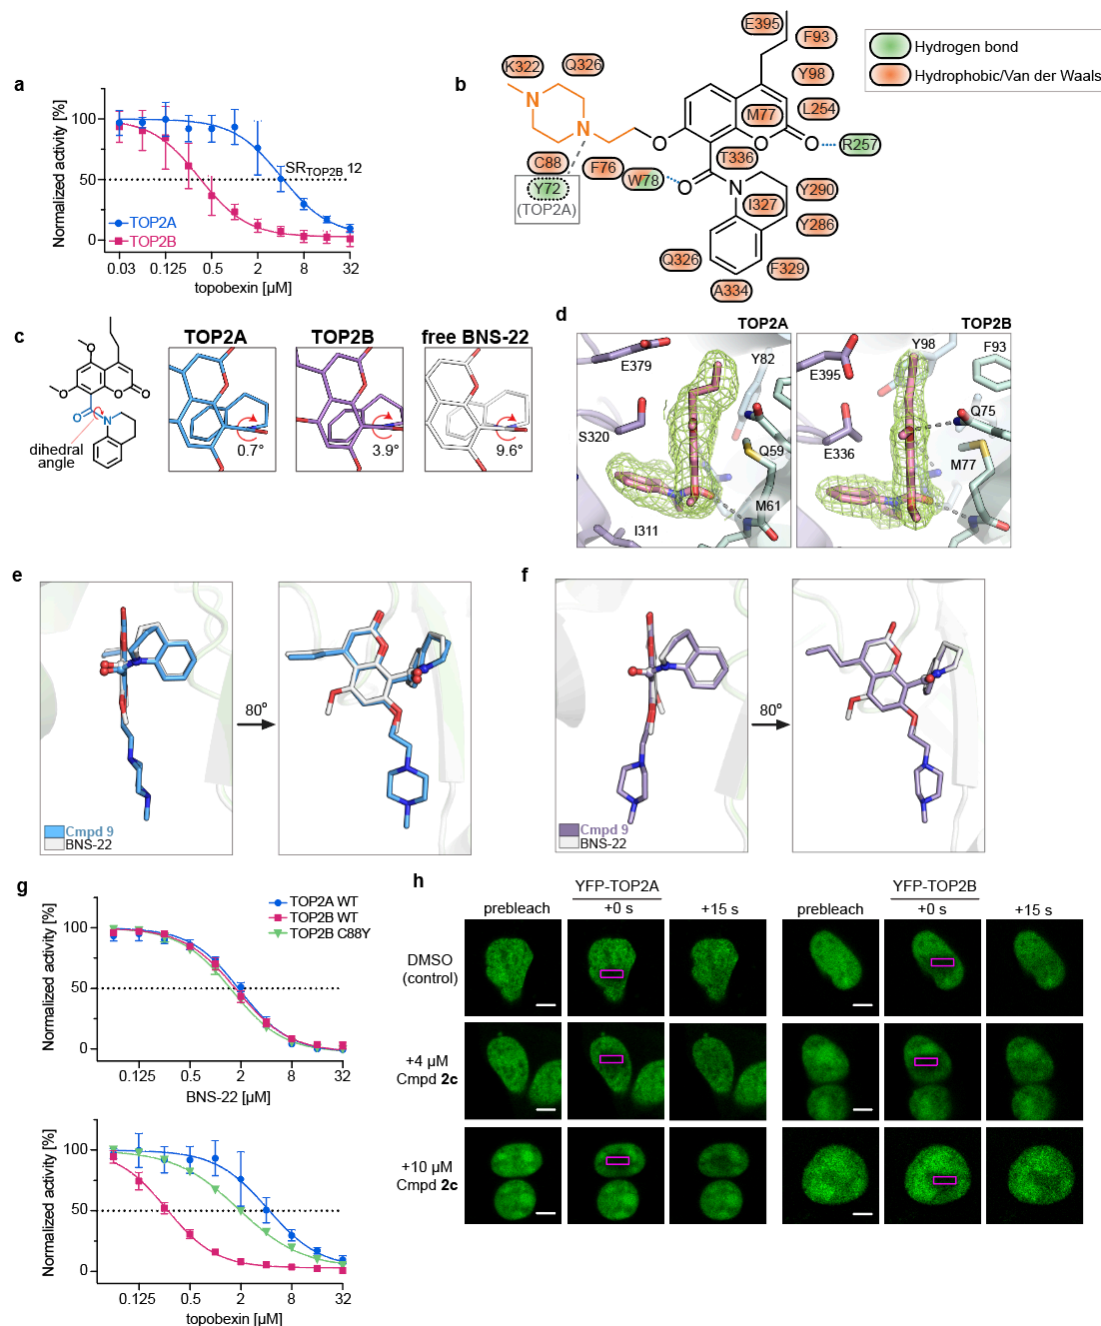



comparison. The IC<sub>50</sub> values of TOP2B C88Y mutant were 1.55  $\mu$ M for BNS-22 and 1.88  $\mu$ M for topobexin (**9**). **h**, Fluorescence Recovery After Photobleaching (FRAP) analysis. HEK293F cells that express yellow-fluorescent protein (YFP)-TOP2A or YFP-TOP2B were pre-incubated with or without compound **2c** for 15 min prior to FRAP analysis. YFP-TOP2 in the bleached area (purple box) rapidly mixes throughout the nucleus and the bleached area is no longer visible after 20 seconds in untreated cells. When inhibited by compound **2c** the bleached area is still visible after 20 seconds for both YFP-TOP2B and YFP-TOP2A.

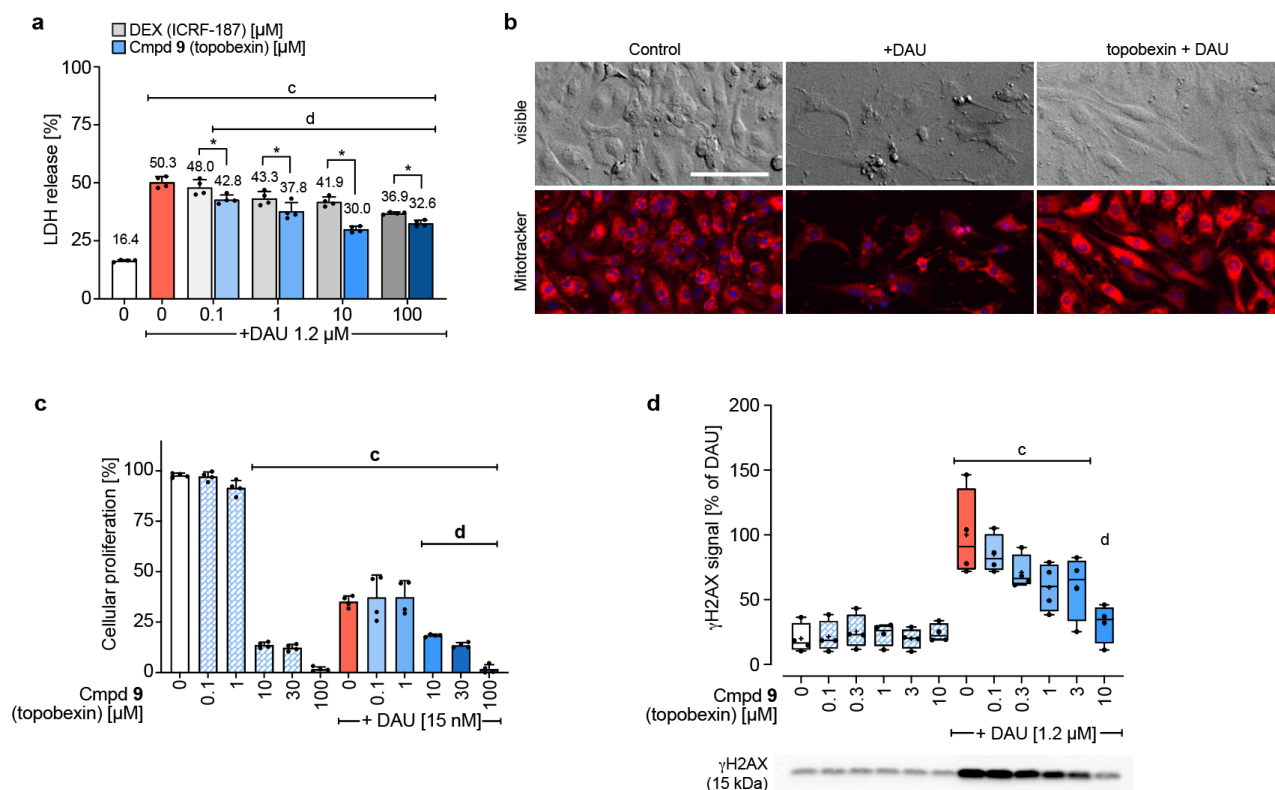

**Supplementary Fig. 8. a**, Side-by-side comparison of protective effects of dexrazoxane (ICRF-187) and topobexin (**9**) in isolated rat neonatal ventricular cardiomyocytes (NVCM) against toxicity (LDH release) induced by DAU [1.2  $\mu$ M] 48 h after DAU addition,  $n = 4$ , mean  $\pm$  SD. Statistical significance ( $P \leq 0.05$ ): one-way ANOVA against untreated cells in column 1 indicated as (c) or against DAU treated cells in column 2 indicated as (d), or pairwise comparison in same concentrations by two-tailed ratio paired t-test indicated as (\*). **b**, Live-cell imaging of NVCM cells in the schedule corresponding to the cytotoxicity/protection experiments (48 h after DAU addition). Changes in morphology are shown in visible light microscopy, red is fluorescence from MitoTracker Red CMXRos corresponding to active mitochondria, and blue signal is from staining nuclear DNA with Hoechst 33342. Scale bar = 100  $\mu$ m. **c**, Antiproliferative activity of topobexin (**9**) and its effects on antiproliferative activity of DAU were examined on HL-60 promyelocytic leukemia cell line. Cells were incubated for 72 h in the presence of 0.1–100  $\mu$ M topobexin (**9**), either alone or in combination with DAU in concentration corresponding to its previously determined IC<sub>50</sub> (15 nM),  $n = 4$ , mean  $\pm$  SD. Statistical significance ( $P \leq 0.05$ , one-way ANOVA) against untreated cells in column 1 indicated as (c) or against DAU treated cells in column 7 indicated as (d). **d**, The levels of phosphorylated  $\gamma$ H2AX in HL-60 promyelocytic leukemia cell line evaluated by Western blotting ( $n = 4$ ,  $P \leq 0.05$  against untreated control cells (c) or DAU (d) (one-way ANOVA)). For all box and whisker plots, center line represents the median, “+” represents the mean. Bounds of box indicate 25th to 75th percentile, whiskers indicate minimal and maximal value.

1 **Supplementary Table 1. Inhibitory concentrations and biochemical parameters of selected *obex* inhibitors.** LEC  
2 = lowest effective concentration, LTC = lowest toxic concentration, n.d. = not determined (not cardioprotective at any  
3 concentration used).

| compound      | NVCM (n=4) |       | TOP2 ATPase activity (n=3) |                  |             |                  |             |                    | Decatenation Activity of TOP2 Isoforms Expressed in Human Cells (HEK293F) (n=3) |             |                  |              |                  |        |
|---------------|------------|-------|----------------------------|------------------|-------------|------------------|-------------|--------------------|---------------------------------------------------------------------------------|-------------|------------------|--------------|------------------|--------|
|               | LEC        | LTC   | SR <sub>beta</sub>         | TOP2A            |             | TOP2B            |             | SR <sub>beta</sub> | TOP2A                                                                           |             | TOP2B            |              | IC <sub>50</sub> | 95% CI |
|               |            |       |                            | IC <sub>50</sub> | 95% CI      | IC <sub>50</sub> | 95% CI      |                    | IC <sub>50</sub>                                                                | 95% CI      | IC <sub>50</sub> | 95% CI       |                  |        |
| BNS-22        | 1          | > 10  | 1.5                        | 1.27             | (1.11–1.46) | 0.87             | (0.76–1.00) | 1.6                | 6.51                                                                            | (5.35–8.16) | 4.00             | (3.09–5.46)  |                  |        |
| dexrazoxane   |            |       | 0.89                       | 2.27             | (1.91–2.70) | 2.55             | (2.14–3.02) | 0.75               | 3.35                                                                            | (2.40–5.16) | 4.50             | (2.95–10.93) |                  |        |
| 1d            | 1          | 30    |                            |                  |             |                  |             |                    |                                                                                 |             |                  |              |                  |        |
| 2a            | n.d.       | > 100 |                            |                  |             |                  |             |                    |                                                                                 |             |                  |              |                  |        |
| 2b            | n.d.       | > 100 |                            |                  |             |                  |             |                    |                                                                                 |             |                  |              |                  |        |
| 2c            | 10         | 100   | 1.0                        | 0.69             | (0.62–0.77) | 0.66             | (0.60–0.74) |                    |                                                                                 |             |                  |              |                  |        |
| 2d            | 10         | 100   |                            |                  |             |                  |             |                    |                                                                                 |             |                  |              |                  |        |
| 3a            | n.d.       | > 10  |                            |                  |             |                  |             |                    |                                                                                 |             |                  |              |                  |        |
| 3b            | n.d.       | > 10  |                            |                  |             |                  |             |                    |                                                                                 |             |                  |              |                  |        |
| 3c            | 1          | > 10  | 1.6                        | 1.27             | (1.15–1.40) | 0.78             | (0.70–0.86) |                    |                                                                                 |             |                  |              |                  |        |
| 3d            | 1          | > 30  |                            |                  |             |                  |             |                    |                                                                                 |             |                  |              |                  |        |
| 4a            | 10         | > 30  |                            |                  |             |                  |             |                    |                                                                                 |             |                  |              |                  |        |
| 4b            | 0.1        | > 100 |                            |                  |             |                  |             |                    |                                                                                 |             |                  |              |                  |        |
| 4c            | 0.1        | 100   | 2.2                        | 1.87             | (1.25–2.72) | 0.85             | (0.66–1.13) |                    |                                                                                 |             |                  |              |                  |        |
| 4d            | 1          | 10    |                            |                  |             |                  |             |                    |                                                                                 |             |                  |              |                  |        |
| 5a            | 30         | > 100 |                            |                  |             |                  |             |                    |                                                                                 |             |                  |              |                  |        |
| 5b            | 10         | > 30  | 1.0                        | 1.42             | (0.90–2.50) | 1.46             | (0.88–2.79) |                    |                                                                                 |             |                  |              |                  |        |
| 5c            | 0.1        | 100   | 3.8                        | 1.54             | (1.45–1.64) | 0.41             | (0.39–0.43) | 2.2                | 3.21                                                                            | (2.52–4.19) | 1.43             | (1.23–1.67)  |                  |        |
| 5d            | n.d.       | 100   |                            |                  |             |                  |             |                    |                                                                                 |             |                  |              |                  |        |
| 6             | 10         | > 100 |                            |                  |             |                  |             |                    |                                                                                 |             |                  |              |                  |        |
| 7             | 10         | 100   |                            |                  |             |                  |             |                    |                                                                                 |             |                  |              |                  |        |
| 8             | 1          | 30    |                            |                  |             |                  |             |                    |                                                                                 |             |                  |              |                  |        |
| topobexin (9) | 1          | > 100 | 12                         | 4.09             | (2.89–6.29) | 0.35             | (0.27–0.46) | 25                 | 4.80                                                                            | (4.08–5.71) | 0.19             | (0.16–0.23)  |                  |        |

**Supplementary Table 2.** Macromolecular X-ray crystallography data collection and refinement statistics.

|                                                     |                                               |                                               |                                               |                                               |                                  |                                  |                                  |                                  |
|-----------------------------------------------------|-----------------------------------------------|-----------------------------------------------|-----------------------------------------------|-----------------------------------------------|----------------------------------|----------------------------------|----------------------------------|----------------------------------|
| ATPase Protein                                      | TOP2A                                         | TOP2A                                         | TOP2A                                         | TOP2A                                         | TOP2B                            | TOP2B                            | TOP2B                            | TOP2B                            |
| Compound                                            | -                                             | BNS-22                                        | <b>5c</b>                                     | Topobexin ( <b>9</b> )                        | -                                | BNS-22                           | <b>5c</b>                        | Topobexin ( <b>9</b> )           |
| PDB entry ID                                        | 9BQ6                                          | 9BQ7                                          | 9BQ9                                          | 9BQB                                          | 9BQ8                             | 9BQA                             | 9BQC                             | 9BQD                             |
| <b>Data collection</b>                              |                                               |                                               |                                               |                                               |                                  |                                  |                                  |                                  |
| Space group                                         | P2 <sub>1</sub> 2 <sub>1</sub> 2 <sub>1</sub> | P2 <sub>1</sub> 2 <sub>1</sub> 2 <sub>1</sub> | P2 <sub>1</sub> 2 <sub>1</sub> 2 <sub>1</sub> | P2 <sub>1</sub> 2 <sub>1</sub> 2 <sub>1</sub> | P4 <sub>1</sub> 2 <sub>1</sub> 2 | P4 <sub>1</sub> 2 <sub>1</sub> 2 | P4 <sub>1</sub> 2 <sub>1</sub> 2 | P4 <sub>1</sub> 2 <sub>1</sub> 2 |
| Cell dimensions                                     |                                               |                                               |                                               |                                               |                                  |                                  |                                  |                                  |
| <i>a</i> , <i>b</i> , <i>c</i> (Å)                  | 69.78, 92.70,<br>125.46                       | 69.93, 92.85,<br>126.95                       | 70.10, 92.62,<br>126.90                       | 69.80, 92.54,<br>125.58                       | 83.76, 83.76,<br>127.1           | 84.00, 84.00,<br>126.69          | 84.15, 84.15,<br>127.75          | 83.94, 83.94,<br>127.12          |
| $\alpha$ , $\beta$ , $\gamma$ (°)                   | 90, 90, 90                                    | 90, 90, 90                                    | 90, 90, 90                                    | 90, 90, 90                                    | 90, 90, 90                       | 90, 90, 90                       | 90, 90, 90                       | 90, 90, 90                       |
| Resolution (Å)                                      | 50-1.90<br>(1.97-1.90)                        | 50-2.05<br>(2.12-2.05)                        | 50-1.95<br>(2.02-1.95)                        | 50-1.50<br>(1.55-1.50)                        | 50-1.25<br>(1.29-1.25)           | 50.00-1.90<br>(1.97-1.90)        | 50-1.45<br>(1.50-1.45)           | 50-1.50<br>(1.55-1.50)           |
| <i>R</i> <sub>merge</sub>                           | 0.095 (1.40)                                  | 0.118 (2.04)                                  | 0.118 (1.74)                                  | 0.072 (1.54)                                  | 0.081 (2.13)                     | 0.118 (1.78)                     | 0.047 (1.23)                     | 0.078 (2.22)                     |
| <i>I</i> / $\sigma$ <i>I</i>                        | 18.7 (1.6)                                    | 19.4 (1.2)                                    | 16.4 (1.1)                                    | 32.5 (1.85)                                   | 34.8 (1.3)                       | 23.5 (1.7)                       | 36.6 (1.6)                       | 34.3 (1.25)                      |
| <i>CC</i> <sub>1/2</sub>                            | 0.99 (0.53)                                   | 1.00 (0.50)                                   | 1.00 (0.49)                                   | 1.00 (0.61)                                   | 1.00 (0.49)                      | 0.99 (0.60)                      | 1.00 (0.57)                      | 0.99 (0.43)                      |
| Completeness (%)                                    | 99.9 (99.6)                                   | 100 (100)                                     | 99.3 (99.7)                                   | 99.9 (100)                                    | 100 (99.9)                       | 99.9 (99.9)                      | 99.9 (99.9)                      | 100 (100)                        |
| Redundancy                                          | 6.8 (6.8)                                     | 6.8 (7.0)                                     | 6.8 (6.8)                                     | 13.2 (12.9)                                   | 13.2 (12.3)                      | 12.7 (12.4)                      | 7.4 (7.5)                        | 13.1 (13.1)                      |
| <b>Refinement</b>                                   |                                               |                                               |                                               |                                               |                                  |                                  |                                  |                                  |
| Resolution (Å)                                      | 50-1.90                                       | 47-2.05                                       | 47.05-1.95                                    | 46.68-1.50                                    | 43.33-1.25                       | 43.33-1.90                       | 43.5-1.45                        | 43.4-1.50                        |
| No. reflections                                     | 64689                                         | 52588                                         | 60669                                         | 130275                                        | 122574                           | 36224                            | 81098                            | 72408                            |
| <i>R</i> <sub>work</sub> / <i>R</i> <sub>free</sub> | 0.176/0.196                                   | 0.225/0.263                                   | 0.199/0.221                                   | 0.140/0.176                                   | 0.130/0.159                      | 0.167/0.194                      | 0.156/0.172                      | 0.131/0.162                      |
| Non-H atoms                                         |                                               |                                               |                                               |                                               |                                  |                                  |                                  |                                  |
| Protein                                             | 6208                                          | 6150                                          | 6194                                          | 6274                                          | 3223                             | 3132                             | 3150                             | 3169                             |
| Ligand/ion                                          | 64                                            | 132                                           | 132                                           | 144                                           | 32                               | 68                               | 62                               | 68                               |
| Water                                               | 400                                           | 293                                           | 355                                           | 641                                           | 519                              | 215                              | 398                              | 383                              |
| <i>B</i> -factors (Å <sup>2</sup> )                 |                                               |                                               |                                               |                                               |                                  |                                  |                                  |                                  |
| Protein                                             | 57.6                                          | 80.3                                          | 72.6                                          | 34.6                                          | 21.8                             | 40.3                             | 30.0                             | 28.9                             |
| Ligand/ion                                          | 34.0                                          | 51.4                                          | 46.7                                          | 23.1                                          | 12.5                             | 30.5                             | 20.2                             | 21.1                             |
| Water                                               | 47.7                                          | 53.4                                          | 53.3                                          | 42.0                                          | 36.4                             | 40.3                             | 40.4                             | 40.7                             |
| Ramachandran:                                       |                                               |                                               |                                               |                                               |                                  |                                  |                                  |                                  |
| Favoured (%)                                        | 97.0                                          | 97.1                                          | 97.9                                          | 97.6                                          | 98.2                             | 98.4                             | 98.4                             | 98.4                             |
| Allowed (%)                                         | 3.0                                           | 2.9                                           | 2.1                                           | 2.4                                           | 1.83                             | 1.57                             | 1.57                             | 1.56                             |
| Outliers (%)                                        | 0                                             | 0                                             | 0                                             | 0                                             | 0                                | 0                                | 0                                | 0                                |
| R.m.s. deviations                                   |                                               |                                               |                                               |                                               |                                  |                                  |                                  |                                  |
| Bond lengths (Å)                                    | 0.007                                         | 0.002                                         | 0.004                                         | 0.007                                         | 0.005                            | 0.005                            | 0.007                            | 0.008                            |
| Bond angles (°)                                     | 1.03                                          | 0.538                                         | 0.690                                         | 1.01                                          | 0.875                            | 0.838                            | 1.01                             | 1.13                             |

\*Each dataset was collected from a single crystal. Values in parentheses are for highest-resolution shell (10 % of reflections).

**Supplementary Table 3:** Small molecule X-ray crystallography data collection and refinement statistics

| Compound                           | BNS-22                                                                              | Topobexin (9)                                                                        |
|------------------------------------|-------------------------------------------------------------------------------------|--------------------------------------------------------------------------------------|
| CCDC #                             | 2354203                                                                             | 2354347                                                                              |
| Formula                            | C <sub>24</sub> H <sub>25</sub> NO <sub>5</sub>                                     | C <sub>29</sub> H <sub>37</sub> Cl <sub>2</sub> N <sub>3</sub> O <sub>4</sub>        |
| Formula Weight                     | 407.47                                                                              | 513.24                                                                               |
| Space Group                        | P-1                                                                                 | P2 <sub>1</sub> /n                                                                   |
| Flack Parameter                    | n/a                                                                                 | n/a                                                                                  |
| Cell Dimensions:                   |                                                                                     |                                                                                      |
| <i>a</i> /Å                        | 9.6814                                                                              | 17.560                                                                               |
| <i>b</i> /Å                        | 9.7569                                                                              | 7.3543                                                                               |
| <i>c</i> /Å                        | 11.232                                                                              | 21.712                                                                               |
| <i>a</i> °                         | 78.836                                                                              | 90                                                                                   |
| <i>b</i> °                         | 87.650                                                                              | 95.231                                                                               |
| <i>g</i> °                         | 72.619                                                                              | 90                                                                                   |
| Volume/Å <sup>3</sup>              | 993.25                                                                              | 2792.5                                                                               |
| <i>Z</i> (molecules per unit cell) | 2                                                                                   | 4                                                                                    |
| Wavelength/Å                       | 1.5418                                                                              | 1.5418                                                                               |
| Radiation type                     | Cu Kα                                                                               | Cu Kα                                                                                |
| Measured Refl's.                   | 31793                                                                               | 88959                                                                                |
| Indep't Refl's                     | 4010                                                                                | 5753                                                                                 |
| Resolution range/Å                 | 9.20-0.80                                                                           | 14.25-0.80                                                                           |
| <i>R</i> <sub>int</sub>            | 0.0213                                                                              | 0.0447                                                                               |
| Parameters                         | 274                                                                                 | 349                                                                                  |
| Restraints                         | 0                                                                                   | 0                                                                                    |
| Largest Peak/eÅ <sup>-3</sup>      | 0.27                                                                                | 0.52                                                                                 |
| Deepest Hole/eÅ <sup>-3</sup>      | -0.34                                                                               | -0.43                                                                                |
| <i>wR</i> <sub>2</sub> (all data)  | 0.1112                                                                              | 0.1100                                                                               |
| <i>wR</i> <sub>2</sub>             | 0.1110                                                                              | 0.1076                                                                               |
| <i>R</i> <sub>I</sub> (all data)   | 0.0417                                                                              | 0.0443                                                                               |
| <i>R</i> <sub>I</sub>              | 0.0414                                                                              | 0.0405                                                                               |
| Structure                          | 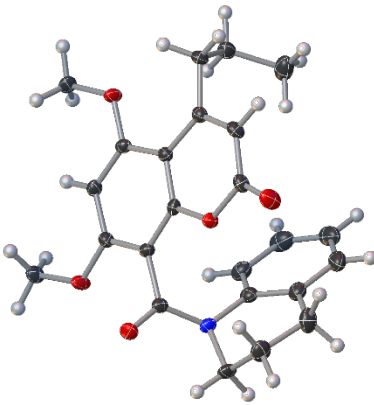 |  |

**Supplementary Table 4:** Summary of gene expression assays used for qPCR

| Gene symbol    | Protein name                                      | Producer | qPCR assay    | Sequence for design (Gene accession number) |
|----------------|---------------------------------------------------|----------|---------------|---------------------------------------------|
| <i>Coll1a1</i> | Collagen type I $\alpha$ 1                        | GB       | ocCOL1A1_Q1   | AY633663                                    |
| <i>Fnl</i>     | Fibronectin 1                                     | AB       | Oc06726463_m1 | XM_002712573.1                              |
| <i>Hprt1</i>   | Hypoxanthine guanine phosphoribosyl transferase 1 | GB       | ocHPRT1_Q3    | NM_001105671                                |
| <i>Nppb</i>    | Natriuretic peptide B (ANP)                       | GB       | ocNPPB_Q1     | XM_008275383.2                              |

# Individual gene expression assays were obtained from Geneti Biotech (GB) or Applied Biosystems (ABI).

**Supplementary Table 5:** P values and statistical tests from this study

Ctr = untreated control, ANOVA = One-way ANOVA with the Holm-Sidak post hoc test, Supp = Supplementary Figure, N = number of independent replicates. For results in Fig. 5 the numbers of animals in each experimental group were as follows: Ctr (n=9), topobexin (n=7), DAU (n=10), topobexin + DAU (n=11).

| Figure | Test  | N | Comparison                                                         | P value | Summary |
|--------|-------|---|--------------------------------------------------------------------|---------|---------|
| 1c     | ANOVA | 4 | Ctr vs. DAU [1.2 $\mu$ M]                                          | <0.0001 | ****    |
|        |       |   | Ctr vs. 5c [0.01 $\mu$ M] + DAU [1.2 $\mu$ M]                      | <0.0001 | ****    |
|        |       |   | Ctr vs. 5c [0.1 $\mu$ M] + DAU [1.2 $\mu$ M]                       | <0.0001 | ****    |
|        |       |   | Ctr vs. 5c [1 $\mu$ M] + DAU [1.2 $\mu$ M]                         | <0.0001 | ****    |
|        |       |   | Ctr vs. 5c [10 $\mu$ M] + DAU [1.2 $\mu$ M]                        | 0.0019  | **      |
|        |       |   | Ctr vs. 5c [30 $\mu$ M] + DAU [1.2 $\mu$ M]                        | 0.0012  | **      |
|        |       |   | Ctr vs. 5c [100 $\mu$ M] + DAU [1.2 $\mu$ M]                       | <0.0001 | ****    |
|        |       |   | DAU [1.2 $\mu$ M] vs. 5c [0.01 $\mu$ M] + DAU [1.2 $\mu$ M]        | 0.0825  | ns      |
|        |       |   | DAU [1.2 $\mu$ M] vs. 5c [0.1 $\mu$ M] + DAU [1.2 $\mu$ M]         | 0.0102  | *       |
|        |       |   | DAU [1.2 $\mu$ M] vs. 5c [1 $\mu$ M] + DAU [1.2 $\mu$ M]           | 0.0007  | ***     |
|        |       |   | DAU [1.2 $\mu$ M] vs. 5c [10 $\mu$ M] + DAU [1.2 $\mu$ M]          | <0.0001 | ****    |
|        |       |   | DAU [1.2 $\mu$ M] vs. 5c [30 $\mu$ M] + DAU [1.2 $\mu$ M]          | <0.0001 | ****    |
|        |       |   | DAU [1.2 $\mu$ M] vs. 5c [100 $\mu$ M] + DAU [1.2 $\mu$ M]         | 0.0004  | ***     |
| 4b     | ANOVA |   | TOP2A: Ctr vs. topobexin (9) [10 $\mu$ M]                          | 0.9806  | ns      |
|        |       |   | TOP2A: Ctr vs. etoposide [5 $\mu$ M]                               | <0.0001 | ****    |
|        |       |   | TOP2A: Ctr vs. topobexin (9) [0.1 $\mu$ M] + etoposide [5 $\mu$ M] | <0.0001 | ****    |

| Figure | Test                                                | N | Comparison                                                                           | P value | Summary |
|--------|-----------------------------------------------------|---|--------------------------------------------------------------------------------------|---------|---------|
|        |                                                     |   | TOP2A: Ctr vs. topobexin (9) [1 $\mu$ M] + etoposide [5 $\mu$ M]                     | 0.0001  | ***     |
|        |                                                     |   | TOP2A: Ctr vs. topobexin (9) [10 $\mu$ M] + etoposide [5 $\mu$ M]                    | 0.4735  | ns      |
|        |                                                     |   | TOP2A: etoposide [5 $\mu$ M] vs. topobexin (9) [0.1 $\mu$ M] + etoposide [5 $\mu$ M] | 0.9509  | ns      |
|        |                                                     |   | TOP2A: etoposide [5 $\mu$ M] vs. topobexin (9) [1 $\mu$ M] + etoposide [5 $\mu$ M]   | 0.3483  | ns      |
|        |                                                     |   | TOP2A: etoposide [5 $\mu$ M] vs. topobexin (9) [10 $\mu$ M] + etoposide [5 $\mu$ M]  | <0.0001 | ****    |
|        |                                                     |   | TOP2B: Ctr vs. topobexin (9) [10 $\mu$ M]                                            | 0.9883  | ns      |
|        |                                                     |   | TOP2B: Ctr vs. etoposide [5 $\mu$ M]                                                 | <0.0001 | ****    |
|        |                                                     |   | TOP2B: Ctr vs. topobexin (9) [0.1 $\mu$ M] + etoposide [5 $\mu$ M]                   | 0.0006  | ***     |
|        |                                                     |   | TOP2B: Ctr vs. topobexin (9) [1 $\mu$ M] + etoposide [5 $\mu$ M]                     | 0.3078  | ns      |
|        |                                                     |   | TOP2B: Ctr vs. topobexin (9) [10 $\mu$ M] + etoposide [5 $\mu$ M]                    | 0.9822  | ns      |
|        |                                                     |   | TOP2B: etoposide [5 $\mu$ M] vs. topobexin (9) [0.1 $\mu$ M] + etoposide [5 $\mu$ M] | 0.1431  | ns      |
|        |                                                     |   | TOP2B: etoposide [5 $\mu$ M] vs. topobexin (9) [1 $\mu$ M] + etoposide [5 $\mu$ M]   | 0.0004  | ***     |
|        |                                                     |   | TOP2B: etoposide [5 $\mu$ M] vs. topobexin (9) [10 $\mu$ M] + etoposide [5 $\mu$ M]  | <0.0001 | ****    |
|        | Unpaired t test with Welch's correction, two-tailed |   | etoposide [5 $\mu$ M]: TOP2A vs. TOP2B                                               | >0.9999 | ns      |
|        |                                                     |   | topobexin (9) [0.1 $\mu$ M] + etoposide [5 $\mu$ M]: TOP2A vs. TOP2B                 | 0.2668  | ns      |
|        |                                                     |   | topobexin (9) [1 $\mu$ M] + etoposide [5 $\mu$ M]: TOP2A vs. TOP2B                   | 0.0191  | *       |
|        |                                                     |   | topobexin (9) [10 $\mu$ M] + etoposide [5 $\mu$ M]: TOP2A vs. TOP2B                  | 0.0315  | *       |
| 4c     | ANOVA                                               | 4 | Ctr vs. topobexin (9) [100 $\mu$ M]                                                  | 0.9642  | ns      |
|        |                                                     |   | Ctr vs. DAU [1.2 $\mu$ M]                                                            | <0.0001 | ****    |
|        |                                                     |   | Ctr vs. topobexin (9) [0.01 $\mu$ M] + DAU [1.2 $\mu$ M]                             | <0.0001 | ****    |
|        |                                                     |   | Ctr vs. topobexin (9) [0.1 $\mu$ M] + DAU [1.2 $\mu$ M]                              | <0.0001 | ****    |
|        |                                                     |   | Ctr vs. topobexin (9) [1 $\mu$ M] + DAU [1.2 $\mu$ M]                                | <0.0001 | ****    |
|        |                                                     |   | Ctr vs. topobexin (9) [10 $\mu$ M] + DAU [1.2 $\mu$ M]                               | 0.0037  | **      |
|        |                                                     |   | Ctr vs. topobexin (9) [30 $\mu$ M] + DAU [1.2 $\mu$ M]                               | 0.0014  | **      |
|        |                                                     |   | Ctr vs. topobexin (9) [100 $\mu$ M] + DAU [1.2 $\mu$ M]                              | 0.0003  | ***     |
|        |                                                     |   | DAU [1.2 $\mu$ M] vs. topobexin (9) [0.01 $\mu$ M] + DAU [1.2 $\mu$ M]               | 0.6901  | ns      |



| Figure | Test                            | N    | Comparison                                                            | P value | Summary |
|--------|---------------------------------|------|-----------------------------------------------------------------------|---------|---------|
|        |                                 |      | DAU [1.2 $\mu$ M] vs. topobexin (9) [0.1 $\mu$ M] + DAU [1.2 $\mu$ M] | 0.5031  | ns      |
|        |                                 |      | DAU [1.2 $\mu$ M] vs. topobexin (9) [1 $\mu$ M] + DAU [1.2 $\mu$ M]   | 0.0062  | **      |
|        |                                 |      | DAU [1.2 $\mu$ M] vs. topobexin (9) [10 $\mu$ M] + DAU [1.2 $\mu$ M]  | 0.0002  | ***     |
|        |                                 |      | DAU [1.2 $\mu$ M] vs. topobexin (9) [30 $\mu$ M] + DAU [1.2 $\mu$ M]  | 0.0003  | ***     |
|        |                                 |      | DAU [1.2 $\mu$ M] vs. topobexin (9) [100 $\mu$ M] + DAU [1.2 $\mu$ M] | 0.0009  | ***     |
| 4d     | ANOVA                           | 3    | Ctr vs. topobexin (9) [0.1 $\mu$ M]                                   | 0.0002  | ***     |
|        |                                 |      | Ctr vs. topobexin (9) [1 $\mu$ M]                                     | 0.0001  | ***     |
|        |                                 |      | Ctr vs. topobexin (9) [10 $\mu$ M]                                    | 0.0001  | ***     |
| 4e     | ANOVA                           | 3    | Ctr vs. topobexin (9) [0.1 $\mu$ M]                                   | 0.9998  | ns      |
|        |                                 |      | Ctr vs. topobexin (9) [1 $\mu$ M]                                     | 0.9998  | ns      |
|        |                                 |      | Ctr vs. topobexin (9) [10 $\mu$ M]                                    | 0.9998  | ns      |
|        |                                 |      | Ctr vs. DAU [1.2 $\mu$ M]                                             | <0.0001 | ****    |
|        |                                 |      | Ctr vs. topobexin (9) [0.1 $\mu$ M] + DAU [1.2 $\mu$ M]               | <0.0001 | ****    |
|        |                                 |      | Ctr vs. topobexin (9) [1 $\mu$ M] + DAU [1.2 $\mu$ M]                 | 0.9482  | ns      |
|        |                                 |      | Ctr vs. topobexin (9) [10 $\mu$ M] + DAU [1.2 $\mu$ M]                | 0.9998  | ns      |
|        |                                 |      | DAU [1.2 $\mu$ M] vs. topobexin (9) [0.1 $\mu$ M] + DAU [1.2 $\mu$ M] | <0.0001 | ****    |
|        |                                 |      | DAU [1.2 $\mu$ M] vs. topobexin (9) [1 $\mu$ M] + DAU [1.2 $\mu$ M]   | <0.0001 | ****    |
|        |                                 |      | DAU [1.2 $\mu$ M] vs. topobexin (9) [10 $\mu$ M] + DAU [1.2 $\mu$ M]  | <0.0001 | ****    |
| 4f     | Ratio paired t-test, two-tailed | 6    | Csp3/7: Cmpd 9 + DAU vs. DAU                                          | <0.0001 | ****    |
|        |                                 |      | Csp8: Cmpd 9 + DAU vs. DAU                                            | 0.0387  | *       |
|        |                                 |      | Csp9: Cmpd 9 + DAU vs. DAU                                            | 0.0001  | ***     |
| 5b     | ANOVA                           | 6    | topobexin+DAU vs. DAU                                                 | <0.001  | ***     |
|        |                                 |      | CTR vs. DAU                                                           | <0.001  | ***     |
|        |                                 |      | topobexin vs. DAU                                                     | <0.001  | ***     |
|        |                                 |      | topobexin+DAU vs. CTR                                                 | 0.947   | No      |
|        |                                 |      | topobexin+DAU vs. topobexin                                           | 0.902   | No      |
|        |                                 |      | topobexin vs. CTR                                                     | 0.932   | No      |
| 5d     | ANOVA                           | 7–11 | topobexin vs. DAU                                                     | <0.001  | ***     |
|        |                                 |      | topobexin vs. topobexin+DAU                                           | 0.004   | **      |
|        |                                 |      | CTR vs. DAU                                                           | 0.024   | *       |

| Figure | Test                                         | N    | Comparison                  | P value | Summary |
|--------|----------------------------------------------|------|-----------------------------|---------|---------|
|        |                                              |      | topobexin vs. CTR           | 0.164   | ns      |
|        |                                              |      | CTR vs. topobexin+DAU       | 0.267   | ns      |
|        |                                              |      | topobexin+DAU vs. DAU       | 0.221   | ns      |
| 5e     | ANOVA                                        | 7–11 | topobexin+DAU vs. DAU       | <0.001  | ***     |
|        |                                              |      | CTR vs. DAU                 | <0.001  | ***     |
|        |                                              |      | topobexin vs. DAU           | <0.001  | ***     |
|        |                                              |      | topobexin+DAU vs. CTR       | 0.953   | ns      |
|        |                                              |      | topobexin vs. CTR           | 0.906   | ns      |
|        |                                              |      | topobexin+DAU vs. topobexin | 0.979   | ns      |
| 5f     | ANOVA                                        | 7–11 | topobexin+DAU vs. DAU       | <0.001  | ***     |
|        |                                              |      | CTR vs. DAU                 | <0.001  | ***     |
|        |                                              |      | topobexin vs. DAU           | <0.001  | ***     |
|        |                                              |      | topobexin+DAU vs. topobexin | 0.982   | ns      |
|        |                                              |      | topobexin+DAU vs. CTR       | 0.952   | ns      |
|        |                                              |      | CTR vs. topobexin           | 0.943   | ns      |
| 5g     | ANOVA                                        | 7–11 | topobexin+DAU vs. DAU       | <0.001  | ***     |
|        |                                              |      | CTR vs. DAU                 | <0.001  | ***     |
|        |                                              |      | topobexin vs. DAU           | <0.001  | ***     |
|        |                                              |      | CTR vs. topobexin+DAU       | 0.453   | ns      |
|        |                                              |      | topobexin vs. topobexin+DAU | 0.669   | ns      |
|        |                                              |      | CTR vs. topobexin           | 0.672   | ns      |
| 5h     | Kruskal-Wallis with the Dunn's post hoc test | 7–11 | topobexin vs DAU            | 0.003   | **      |
|        |                                              |      | CTR vs DAU                  | 0.002   | **      |
|        |                                              |      | topobexin+DAU vs DAU        | 0.017   | *       |
|        |                                              |      | topobexin+DAU vs topobexin  | 1       | ns      |
|        |                                              |      | topobexin+DAU vs CTR        | 1       | ns      |
|        |                                              |      | CTR vs topobexin            | 1       | ns      |
| 5i     | ANOVA                                        | 7–11 | CTR vs. DAU                 | <0.001  | ***     |

| Figure    | Test  | N    | Comparison                                       | P value | Summary |
|-----------|-------|------|--------------------------------------------------|---------|---------|
|           |       |      | topobexin vs. DAU                                | 0.002   | **      |
|           |       |      | topobexin+DAU vs. DAU                            | 0.025   | *       |
|           |       |      | topobexin+DAU vs. CTR                            | 0.122   | ns      |
|           |       |      | topobexin+DAU vs. topobexin                      | 0.229   | ns      |
|           |       |      | topobexin vs. CTR                                | 0.638   | ns      |
| 5j        | ANOVA | 7–11 | topobexin vs DAU                                 | <0.001  | ***     |
|           |       |      | CTR vs DAU                                       | <0.001  | ***     |
|           |       |      | topobexin+DAU vs DAU                             | <0.001  | ***     |
|           |       |      | topobexin+DAU vs. CTR                            | 0.992   | ns      |
|           |       |      | topobexin vs. CTR                                | 0.988   | ns      |
|           |       |      | topobexin+DAU vs. topobexin                      | 0.928   | ns      |
| 5k        | ANOVA | 7–11 | topobexin vs DAU                                 | <0.001  | ***     |
|           |       |      | CTR vs DAU                                       | <0.001  | ***     |
|           |       |      | topobexin+DAU vs DAU                             | <0.001  | ***     |
|           |       |      | topobexin+DAU vs. CTR                            | 0.859   | ns      |
|           |       |      | topobexin+DAU vs. topobexin                      | 0.886   | ns      |
|           |       |      | topobexin vs. CTR                                | 0.831   | ns      |
| <b>SI</b> |       |      |                                                  |         |         |
| Supp 2f   | ANOVA | 4    | Ctr vs. DAU [1.2 µM]                             | <0.0001 | ****    |
|           |       |      | Ctr vs. BNS-22 [0.01 µM] + DAU [1.2 µM]          | <0.0001 | ****    |
|           |       |      | Ctr vs. BNS-22 [0.1 µM] + DAU [1.2 µM]           | <0.0001 | ****    |
|           |       |      | Ctr vs. BNS-22 [1 µM] + DAU [1.2 µM]             | <0.0001 | ****    |
|           |       |      | Ctr vs. BNS-22 [3 µM] + DAU [1.2 µM]             | 0.0005  | ***     |
|           |       |      | Ctr vs. BNS-22 [10 µM] + DAU [1.2 µM]            | 0.0015  | **      |
|           |       |      | DAU [1.2 µM] vs. BNS-22 [0.01 µM] + DAU [1.2 µM] | 0.8002  | ns      |
|           |       |      | DAU [1.2 µM] vs. BNS-22 [0.1 µM] + DAU [1.2 µM]  | 0.0755  | ns      |
|           |       |      | DAU [1.2 µM] vs. BNS-22 [1 µM] + DAU [1.2 µM]    | 0.0012  | **      |
|           |       |      | DAU [1.2 µM] vs. BNS-22 [3 µM] + DAU [1.2 µM]    | <0.0001 | ****    |
|           |       |      | DAU [1.2 µM] vs. BNS-22 [10 µM] + DAU [1.2 µM]   | <0.0001 | ****    |

| Figure | Test  | N | Comparison                                          | P value | Summary |
|--------|-------|---|-----------------------------------------------------|---------|---------|
| Supp 3 | ANOVA | 4 | 1: Ctr vs. DAU [1.2 µM]                             | <0.0001 | ****    |
|        |       |   | 1: Ctr vs. BNS-22 [0.01 µM] + DAU [1.2 µM]          | <0.0001 | ****    |
|        |       |   | 1: Ctr vs. BNS-22 [0.1 µM] + DAU [1.2 µM]           | <0.0001 | ****    |
|        |       |   | 1: Ctr vs. BNS-22 [1 µM] + DAU [1.2 µM]             | <0.0001 | ****    |
|        |       |   | 1: Ctr vs. BNS-22 [3 µM] + DAU [1.2 µM]             | 0.0003  | ***     |
|        |       |   | 1: Ctr vs. BNS-22 [10 µM] + DAU [1.2 µM]            | 0.0009  | ***     |
|        | ANOVA | 4 | 1: DAU [1.2 µM] vs. BNS-22 [0.01 µM] + DAU [1.2 µM] | 0.8002  | ns      |
|        |       |   | 1: DAU [1.2 µM] vs. BNS-22 [0.1 µM] + DAU [1.2 µM]  | 0.0755  | ns      |
|        |       |   | 1: DAU [1.2 µM] vs. BNS-22 [1 µM] + DAU [1.2 µM]    | 0.0012  | **      |
|        |       |   | 1: DAU [1.2 µM] vs. BNS-22 [3 µM] + DAU [1.2 µM]    | <0.0001 | ****    |
|        |       |   | 1: DAU [1.2 µM] vs. BNS-22 [10 µM] + DAU [1.2 µM]   | <0.0001 | ****    |
|        | ANOVA | 4 | 1d: Ctr vs. DAU [1.2 µM]                            | <0.0001 | ****    |
|        |       |   | 1d: Ctr vs. 1d [0.1 µM] + DAU [1.2 µM]              | <0.0001 | ****    |
|        |       |   | 1d: Ctr vs. 1d [1 µM] + DAU [1.2 µM]                | 0.0007  | ***     |
|        |       |   | 1d: Ctr vs. 1d [10 µM] + DAU [1.2 µM]               | <0.0001 | ****    |
|        |       |   | 1d: Ctr vs. 1d [30 µM] + DAU [1.2 µM]               | <0.0001 | ****    |
|        |       |   | 1d: Ctr vs. 1d [100 µM] + DAU [1.2 µM]              | <0.0001 | ****    |
|        | ANOVA | 4 | 1d: DAU [1.2 µM] vs. 1d [0.1 µM] + DAU [1.2 µM]     | 0.0638  | ns      |
|        |       |   | 1d: DAU [1.2 µM] vs. 1d [1 µM] + DAU [1.2 µM]       | 0.0002  | ***     |
|        |       |   | 1d: DAU [1.2 µM] vs. 1d [10 µM] + DAU [1.2 µM]      | 0.0009  | ***     |
|        |       |   | 1d: DAU [1.2 µM] vs. 1d [30 µM] + DAU [1.2 µM]      | 0.0003  | ***     |
|        |       |   | 1d: DAU [1.2 µM] vs. 1d [100 µM] + DAU [1.2 µM]     | <0.0001 | ****    |
|        | ANOVA | 4 | 2a: Ctr vs. DAU [1.2 µM]                            | <0.0001 | ****    |
|        |       |   | 2a: Ctr vs. 2a [10 µM] + DAU [1.2 µM]               | <0.0001 | ****    |
|        |       |   | 2a: Ctr vs. 2a [30 µM] + DAU [1.2 µM]               | <0.0001 | ****    |
|        |       |   | 2a: Ctr vs. 2a [100 µM] + DAU [1.2 µM]              | <0.0001 | ****    |
|        | ANOVA | 4 | 2a: DAU [1.2 µM] vs. 2a [10 µM] + DAU [1.2 µM]      | 0.9188  | ns      |
|        |       |   | 2a: DAU [1.2 µM] vs. 2a [30 µM] + DAU [1.2 µM]      | 0.9188  | ns      |
|        |       |   | 2a: DAU [1.2 µM] vs. 2a [100 µM] + DAU [1.2 µM]     | 0.9188  | ns      |
|        | ANOVA | 4 | 2b: Ctr vs. DAU [1.2 µM]                            | <0.0001 | ****    |
|        |       |   | 2b: Ctr vs. 2b [10 µM] + DAU [1.2 µM]               | <0.0001 | ****    |

| Figure | Test  | N   | Comparison                                      | P value | Summary |
|--------|-------|-----|-------------------------------------------------|---------|---------|
|        |       |     | 2b: Ctr vs. 2b [30 µM] + DAU [1.2 µM]           | <0.0001 | ****    |
|        |       |     | 2b: Ctr vs. 2b [100 µM] + DAU [1.2 µM]          | <0.0001 | ****    |
|        | ANOVA | 4   | 2b: DAU [1.2 µM] vs. 2b [10 µM] + DAU [1.2 µM]  | 0.1288  | ns      |
|        |       |     | 2b: DAU [1.2 µM] vs. 2b [30 µM] + DAU [1.2 µM]  | 0.1919  | ns      |
|        |       |     | 2b: DAU [1.2 µM] vs. 2b [100 µM] + DAU [1.2 µM] | 0.1288  | ns      |
|        | ANOVA | 4   | 2c: Ctr vs. DAU [1.2 µM]                        | <0.0001 | ****    |
|        |       |     | 2c: Ctr vs. 2c [1 µM] + DAU [1.2 µM]            | <0.0001 | ****    |
|        |       |     | 2c: Ctr vs. 2c [10 µM] + DAU [1.2 µM]           | <0.0001 | ****    |
|        |       |     | 2c: Ctr vs. 2c [30 µM] + DAU [1.2 µM]           | 0.0035  | **      |
|        |       |     | 2c: Ctr vs. 2c [100 µM] + DAU [1.2 µM]          | <0.0001 | ****    |
|        | ANOVA | 4   | 2c: DAU [1.2 µM] vs. 2c [1 µM] + DAU [1.2 µM]   | 0.1694  | ns      |
|        |       |     | 2c: DAU [1.2 µM] vs. 2c [10 µM] + DAU [1.2 µM]  | 0.0171  | *       |
|        |       |     | 2c: DAU [1.2 µM] vs. 2c [30 µM] + DAU [1.2 µM]  | 0.0021  | **      |
|        |       |     | 2c: DAU [1.2 µM] vs. 2c [100 µM] + DAU [1.2 µM] | 0.2739  | ns      |
|        | ANOVA | 4   | 2d: Ctr vs. DAU [1.2 µM]                        | <0.0001 | ****    |
|        |       |     | 2d: Ctr vs. 2d [0.1 µM] + DAU [1.2 µM]          | <0.0001 | ****    |
|        |       |     | 2d: Ctr vs. 2d [1 µM] + DAU [1.2 µM]            | <0.0001 | ****    |
|        |       |     | 2d: Ctr vs. 2d [10 µM] + DAU [1.2 µM]           | 0.0031  | **      |
|        |       |     | 2d: Ctr vs. 2d [30 µM] + DAU [1.2 µM]           | 0.0128  | *       |
|        |       |     | 2d: Ctr vs. 2d [100 µM] + DAU [1.2 µM]          | <0.0001 | ****    |
|        | ANOVA | 4–5 | 2d: DAU [1.2 µM] vs. 2d [0.1 µM] + DAU [1.2 µM] | 0.5859  | ns      |
|        |       |     | 2d: DAU [1.2 µM] vs. 2d [1 µM] + DAU [1.2 µM]   | 0.3259  | ns      |
|        |       |     | 2d: DAU [1.2 µM] vs. 2d [10 µM] + DAU [1.2 µM]  | 0.0272  | *       |
|        |       |     | 2d: DAU [1.2 µM] vs. 2d [30 µM] + DAU [1.2 µM]  | 0.0117  | *       |
|        |       |     | 2d: DAU [1.2 µM] vs. 2d [100 µM] + DAU [1.2 µM] | <0.0001 | ****    |
|        | ANOVA | 4   | 3a: Ctr vs. DAU [1.2 µM]                        | <0.0001 | ****    |
|        |       |     | 3a: Ctr vs. 3a [1 µM] + DAU [1.2 µM]            | <0.0001 | ****    |
|        |       |     | 3a: Ctr vs. 3a [3 µM] + DAU [1.2 µM]            | <0.0001 | ****    |
|        |       |     | 3a: Ctr vs. 3a [10 µM] + DAU [1.2 µM]           | <0.0001 | ****    |
|        | ANOVA | 4–5 | 3a: DAU [1.2 µM] vs. 3a [1 µM] + DAU [1.2 µM]   | 0.7736  | ns      |
|        |       |     | 3a: DAU [1.2 µM] vs. 3a [3 µM] + DAU [1.2 µM]   | 0.7736  | ns      |

| Figure | Test  | N | Comparison                                                      | P value | Summary |
|--------|-------|---|-----------------------------------------------------------------|---------|---------|
|        |       |   | 3a: DAU [1.2 $\mu$ M] vs. 3a [10 $\mu$ M] + DAU [1.2 $\mu$ M]   | 0.7736  | ns      |
|        | ANOVA | 4 | 3b: Ctr vs. DAU [1.2 $\mu$ M]                                   | <0.0001 | ****    |
|        |       |   | 3b: Ctr vs. 3b [1 $\mu$ M] + DAU [1.2 $\mu$ M]                  | <0.0001 | ****    |
|        |       |   | 3b: Ctr vs. 3b [3 $\mu$ M] + DAU [1.2 $\mu$ M]                  | <0.0001 | ****    |
|        |       |   | 3b: Ctr vs. 3b [10 $\mu$ M] + DAU [1.2 $\mu$ M]                 | <0.0001 | ****    |
|        | ANOVA | 4 | 3b: DAU [1.2 $\mu$ M] vs. 3b [1 $\mu$ M] + DAU [1.2 $\mu$ M]    | 0.3074  | ns      |
|        |       |   | 3b: DAU [1.2 $\mu$ M] vs. 3b [3 $\mu$ M] + DAU [1.2 $\mu$ M]    | 0.3634  | ns      |
|        |       |   | 3b: DAU [1.2 $\mu$ M] vs. 3b [10 $\mu$ M] + DAU [1.2 $\mu$ M]   | 0.2150  | ns      |
|        | ANOVA | 4 | 3c: Ctr vs. DAU [1.2 $\mu$ M]                                   | <0.0001 | ****    |
|        |       |   | 3c: Ctr vs. 3c [0.1 $\mu$ M] + DAU [1.2 $\mu$ M]                | <0.0001 | ****    |
|        |       |   | 3c: Ctr vs. 3c [1 $\mu$ M] + DAU [1.2 $\mu$ M]                  | <0.0001 | ****    |
|        |       |   | 3c: Ctr vs. 3c [3 $\mu$ M] + DAU [1.2 $\mu$ M]                  | <0.0001 | ****    |
|        |       |   | 3c: Ctr vs. 3c [10 $\mu$ M] + DAU [1.2 $\mu$ M]                 | 0.0012  | **      |
|        | ANOVA | 4 | 3c: DAU [1.2 $\mu$ M] vs. 3c [0.1 $\mu$ M] + DAU [1.2 $\mu$ M]  | 0.1762  | ns      |
|        |       |   | 3c: DAU [1.2 $\mu$ M] vs. 3c [1 $\mu$ M] + DAU [1.2 $\mu$ M]    | 0.0093  | **      |
|        |       |   | 3c: DAU [1.2 $\mu$ M] vs. 3c [3 $\mu$ M] + DAU [1.2 $\mu$ M]    | 0.0014  | **      |
|        |       |   | 3c: DAU [1.2 $\mu$ M] vs. 3c [10 $\mu$ M] + DAU [1.2 $\mu$ M]   | 0.0001  | ***     |
|        | ANOVA | 4 | 3d: Ctr vs. DAU [1.2 $\mu$ M]                                   | <0.0001 | ****    |
|        |       |   | 3d: Ctr vs. 3d [0.01 $\mu$ M] + DAU [1.2 $\mu$ M]               | <0.0001 | ****    |
|        |       |   | 3d: Ctr vs. 3d [0.1 $\mu$ M] + DAU [1.2 $\mu$ M]                | <0.0001 | ****    |
|        |       |   | 3d: Ctr vs. 3d [1 $\mu$ M] + DAU [1.2 $\mu$ M]                  | <0.0001 | ****    |
|        |       |   | 3d: Ctr vs. 3d [10 $\mu$ M] + DAU [1.2 $\mu$ M]                 | 0.0496  | *       |
|        |       |   | 3d: Ctr vs. 3d [30 $\mu$ M] + DAU [1.2 $\mu$ M]                 | 0.0010  | **      |
|        | ANOVA | 4 | 3d: DAU [1.2 $\mu$ M] vs. 3d [0.01 $\mu$ M] + DAU [1.2 $\mu$ M] | 0.9523  | ns      |
|        |       |   | 3d: DAU [1.2 $\mu$ M] vs. 3d [0.1 $\mu$ M] + DAU [1.2 $\mu$ M]  | 0.0926  | ns      |
|        |       |   | 3d: DAU [1.2 $\mu$ M] vs. 3d [1 $\mu$ M] + DAU [1.2 $\mu$ M]    | 0.0208  | *       |
|        |       |   | 3d: DAU [1.2 $\mu$ M] vs. 3d [10 $\mu$ M] + DAU [1.2 $\mu$ M]   | 0.0002  | ***     |
|        |       |   | 3d: DAU [1.2 $\mu$ M] vs. 3d [30 $\mu$ M] + DAU [1.2 $\mu$ M]   | 0.0023  | **      |
|        | ANOVA | 4 | 4a: Ctr vs. DAU [1.2 $\mu$ M]                                   | <0.0001 | ****    |
|        |       |   | 4a: Ctr vs. 4a [0.1 $\mu$ M] + DAU [1.2 $\mu$ M]                | <0.0001 | ****    |
|        |       |   | 4a: Ctr vs. 4a [1 $\mu$ M] + DAU [1.2 $\mu$ M]                  | <0.0001 | ****    |



| Figure | Test  | N   | Comparison                                                      | P value | Summary |
|--------|-------|-----|-----------------------------------------------------------------|---------|---------|
|        |       |     | 4a: Ctr vs. 4a [10 $\mu$ M] + DAU [1.2 $\mu$ M]                 | <0.0001 | ****    |
|        |       |     | 4a: Ctr vs. 4a [30 $\mu$ M] + DAU [1.2 $\mu$ M]                 | <0.0001 | ****    |
|        | ANOVA | 4–5 | 4a: DAU [1.2 $\mu$ M] vs. 4a [0.1 $\mu$ M] + DAU [1.2 $\mu$ M]  | 0.4863  | ns      |
|        |       |     | 4a: DAU [1.2 $\mu$ M] vs. 4a [1 $\mu$ M] + DAU [1.2 $\mu$ M]    | 0.1212  | ns      |
|        |       |     | 4a: DAU [1.2 $\mu$ M] vs. 4a [10 $\mu$ M] + DAU [1.2 $\mu$ M]   | 0.0003  | ***     |
|        |       |     | 4a: DAU [1.2 $\mu$ M] vs. 4a [30 $\mu$ M] + DAU [1.2 $\mu$ M]   | <0.0001 | ****    |
|        | ANOVA | 4   | 4b: Ctr vs. DAU [1.2 $\mu$ M]                                   | <0.0001 | ****    |
|        |       |     | 4b: Ctr vs. 4b [0.01 $\mu$ M] + DAU [1.2 $\mu$ M]               | <0.0001 | ****    |
|        |       |     | 4b: Ctr vs. 4b [0.1 $\mu$ M] + DAU [1.2 $\mu$ M]                | <0.0001 | ****    |
|        |       |     | 4b: Ctr vs. 4b [1 $\mu$ M] + DAU [1.2 $\mu$ M]                  | <0.0001 | ****    |
|        |       |     | 4b: Ctr vs. 4b [10 $\mu$ M] + DAU [1.2 $\mu$ M]                 | <0.0001 | ****    |
|        |       |     | 4b: Ctr vs. 4b [30 $\mu$ M] + DAU [1.2 $\mu$ M]                 | 0.0001  | ***     |
|        |       |     | 4b: Ctr vs. 4b [100 $\mu$ M] + DAU [1.2 $\mu$ M]                | <0.0001 | ****    |
|        | ANOVA | 4   | 4b: DAU [1.2 $\mu$ M] vs. 4b [0.01 $\mu$ M] + DAU [1.2 $\mu$ M] | 0.1177  | ns      |
|        |       |     | 4b: DAU [1.2 $\mu$ M] vs. 4b [0.1 $\mu$ M] + DAU [1.2 $\mu$ M]  | 0.0124  | *       |
|        |       |     | 4b: DAU [1.2 $\mu$ M] vs. 4b [1 $\mu$ M] + DAU [1.2 $\mu$ M]    | <0.0001 | ****    |
|        |       |     | 4b: DAU [1.2 $\mu$ M] vs. 4b [10 $\mu$ M] + DAU [1.2 $\mu$ M]   | <0.0001 | ****    |
|        |       |     | 4b: DAU [1.2 $\mu$ M] vs. 4b [30 $\mu$ M] + DAU [1.2 $\mu$ M]   | <0.0001 | ****    |
|        |       |     | 4b: DAU [1.2 $\mu$ M] vs. 4b [100 $\mu$ M] + DAU [1.2 $\mu$ M]  | <0.0001 | ****    |
|        | ANOVA | 4   | 4c: Ctr vs. DAU [1.2 $\mu$ M]                                   | <0.0001 | ****    |
|        |       |     | 4c: Ctr vs. 4c [0.01 $\mu$ M] + DAU [1.2 $\mu$ M]               | 0.0002  | ***     |
|        |       |     | 4c: Ctr vs. 4c [0.1 $\mu$ M] + DAU [1.2 $\mu$ M]                | 0.0106  | *       |
|        |       |     | 4c: Ctr vs. 4c [1 $\mu$ M] + DAU [1.2 $\mu$ M]                  | 0.2503  | ns      |
|        |       |     | 4c: Ctr vs. 4c [10 $\mu$ M] + DAU [1.2 $\mu$ M]                 | 0.0313  | *       |
|        |       |     | 4c: Ctr vs. 4c [30 $\mu$ M] + DAU [1.2 $\mu$ M]                 | <0.0001 | ****    |
|        |       |     | 4c: Ctr vs. 4c [100 $\mu$ M] + DAU [1.2 $\mu$ M]                | <0.0001 | ****    |
|        | ANOVA | 4   | 4c: DAU [1.2 $\mu$ M] vs. 4c [0.01 $\mu$ M] + DAU [1.2 $\mu$ M] | 0.4467  | ns      |
|        |       |     | 4c: DAU [1.2 $\mu$ M] vs. 4c [0.1 $\mu$ M] + DAU [1.2 $\mu$ M]  | 0.0392  | *       |
|        |       |     | 4c: DAU [1.2 $\mu$ M] vs. 4c [1 $\mu$ M] + DAU [1.2 $\mu$ M]    | 0.0011  | **      |
|        |       |     | 4c: DAU [1.2 $\mu$ M] vs. 4c [10 $\mu$ M] + DAU [1.2 $\mu$ M]   | 0.0162  | *       |
|        |       |     | 4c: DAU [1.2 $\mu$ M] vs. 4c [30 $\mu$ M] + DAU [1.2 $\mu$ M]   | 0.4467  | ns      |

| Figure | Test  | N   | Comparison                                                      | P value | Summary |
|--------|-------|-----|-----------------------------------------------------------------|---------|---------|
|        |       |     | 4c: DAU [1.2 $\mu$ M] vs. 4c [100 $\mu$ M] + DAU [1.2 $\mu$ M]  | 0.0004  | ***     |
|        | ANOVA | 4   | 4d: Ctr vs. DAU [1.2 $\mu$ M]                                   | <0.0001 | ****    |
|        |       |     | 4d: Ctr vs. 4d [0.01 $\mu$ M] + DAU [1.2 $\mu$ M]               | 0.0003  | ***     |
|        |       |     | 4d: Ctr vs. 4d [0.1 $\mu$ M] + DAU [1.2 $\mu$ M]                | 0.0063  | **      |
|        |       |     | 4d: Ctr vs. 4d [1 $\mu$ M] + DAU [1.2 $\mu$ M]                  | 0.1423  | ns      |
|        |       |     | 4d: Ctr vs. 4d [10 $\mu$ M] + DAU [1.2 $\mu$ M]                 | <0.0001 | ****    |
|        |       |     | 4d: Ctr vs. 4d [30 $\mu$ M] + DAU [1.2 $\mu$ M]                 | <0.0001 | ****    |
|        |       |     | 4d: Ctr vs. 4d [100 $\mu$ M] + DAU [1.2 $\mu$ M]                | <0.0001 | ****    |
|        | ANOVA | 4   | 4d: DAU [1.2 $\mu$ M] vs. 4d [0.01 $\mu$ M] + DAU [1.2 $\mu$ M] | 0.4723  | ns      |
|        |       |     | 4d: DAU [1.2 $\mu$ M] vs. 4d [0.1 $\mu$ M] + DAU [1.2 $\mu$ M]  | 0.1168  | ns      |
|        |       |     | 4d: DAU [1.2 $\mu$ M] vs. 4d [1 $\mu$ M] + DAU [1.2 $\mu$ M]    | 0.0106  | *       |
|        |       |     | 4d: DAU [1.2 $\mu$ M] vs. 4d [10 $\mu$ M] + DAU [1.2 $\mu$ M]   | 0.7305  | ns      |
|        |       |     | 4d: DAU [1.2 $\mu$ M] vs. 4d [30 $\mu$ M] + DAU [1.2 $\mu$ M]   | <0.0001 | ****    |
|        |       |     | 4d: DAU [1.2 $\mu$ M] vs. 4d [100 $\mu$ M] + DAU [1.2 $\mu$ M]  | <0.0001 | ****    |
|        | ANOVA | 4   | 5a: Ctr vs. DAU [1.2 $\mu$ M]                                   | <0.0001 | ****    |
|        |       |     | 5a: Ctr vs. 5a [1 $\mu$ M] + DAU [1.2 $\mu$ M]                  | <0.0001 | ****    |
|        |       |     | 5a: Ctr vs. 5a [10 $\mu$ M] + DAU [1.2 $\mu$ M]                 | <0.0001 | ****    |
|        |       |     | 5a: Ctr vs. 5a [30 $\mu$ M] + DAU [1.2 $\mu$ M]                 | <0.0001 | ****    |
|        |       |     | 5a: Ctr vs. 5a [100 $\mu$ M] + DAU [1.2 $\mu$ M]                | <0.0001 | ****    |
|        | ANOVA | 4–5 | 5a: DAU [1.2 $\mu$ M] vs. 5a [1 $\mu$ M] + DAU [1.2 $\mu$ M]    | 0.3090  | ns      |
|        |       |     | 5a: DAU [1.2 $\mu$ M] vs. 5a [10 $\mu$ M] + DAU [1.2 $\mu$ M]   | 0.3090  | ns      |
|        |       |     | 5a: DAU [1.2 $\mu$ M] vs. 5a [30 $\mu$ M] + DAU [1.2 $\mu$ M]   | 0.0065  | **      |
|        |       |     | 5a: DAU [1.2 $\mu$ M] vs. 5a [100 $\mu$ M] + DAU [1.2 $\mu$ M]  | 0.0009  | ***     |
|        | ANOVA | 4   | 5b: Ctr vs. DAU [1.2 $\mu$ M]                                   | <0.0001 | ****    |
|        |       |     | 5b: Ctr vs. 5b [0.1 $\mu$ M] + DAU [1.2 $\mu$ M]                | <0.0001 | ****    |
|        |       |     | 5b: Ctr vs. 5b [1 $\mu$ M] + DAU [1.2 $\mu$ M]                  | <0.0001 | ****    |
|        |       |     | 5b: Ctr vs. 5b [10 $\mu$ M] + DAU [1.2 $\mu$ M]                 | <0.0001 | ****    |
|        |       |     | 5b: Ctr vs. 5b [30 $\mu$ M] + DAU [1.2 $\mu$ M]                 | <0.0001 | ****    |
|        | ANOVA | 4   | 5b: DAU [1.2 $\mu$ M] vs. 5b [0.1 $\mu$ M] + DAU [1.2 $\mu$ M]  | 0.7670  | ns      |
|        |       |     | 5b: DAU [1.2 $\mu$ M] vs. 5b [1 $\mu$ M] + DAU [1.2 $\mu$ M]    | 0.5634  | ns      |
|        |       |     | 5b: DAU [1.2 $\mu$ M] vs. 5b [10 $\mu$ M] + DAU [1.2 $\mu$ M]   | 0.0064  | **      |

| Figure | Test  | N | Comparison                                                      | P value | Summary |
|--------|-------|---|-----------------------------------------------------------------|---------|---------|
|        |       |   | 5b: DAU [1.2 $\mu$ M] vs. 5b [30 $\mu$ M] + DAU [1.2 $\mu$ M]   | 0.0007  | ***     |
|        | ANOVA | 4 | 5c: Ctr vs. DAU [1.2 $\mu$ M]                                   | <0.0001 | ****    |
|        |       |   | 5c: Ctr vs. 5c [0.01 $\mu$ M] + DAU [1.2 $\mu$ M]               | <0.0001 | ****    |
|        |       |   | 5c: Ctr vs. 5c [0.1 $\mu$ M] + DAU [1.2 $\mu$ M]                | <0.0001 | ****    |
|        |       |   | 5c: Ctr vs. 5c [1 $\mu$ M] + DAU [1.2 $\mu$ M]                  | <0.0001 | ****    |
|        |       |   | 5c: Ctr vs. 5c [10 $\mu$ M] + DAU [1.2 $\mu$ M]                 | 0.0019  | **      |
|        |       |   | 5c: Ctr vs. 5c [30 $\mu$ M] + DAU [1.2 $\mu$ M]                 | 0.0012  | **      |
|        |       |   | 5c: Ctr vs. 5c [100 $\mu$ M] + DAU [1.2 $\mu$ M]                | <0.0001 | ****    |
|        | ANOVA | 4 | 5c: DAU [1.2 $\mu$ M] vs. 5c [0.01 $\mu$ M] + DAU [1.2 $\mu$ M] | 0.0825  | ns      |
|        |       |   | 5c: DAU [1.2 $\mu$ M] vs. 5c [0.1 $\mu$ M] + DAU [1.2 $\mu$ M]  | 0.0102  | *       |
|        |       |   | 5c: DAU [1.2 $\mu$ M] vs. 5c [1 $\mu$ M] + DAU [1.2 $\mu$ M]    | 0.0007  | ***     |
|        |       |   | 5c: DAU [1.2 $\mu$ M] vs. 5c [10 $\mu$ M] + DAU [1.2 $\mu$ M]   | <0.0001 | ****    |
|        |       |   | 5c: DAU [1.2 $\mu$ M] vs. 5c [30 $\mu$ M] + DAU [1.2 $\mu$ M]   | <0.0001 | ****    |
|        |       |   | 5c: DAU [1.2 $\mu$ M] vs. 5c [100 $\mu$ M] + DAU [1.2 $\mu$ M]  | 0.0004  | ***     |
|        | ANOVA | 4 | 5d: Ctr vs. DAU [1.2 $\mu$ M]                                   | <0.0001 | ****    |
|        |       |   | 5d: Ctr vs. 5d [0.01 $\mu$ M] + DAU [1.2 $\mu$ M]               | <0.0001 | ****    |
|        |       |   | 5d: Ctr vs. 5d [0.1 $\mu$ M] + DAU [1.2 $\mu$ M]                | <0.0001 | ****    |
|        |       |   | 5d: Ctr vs. 5d [1 $\mu$ M] + DAU [1.2 $\mu$ M]                  | <0.0001 | ****    |
|        |       |   | 5d: Ctr vs. 5d [10 $\mu$ M] + DAU [1.2 $\mu$ M]                 | 0.0001  | ***     |
|        |       |   | 5d: Ctr vs. 5d [30 $\mu$ M] + DAU [1.2 $\mu$ M]                 | <0.0001 | ****    |
|        |       |   | 5d: Ctr vs. 5d [100 $\mu$ M] + DAU [1.2 $\mu$ M]                | <0.0001 | ****    |
|        | ANOVA | 4 | 5d: DAU [1.2 $\mu$ M] vs. 5d [0.01 $\mu$ M] + DAU [1.2 $\mu$ M] | 0.9271  | ns      |
|        |       |   | 5d: DAU [1.2 $\mu$ M] vs. 5d [0.1 $\mu$ M] + DAU [1.2 $\mu$ M]  | 0.9271  | ns      |
|        |       |   | 5d: DAU [1.2 $\mu$ M] vs. 5d [1 $\mu$ M] + DAU [1.2 $\mu$ M]    | 0.1610  | ns      |
|        |       |   | 5d: DAU [1.2 $\mu$ M] vs. 5d [10 $\mu$ M] + DAU [1.2 $\mu$ M]   | 0.0551  | ns      |
|        |       |   | 5d: DAU [1.2 $\mu$ M] vs. 5d [30 $\mu$ M] + DAU [1.2 $\mu$ M]   | 0.1732  | ns      |
|        |       |   | 5d: DAU [1.2 $\mu$ M] vs. 5d [100 $\mu$ M] + DAU [1.2 $\mu$ M]  | 0.9271  | ns      |
| Supp 4 | ANOVA | 4 | 1: Ctr vs. BNS-22 [0.01 $\mu$ M]                                | 0.9742  | ns      |
|        |       |   | 1: Ctr vs. BNS-22 [0.1 $\mu$ M]                                 | 0.9742  | ns      |
|        |       |   | 1: Ctr vs. BNS-22 [1 $\mu$ M]                                   | 0.9742  | ns      |
|        |       |   | 1: Ctr vs. BNS-22 [3 $\mu$ M]                                   | 0.9742  | ns      |

| Figure | Test  | N | Comparison                | P value | Summary |
|--------|-------|---|---------------------------|---------|---------|
|        |       |   | 1: Ctr vs. BNS-22 [10 µM] | 0.6836  | ns      |
|        | ANOVA | 4 | 1d: Ctr vs. 1d [0.1 µM]   | 0.8671  | ns      |
|        |       |   | 1d: Ctr vs. 1d [1 µM]     | 0.8671  | ns      |
|        |       |   | 1d: Ctr vs. 1d [10 µM]    | 0.1840  | ns      |
|        |       |   | 1d: Ctr vs. 1d [30 µM]    | <0.0001 | ****    |
|        |       |   | 1d: Ctr vs. 1d [100 µM]   | <0.0001 | ****    |
|        | ANOVA | 4 | 2a: Ctr vs. 2a [10 µM]    | 0.9389  | ns      |
|        |       |   | 2a: Ctr vs. 2a [30 µM]    | 0.9389  | ns      |
|        |       |   | 2a: Ctr vs. 2a [100 µM]   | 0.9389  | ns      |
|        | ANOVA | 4 | 2b: Ctr vs. 2b [10 µM]    | 0.6757  | ns      |
|        |       |   | 2b: Ctr vs. 2b [30 µM]    | 0.6757  | ns      |
|        |       |   | 2b: Ctr vs. 2b [100 µM]   | 0.6757  | ns      |
|        | ANOVA | 4 | 2c: Ctr vs. 2c [1 µM]     | 0.9468  | ns      |
|        |       |   | 2c: Ctr vs. 2c [10 µM]    | 0.9468  | ns      |
|        |       |   | 2c: Ctr vs. 2c [30 µM]    | 0.9467  | ns      |
|        |       |   | 2c: Ctr vs. 2c [100 µM]   | <0.0001 | ****    |
|        | ANOVA | 4 | 2d: Ctr vs. 2d [0.1 µM]   | 0.9148  | ns      |
|        |       |   | 2d: Ctr vs. 2d [1 µM]     | 0.9148  | ns      |
|        |       |   | 2d: Ctr vs. 2d [10 µM]    | 0.8461  | ns      |
|        |       |   | 2d: Ctr vs. 2d [30 µM]    | 0.8311  | ns      |
|        |       |   | 2d: Ctr vs. 2d [100 µM]   | <0.0001 | ****    |
|        | ANOVA | 4 | 3a: Ctr vs. 3a [1 µM]     | 0.7160  | ns      |
|        |       |   | 3a: Ctr vs. 3a [3 µM]     | 0.9575  | ns      |
|        |       |   | 3a: Ctr vs. 3a [10 µM]    | 0.9575  | ns      |
|        | ANOVA | 4 | 3b: Ctr vs. 3b [1 µM]     | 0.9627  | ns      |
|        |       |   | 3b: Ctr vs. 3b [3 µM]     | 0.9627  | ns      |
|        |       |   | 3b: Ctr vs. 3b [10 µM]    | 0.9627  | ns      |
|        | ANOVA | 4 | 3c: Ctr vs. 3c [0.1 µM]   | 0.9958  | ns      |
|        |       |   | 3c: Ctr vs. 3c [1 µM]     | 0.9958  | ns      |
|        |       |   | 3c: Ctr vs. 3c [3 µM]     | 0.9958  | ns      |
|        |       |   | 3c: Ctr vs. 3c [10 µM]    | 0.9958  | ns      |

| Figure | Test  | N | Comparison                    | P value | Summary |
|--------|-------|---|-------------------------------|---------|---------|
|        | ANOVA | 4 | 3d: Ctr vs. 3d [0.01 $\mu$ M] | 0.9976  | ns      |
|        |       |   | 3d: Ctr vs. 3d [0.1 $\mu$ M]  | 0.9976  | ns      |
|        |       |   | 3d: Ctr vs. 3d [1 $\mu$ M]    | 0.9355  | ns      |
|        |       |   | 3d: Ctr vs. 3d [10 $\mu$ M]   | 0.6273  | ns      |
|        |       |   | 3d: Ctr vs. 3d [30 $\mu$ M]   | 0.6404  | ns      |
|        | ANOVA | 4 | 4a: Ctr vs. 4a [0.1 $\mu$ M]  | 0.9789  | ns      |
|        |       |   | 4a: Ctr vs. 4a [1 $\mu$ M]    | 0.9789  | ns      |
|        |       |   | 4a: Ctr vs. 4a [10 $\mu$ M]   | 0.7172  | ns      |
|        |       |   | 4a: Ctr vs. 4a [30 $\mu$ M]   | 0.1208  | ns      |
|        | ANOVA | 4 | 4b: Ctr vs. 4b [0.01 $\mu$ M] | 0.8921  | ns      |
|        |       |   | 4b: Ctr vs. 4b [0.1 $\mu$ M]  | 0.8921  | ns      |
|        |       |   | 4b: Ctr vs. 4b [1 $\mu$ M]    | 0.8921  | ns      |
|        |       |   | 4b: Ctr vs. 4b [10 $\mu$ M]   | 0.3956  | ns      |
|        |       |   | 4b: Ctr vs. 4b [30 $\mu$ M]   | 0.3956  | ns      |
|        |       |   | 4b: Ctr vs. 4b [100 $\mu$ M]  | 0.3956  | ns      |
|        | ANOVA | 4 | 4c: Ctr vs. 4c [0.01 $\mu$ M] | 0.9900  | ns      |
|        |       |   | 4c: Ctr vs. 4c [0.1 $\mu$ M]  | 0.9900  | ns      |
|        |       |   | 4c: Ctr vs. 4c [1 $\mu$ M]    | 0.9900  | ns      |
|        |       |   | 4c: Ctr vs. 4c [10 $\mu$ M]   | 0.5694  | ns      |
|        |       |   | 4c: Ctr vs. 4c [30 $\mu$ M]   | 0.0313  | *       |
|        |       |   | 4c: Ctr vs. 4c [100 $\mu$ M]  | <0.0001 | ****    |
|        | ANOVA | 4 | 4d: Ctr vs. 4d [0.01 $\mu$ M] | 0.9052  | ns      |
|        |       |   | 4d: Ctr vs. 4d [0.1 $\mu$ M]  | 0.9518  | ns      |
|        |       |   | 4d: Ctr vs. 4d [1 $\mu$ M]    | 0.9052  | ns      |
|        |       |   | 4d: Ctr vs. 4d [10 $\mu$ M]   | 0.0052  | **      |
|        |       |   | 4d: Ctr vs. 4d [30 $\mu$ M]   | <0.0001 | ****    |
|        |       |   | 4d: Ctr vs. 4d [100 $\mu$ M]  | <0.0001 | ****    |
|        | ANOVA | 4 | 5a: Ctr vs. 5a [1 $\mu$ M]    | 0.7394  | ns      |
|        |       |   | 5a: Ctr vs. 5a [10 $\mu$ M]   | 0.9751  | ns      |
|        |       |   | 5a: Ctr vs. 5a [30 $\mu$ M]   | 0.9287  | ns      |
|        |       |   | 5a: Ctr vs. 5a [100 $\mu$ M]  | 0.9751  | ns      |

| Figure     | Test  | N | Comparison                                                             | P value | Summary |
|------------|-------|---|------------------------------------------------------------------------|---------|---------|
|            | ANOVA | 4 | 5b: Ctr vs. 5b [0.1 $\mu$ M]                                           | 0.7837  | ns      |
|            |       |   | 5b: Ctr vs. 5b [1 $\mu$ M]                                             | 0.7837  | ns      |
|            |       |   | 5b: Ctr vs. 5b [10 $\mu$ M]                                            | 0.7837  | ns      |
|            |       |   | 5b: Ctr vs. 5b [30 $\mu$ M]                                            | 0.7837  | ns      |
|            | ANOVA | 4 | 5c: Ctr vs. 5c [0.01 $\mu$ M]                                          | 0.9795  | ns      |
|            |       |   | 5c: Ctr vs. 5c [0.1 $\mu$ M]                                           | 0.9795  | ns      |
|            |       |   | 5c: Ctr vs. 5c [1 $\mu$ M]                                             | 0.9795  | ns      |
|            |       |   | 5c: Ctr vs. 5c [10 $\mu$ M]                                            | 0.5423  | ns      |
|            |       |   | 5c: Ctr vs. 5c [30 $\mu$ M]                                            | 0.5623  | ns      |
|            |       |   | 5c: Ctr vs. 5c [100 $\mu$ M]                                           | 0.1222  | ns      |
|            | ANOVA | 4 | 5d: Ctr vs. 5d [0.01 $\mu$ M]                                          | 0.9649  | ns      |
|            |       |   | 5d: Ctr vs. 5d [0.1 $\mu$ M]                                           | 0.9786  | ns      |
|            |       |   | 5d: Ctr vs. 5d [1 $\mu$ M]                                             | 0.9786  | ns      |
|            |       |   | 5d: Ctr vs. 5d [10 $\mu$ M]                                            | 0.5967  | ns      |
|            |       |   | 5d: Ctr vs. 5d [30 $\mu$ M]                                            | 0.0564  | ns      |
|            |       |   | 5d: Ctr vs. 5d [100 $\mu$ M]                                           | 0.0164  | *       |
| Supp<br>6b | ANOVA | 4 | Cmpd 6: Ctr vs. DAU [1.2 $\mu$ M]                                      | <0.0001 | ****    |
|            |       |   | Cmpd 6: Ctr vs. Cmpd 6 [0.1 $\mu$ M] + DAU [1.2 $\mu$ M]               | <0.0001 | ****    |
|            |       |   | Cmpd 6: Ctr vs. Cmpd 6 [1 $\mu$ M] + DAU [1.2 $\mu$ M]                 | <0.0001 | ****    |
|            |       |   | Cmpd 6: Ctr vs. Cmpd 6 [10 $\mu$ M] + DAU [1.2 $\mu$ M]                | <0.0001 | ****    |
|            |       |   | Cmpd 6: Ctr vs. Cmpd 6 [30 $\mu$ M] + DAU [1.2 $\mu$ M]                | <0.0001 | ****    |
|            |       |   | Cmpd 6: Ctr vs. Cmpd 6 [100 $\mu$ M] + DAU [1.2 $\mu$ M]               | <0.0001 | ****    |
|            | ANOVA | 4 | Cmpd 6: DAU [1.2 $\mu$ M] vs. Cmpd 6 [0.1 $\mu$ M] + DAU [1.2 $\mu$ M] | 0.8741  | ns      |
|            |       |   | Cmpd 6: DAU [1.2 $\mu$ M] vs. Cmpd 6 [1 $\mu$ M] + DAU [1.2 $\mu$ M]   | 0.8741  | ns      |
|            |       |   | Cmpd 6: DAU [1.2 $\mu$ M] vs. Cmpd 6 [10 $\mu$ M] + DAU [1.2 $\mu$ M]  | 0.0491  | *       |
|            |       |   | Cmpd 6: DAU [1.2 $\mu$ M] vs. Cmpd 6 [30 $\mu$ M] + DAU [1.2 $\mu$ M]  | 0.0064  | **      |
|            |       |   | Cmpd 6: DAU [1.2 $\mu$ M] vs. Cmpd 6 [100 $\mu$ M] + DAU [1.2 $\mu$ M] | 0.0491  | *       |
|            | ANOVA | 4 | Cmpd 7: Ctr vs. DAU [1.2 $\mu$ M]                                      | <0.0001 | ****    |
|            |       |   | Cmpd 7: Ctr vs. Cmpd 7 [0.01 $\mu$ M] + DAU [1.2 $\mu$ M]              | <0.0001 | ****    |



| Figure | Test  | N | Comparison                                                              | P value | Summary |
|--------|-------|---|-------------------------------------------------------------------------|---------|---------|
|        |       |   | Cmpd 7: Ctr vs. Cmpd 7 [0.1 $\mu$ M] + DAU [1.2 $\mu$ M]                | <0.0001 | ****    |
|        |       |   | Cmpd 7: Ctr vs. Cmpd 7 [1 $\mu$ M] + DAU [1.2 $\mu$ M]                  | <0.0001 | ****    |
|        |       |   | Cmpd 7: Ctr vs. Cmpd 7 [10 $\mu$ M] + DAU [1.2 $\mu$ M]                 | 0.0002  | ***     |
|        |       |   | Cmpd 7: Ctr vs. Cmpd 7 [30 $\mu$ M] + DAU [1.2 $\mu$ M]                 | <0.0001 | ****    |
|        |       |   | Cmpd 7: Ctr vs. Cmpd 7 [100 $\mu$ M] + DAU [1.2 $\mu$ M]                | <0.0001 | ****    |
|        | ANOVA | 4 | Cmpd 7: DAU [1.2 $\mu$ M] vs. Cmpd 7 [0.01 $\mu$ M] + DAU [1.2 $\mu$ M] | 0.5381  | ns      |
|        |       |   | Cmpd 7: DAU [1.2 $\mu$ M] vs. Cmpd 7 [0.1 $\mu$ M] + DAU [1.2 $\mu$ M]  | 0.5381  | ns      |
|        |       |   | Cmpd 7: DAU [1.2 $\mu$ M] vs. Cmpd 7 [1 $\mu$ M] + DAU [1.2 $\mu$ M]    | 0.1928  | ns      |
|        |       |   | Cmpd 7: DAU [1.2 $\mu$ M] vs. Cmpd 7 [10 $\mu$ M] + DAU [1.2 $\mu$ M]   | 0.0077  | **      |
|        |       |   | Cmpd 7: DAU [1.2 $\mu$ M] vs. Cmpd 7 [30 $\mu$ M] + DAU [1.2 $\mu$ M]   | 0.0219  | *       |
|        |       |   | Cmpd 7: DAU [1.2 $\mu$ M] vs. Cmpd 7 [100 $\mu$ M] + DAU [1.2 $\mu$ M]  | 0.1011  | ns      |
|        | ANOVA | 4 | Cmpd 8: Ctr vs. DAU [1.2 $\mu$ M]                                       | <0.0001 | ****    |
|        |       |   | Cmpd 8: Ctr vs. Cmpd 8 [0.01 $\mu$ M] + DAU [1.2 $\mu$ M]               | <0.0001 | ****    |
|        |       |   | Cmpd 8: Ctr vs. Cmpd 8 [0.1 $\mu$ M] + DAU [1.2 $\mu$ M]                | <0.0001 | ****    |
|        |       |   | Cmpd 8: Ctr vs. Cmpd 8 [1 $\mu$ M] + DAU [1.2 $\mu$ M]                  | <0.0001 | ****    |
|        |       |   | Cmpd 8: Ctr vs. Cmpd 8 [10 $\mu$ M] + DAU [1.2 $\mu$ M]                 | <0.0001 | ****    |
|        |       |   | Cmpd 8: Ctr vs. Cmpd 8 [30 $\mu$ M] + DAU [1.2 $\mu$ M]                 | <0.0001 | ****    |
|        |       |   | Cmpd 8: Ctr vs. Cmpd 8 [100 $\mu$ M] + DAU [1.2 $\mu$ M]                | <0.0001 | ****    |
|        | ANOVA | 4 | Cmpd 8: DAU [1.2 $\mu$ M] vs. Cmpd 8 [0.01 $\mu$ M] + DAU [1.2 $\mu$ M] | 0.3717  | ns      |
|        |       |   | Cmpd 8: DAU [1.2 $\mu$ M] vs. Cmpd 8 [0.1 $\mu$ M] + DAU [1.2 $\mu$ M]  | 0.3717  | ns      |
|        |       |   | Cmpd 8: DAU [1.2 $\mu$ M] vs. Cmpd 8 [1 $\mu$ M] + DAU [1.2 $\mu$ M]    | 0.0122  | *       |
|        |       |   | Cmpd 8: DAU [1.2 $\mu$ M] vs. Cmpd 8 [10 $\mu$ M] + DAU [1.2 $\mu$ M]   | 0.0012  | **      |
|        |       |   | Cmpd 8: DAU [1.2 $\mu$ M] vs. Cmpd 8 [30 $\mu$ M] + DAU [1.2 $\mu$ M]   | 0.0054  | **      |
|        |       |   | Cmpd 8: DAU [1.2 $\mu$ M] vs. Cmpd 8 [100 $\mu$ M] + DAU [1.2 $\mu$ M]  | 0.3717  | ns      |
|        | ANOVA | 4 | topobexin (9): Ctr vs. DAU [1.2 $\mu$ M]                                | <0.0001 | ****    |
|        |       |   | topobexin (9): Ctr vs. topobexin (9) [0.01 $\mu$ M] + DAU [1.2 $\mu$ M] | <0.0001 | ****    |

| Figure  | Test  | N | Comparison                                                                            | P value | Summary |
|---------|-------|---|---------------------------------------------------------------------------------------|---------|---------|
|         |       |   | topobexin (9): Ctr vs. topobexin (9) [0.1 $\mu$ M] + DAU [1.2 $\mu$ M]                | <0.0001 | ****    |
|         |       |   | topobexin (9): Ctr vs. topobexin (9) [1 $\mu$ M] + DAU [1.2 $\mu$ M]                  | <0.0001 | ****    |
|         |       |   | topobexin (9): Ctr vs. topobexin (9) [10 $\mu$ M] + DAU [1.2 $\mu$ M]                 | 0.0037  | **      |
|         |       |   | topobexin (9): Ctr vs. topobexin (9) [30 $\mu$ M] + DAU [1.2 $\mu$ M]                 | 0.0014  | **      |
|         |       |   | topobexin (9): Ctr vs. topobexin (9) [100 $\mu$ M] + DAU [1.2 $\mu$ M]                | 0.0003  | ***     |
|         | ANOVA | 4 | topobexin (9): DAU [1.2 $\mu$ M] vs. topobexin (9) [0.01 $\mu$ M] + DAU [1.2 $\mu$ M] | 0.6901  | ns      |
|         |       |   | topobexin (9): DAU [1.2 $\mu$ M] vs. topobexin (9) [0.1 $\mu$ M] + DAU [1.2 $\mu$ M]  | 0.5031  | ns      |
|         |       |   | topobexin (9): DAU [1.2 $\mu$ M] vs. topobexin (9) [1 $\mu$ M] + DAU [1.2 $\mu$ M]    | 0.0062  | **      |
|         |       |   | topobexin (9): DAU [1.2 $\mu$ M] vs. topobexin (9) [10 $\mu$ M] + DAU [1.2 $\mu$ M]   | 0.0002  | ***     |
|         |       |   | topobexin (9): DAU [1.2 $\mu$ M] vs. topobexin (9) [30 $\mu$ M] + DAU [1.2 $\mu$ M]   | 0.0003  | ***     |
|         |       |   | topobexin (9): DAU [1.2 $\mu$ M] vs. topobexin (9) [100 $\mu$ M] + DAU [1.2 $\mu$ M]  | 0.0009  | ***     |
| Supp 6c | ANOVA | 4 | Cmpd 6: Ctr vs. Cmpd 6 [0.1 $\mu$ M]                                                  | 0.9451  | ns      |
|         |       |   | Cmpd 6: Ctr vs. Cmpd 6 [1 $\mu$ M]                                                    | 0.9451  | ns      |
|         |       |   | Cmpd 6: Ctr vs. Cmpd 6 [10 $\mu$ M]                                                   | 0.9451  | ns      |
|         |       |   | Cmpd 6: Ctr vs. Cmpd 6 [30 $\mu$ M]                                                   | 0.9451  | ns      |
|         |       |   | Cmpd 6: Ctr vs. Cmpd 6 [100 $\mu$ M]                                                  | 0.1287  | ns      |
|         | ANOVA | 4 | Cmpd 7: Ctr vs. Cmpd 7 [0.01 $\mu$ M]                                                 | 0.9989  | ns      |
|         |       |   | Cmpd 7: Ctr vs. Cmpd 7 [0.1 $\mu$ M]                                                  | 0.9989  | ns      |
|         |       |   | Cmpd 7: Ctr vs. Cmpd 7 [1 $\mu$ M]                                                    | 0.9989  | ns      |
|         |       |   | Cmpd 7: Ctr vs. Cmpd 7 [10 $\mu$ M]                                                   | 0.9989  | ns      |
|         |       |   | Cmpd 7: Ctr vs. Cmpd 7 [30 $\mu$ M]                                                   | 0.6692  | ns      |
|         |       |   | Cmpd 7: Ctr vs. Cmpd 7 [100 $\mu$ M]                                                  | 0.0026  | **      |
|         | ANOVA | 4 | Cmpd 8: Ctr vs. Cmpd 8 [0.01 $\mu$ M]                                                 | 0.9615  | ns      |
|         |       |   | Cmpd 8: Ctr vs. Cmpd 8 [0.1 $\mu$ M]                                                  | 0.9676  | ns      |

| Figure  | Test                            | N | Comparison                                                                                        | P value | Summary |
|---------|---------------------------------|---|---------------------------------------------------------------------------------------------------|---------|---------|
|         |                                 |   | Cmpd 8: Ctr vs. Cmpd 8 [1 $\mu$ M]                                                                | 0.9676  | ns      |
|         |                                 |   | Cmpd 8: Ctr vs. Cmpd 8 [10 $\mu$ M]                                                               | 0.6402  | ns      |
|         |                                 |   | Cmpd 8: Ctr vs. Cmpd 8 [30 $\mu$ M]                                                               | 0.0322  | *       |
|         |                                 |   | Cmpd 8: Ctr vs. Cmpd 8 [100 $\mu$ M]                                                              | <0.0001 | ****    |
|         | ANOVA                           | 4 | topobexin (9): Ctr vs. topobexin (9) [0.01 $\mu$ M]                                               | 0.9983  | ns      |
|         |                                 |   | topobexin (9): Ctr vs. topobexin (9) [0.1 $\mu$ M]                                                | 0.9983  | ns      |
|         |                                 |   | topobexin (9): Ctr vs. topobexin (9) [1 $\mu$ M]                                                  | 0.9642  | ns      |
|         |                                 |   | topobexin (9): Ctr vs. topobexin (9) [10 $\mu$ M]                                                 | 0.9983  | ns      |
|         |                                 |   | topobexin (9): Ctr vs. topobexin (9) [30 $\mu$ M]                                                 | 0.9983  | ns      |
|         |                                 |   | topobexin (9): Ctr vs. topobexin (9) [100 $\mu$ M]                                                | 0.9642  | ns      |
| Supp 8a | ANOVA                           | 4 | DAU [1.2 $\mu$ M] vs. dexrazoxane [0.1 $\mu$ M] + DAU [1.2 $\mu$ M]                               | 0.2188  | ns      |
|         |                                 |   | DAU [1.2 $\mu$ M] vs. dexrazoxane [1 $\mu$ M] + DAU [1.2 $\mu$ M]                                 | 0.0023  | **      |
|         |                                 |   | DAU [1.2 $\mu$ M] vs. dexrazoxane [10 $\mu$ M] + DAU [1.2 $\mu$ M]                                | 0.0007  | ***     |
|         |                                 |   | DAU [1.2 $\mu$ M] vs. dexrazoxane [100 $\mu$ M] + DAU [1.2 $\mu$ M]                               | <0.0001 | ****    |
|         |                                 |   | DAU [1.2 $\mu$ M] vs. topobexin (9) [0.1 $\mu$ M] + DAU [1.2 $\mu$ M]                             | 0.0004  | ***     |
|         |                                 |   | DAU [1.2 $\mu$ M] vs. topobexin (9) [1 $\mu$ M] + DAU [1.2 $\mu$ M]                               | <0.0001 | ****    |
|         |                                 |   | DAU [1.2 $\mu$ M] vs. topobexin (9) [10 $\mu$ M] + DAU [1.2 $\mu$ M]                              | <0.0001 | ****    |
|         |                                 |   | DAU [1.2 $\mu$ M] vs. topobexin (9) [100 $\mu$ M] + DAU [1.2 $\mu$ M]                             | <0.0001 | ****    |
|         | Ratio paired t-test, two-tailed | 4 | dexrazoxane [0.1 $\mu$ M] + DAU [1.2 $\mu$ M] vs. topobexin (9) [0.1 $\mu$ M] + DAU [1.2 $\mu$ M] | 0.0356  | *       |
|         |                                 |   | dexrazoxane [1 $\mu$ M] + DAU [1.2 $\mu$ M] vs. topobexin (9) [1 $\mu$ M] + DAU [1.2 $\mu$ M]     | 0.0317  | *       |
|         |                                 |   | dexrazoxane [10 $\mu$ M] + DAU [1.2 $\mu$ M] vs. topobexin (9) [10 $\mu$ M] + DAU [1.2 $\mu$ M]   | 0.0013  | **      |
|         |                                 |   | dexrazoxane [100 $\mu$ M] + DAU [1.2 $\mu$ M] vs. topobexin (9) [100 $\mu$ M] + DAU [1.2 $\mu$ M] | 0.0075  | **      |
| Supp 8c | ANOVA                           | 4 | Ctr vs. topobexin (9) [0.01 $\mu$ M]                                                              | 0.8162  | ns      |
|         |                                 |   | Ctr vs. topobexin (9) [0.1 $\mu$ M]                                                               | 0.8616  | ns      |
|         |                                 |   | Ctr vs. topobexin (9) [1 $\mu$ M]                                                                 | 0.1626  | ns      |
|         |                                 |   | Ctr vs. topobexin (9) [10 $\mu$ M]                                                                | <0.0001 | ****    |
|         |                                 |   | Ctr vs. topobexin (9) [30 $\mu$ M]                                                                | <0.0001 | ****    |

| Figure  | Test  | N | Comparison                                             | P value | Summary |
|---------|-------|---|--------------------------------------------------------|---------|---------|
|         |       |   | Ctr vs. topobexin (9) [100 µM]                         | <0.0001 | ****    |
|         |       |   | Ctr vs. DAU [1.2 µM]                                   | <0.0001 | ****    |
|         |       |   | Ctr vs. topobexin (9) [0.1 µM] + DAU [1.2 µM]          | <0.0001 | ****    |
|         |       |   | Ctr vs. topobexin (9) [1 µM] + DAU [1.2 µM]            | <0.0001 | ****    |
|         |       |   | Ctr vs. topobexin (9) [10 µM] + DAU [1.2 µM]           | <0.0001 | ****    |
|         |       |   | Ctr vs. topobexin (9) [30 µM] + DAU [1.2 µM]           | <0.0001 | ****    |
|         |       |   | Ctr vs. topobexin (9) [100 µM] + DAU [1.2 µM]          | <0.0001 | ****    |
|         | ANOVA | 4 | DAU [1.2 µM] vs. topobexin (9) [0.1 µM] + DAU [1.2 µM] | 0.8454  | ns      |
|         |       |   | DAU [1.2 µM] vs. topobexin (9) [1 µM] + DAU [1.2 µM]   | 0.8454  | ns      |
|         |       |   | DAU [1.2 µM] vs. topobexin (9) [10 µM] + DAU [1.2 µM]  | 0.0026  | **      |
|         |       |   | DAU [1.2 µM] vs. topobexin (9) [30 µM] + DAU [1.2 µM]  | 0.0002  | ***     |
|         |       |   | DAU [1.2 µM] vs. topobexin (9) [100 µM] + DAU [1.2 µM] | <0.0001 | ****    |
| Supp 8d | ANOVA | 4 | Ctr vs. topobexin (9) [0.1 µM]                         | 0.9953  | ns      |
|         |       |   | Ctr vs. topobexin (9) [0.3 µM]                         | 0.9953  | ns      |
|         |       |   | Ctr vs. topobexin (9) [1 µM]                           | 0.9953  | ns      |
|         |       |   | Ctr vs. topobexin (9) [3 µM]                           | 0.9953  | ns      |
|         |       |   | Ctr vs. topobexin (9) [10 µM]                          | 0.9953  | ns      |
|         |       |   | Ctr vs. DAU [1.2 µM]                                   | <0.0001 | ****    |
|         |       |   | Ctr vs. topobexin (9) [0.1 µM] + DAU [1.2 µM]          | <0.0001 | ****    |
|         |       |   | Ctr vs. topobexin (9) [0.3 µM] + DAU [1.2 µM]          | 0.0011  | **      |
|         |       |   | Ctr vs. topobexin (9) [1 µM] + DAU [1.2 µM]            | 0.0148  | *       |
|         |       |   | Ctr vs. topobexin (9) [3 µM] + DAU [1.2 µM]            | 0.0148  | *       |
|         |       |   | Ctr vs. topobexin (9) [10 µM] + DAU [1.2 µM]           | 0.9102  | ns      |
|         |       |   | DAU [1.2 µM] vs. topobexin (9) [0.1 µM] + DAU [1.2 µM] | 0.334   | ns      |
|         |       |   | DAU [1.2 µM] vs. topobexin (9) [0.3 µM] + DAU [1.2 µM] | 0.1361  | ns      |
|         |       |   | DAU [1.2 µM] vs. topobexin (9) [1 µM] + DAU [1.2 µM]   | 0.0582  | ns      |
|         |       |   | DAU [1.2 µM] vs. topobexin (9) [3 µM] + DAU [1.2 µM]   | 0.0582  | ns      |
|         |       |   | DAU [1.2 µM] vs. topobexin (9) [10 µM] + DAU [1.2 µM]  | 0.0013  | **      |

## Supplementary Methods – Chemistry (Synthetic procedures and characterization of compounds)

The prepared compounds were characterized using <sup>1</sup>H NMR and <sup>13</sup>C NMR spectroscopy. The purities of the prepared compounds were determined using elemental analysis or HPLC-HRMS experiments. All chemicals used in the syntheses were obtained from Sigma-Aldrich (Schnelldorf, Germany) and PENTA s.r.o. (Prague, Czech Republic) and were used as received. TLC separations were performed on Merck aluminum plates with silica gel 60 F254. Merck Kieselgel 60 (0.040-0.063 mm) was used for column chromatography. Melting points were recorded with a Büchi B-545 apparatus (BUCHI Labortechnik AG, Flawil, Switzerland) and are uncorrected. <sup>1</sup>H and <sup>13</sup>C NMR spectra were recorded using Varian Mercury Vx BB 300, VNMR S500 NMR (Varian, Palo Alto, CA, USA) or Jeol JNM-ECZ600R (JEOL Ltd., Akishima, Tokyo, Japan) spectrometers. Chemical shifts are reported as  $\delta$  values in parts per million (ppm) and were indirectly referenced to tetramethylsilane (TMS) via the solvent signal. Elemental analyses were performed on an Automatic Microanalyzer EA1110CE (Fisons Instruments S.p.A., Milano, Italy). UHPLC system Acquity UPLC I-class (Waters, Millford, USA) coupled to high resolution mass spectrometer (HRMS) Synapt G2Si (Waters, Manchester, UK) based on Q-TOF were used for HRMS spectra measurement.

**Scheme 1.** Synthesis of BNS-22 (**1c**) and its analog **1d**

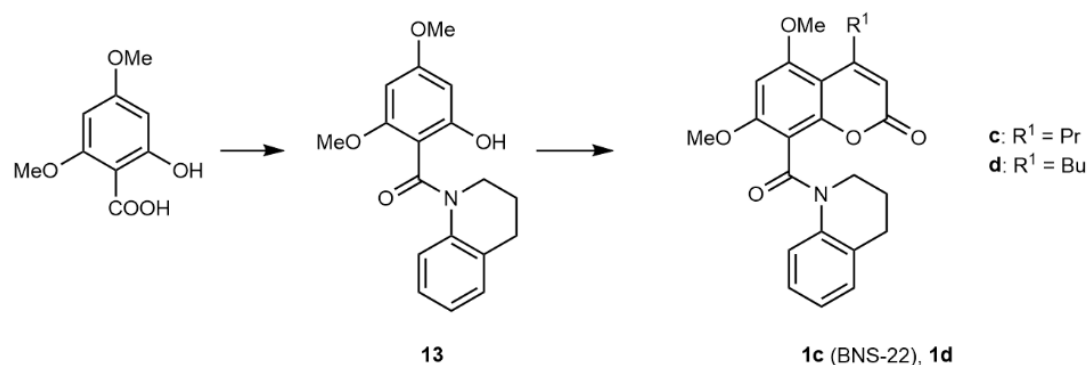

**General Method 1.** A mixture of *N*-(2-hydroxy-4,6-dimethoxy)benzoyl-1,2,3,4-tetrahydroquinoline **13** (0.7 g, 2.23 mmol), corresponding ethyl ester of 3-oxocarboxylic acid (2.34 mmol) and methane sulfonic acid (7 ml) was stirred for 24 h at RT. The reaction mixture was poured into ice water (150 ml) and stirred for 30 min. The aqueous layer was extracted with EtOAc (2 × 100 ml), combined organic layer was dried over anhydrous sodium sulfate, and concentrated under reduced pressure. The product was purified by column chromatography (mobile phase: hexan/EtOAc, 2:1 or hexan/EtOAc/acetic acid, 20:20:1).

**4-Butyl-5,7-dimethoxy-8-(1,2,3,4-tetrahydroquinolin-1-carbonyl)-2H-chromen-2-one (1d):** The product was prepared according to General Method 1. Yield: 46 % as a beige solid; mp 129-131 °C as a dynamic equilibrium of *cis-trans* amide bond rotamers distinguishable by NMR in a ratio 2.2:1. <sup>1</sup>H NMR (500 MHz, DMSO) δ 8.08 (1H, d, *J*=8.6 Hz, CH, **B**), 7.22-7.15 (2H, m, CH, **B**), 7.13-7.05 (1H, m, CH, **A**, 1H, m, CH, **B**), 6.91 (1H, t, *J*=7.3 Hz, CH, **A**), 6.77-6.70 (1H, m, CH, **A**), 6.56-6.50 (2H, m, CH, **A**, 1H, m, CH, **B**), 6.05 (1H, s, CH, **B**), 5.89 (1H, s, CH, **A**), 4.05-3.97 (1H, m, CH<sub>2</sub>, **A**), 4.01 (3H, s, CH<sub>3</sub>, **B**), 3.96 (3H, s, CH<sub>3</sub>, **B**), 3.91 (3H, s, CH<sub>3</sub>, **A**), 3.80 (3H, s, CH<sub>3</sub>, **A**), 3.73-3.64 (1H, m, CH<sub>2</sub>, **A**), 3.46-3.40 (2H, m, CH<sub>2</sub>, **B**), 2.94-2.67 (4H, m, CH<sub>2</sub>, **A**, 4H, m, CH<sub>2</sub>, **B**), 2.16-2.05 (1H, m, CH<sub>2</sub>, **A**), 2.00-1.82 (1H, m, CH<sub>2</sub>, **A**, 2H, m, CH<sub>2</sub>, **B**), 1.57-1.12 (4H, m, CH<sub>2</sub>, **A**, 4H, m, CH<sub>2</sub>, **B**), 0.95 (3H, t, *J*=7.3 Hz, CH<sub>3</sub>, **B**), 0.88 (3H, t, *J*=7.1 Hz, CH<sub>3</sub>, **A**). <sup>13</sup>C NMR (125 MHz, DMSO) **isomer A**: δ 163.5, 159.3, 159.2, 158.9, 158.0, 152.1, 138.6, 133.2, 128.0, 125.3, 125.3, 122.8, 110.3, 108.1, 102.5, 92.5, 56.6, 56.5, 42.5, 35.6, 31.5, 26.1, 23.5, 22.2.

13.9.  $^{13}\text{C}$  NMR (125 MHz, DMSO) **isomer B**:  $\delta$  163.3, 159.32, 159.1, 158.4, 158.3, 151.8, 137.7, 129.8, 129.3, 125.5, 124.6, 124.1, 110.7, 107.9, 103.1, 92.9, 56.8, 56.7, 46.5, 35.8, 31.7, 26.6, 23.3, 22.4, 14.0. HRMS ( $m/z$ ):  $[\text{M}+\text{H}]^+$  calcd. for  $\text{C}_{25}\text{H}_{28}\text{NO}_5$ , 422.1962; found, 422.1963; Elem. Anal. Calcd for  $\text{C}_{25}\text{H}_{27}\text{NO}_5$ : C, 71.24; H, 6.46; N, 3.32. Found: C, 71.62; H, 6.83; N, 3.98.

**Scheme 2.** Synthesis of compounds **2a-d**.

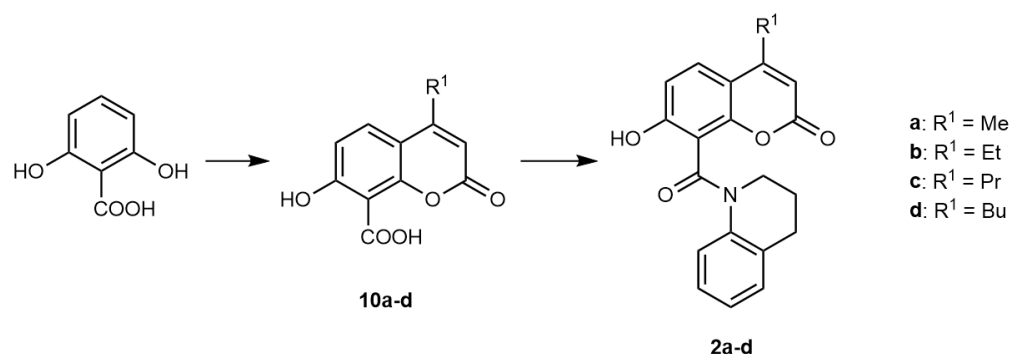

**General Method 2. Synthesis of carboxylic acids 10a-d.** Methyl or ethyl ester of corresponding aliphatic 3-oxocarboxylic acid (14.6 mmol) was added dropwise to a suspension of 2,6-dihydroxybenzoic acid (1.5 g, 9.73 mmol) in conc.  $\text{H}_2\text{SO}_4$  (4.6 g, 2.5 mL, 45 mmol). The reaction mixture was heated to 75 °C for 2-5 h. After cooling to RT, the reaction mixture was poured into ice water (150 mL) and a precipitation was filtered off, washed with water to neutral pH and dried over  $\text{P}_2\text{O}_5$ .

*7-Hydroxy-4-methyl-2-oxo-2H-chromene-8-carboxylic acid (10a)*: The product was prepared according to General Method 2. Ethyl ester of 3-oxobutyric acid was used as a substrate. The reaction mixture was heated to 75 °C for 2 h. Yield: 70% as a white solid; mp 255-257 °C.  $^1\text{H}$  NMR (500 MHz, DMSO)  $\delta$  7.66 (d,  $J = 8.7$  Hz, 1H), 6.90 (d,  $J = 8.8$  Hz, 1H), 6.18 (d,  $J = 1.3$  Hz, 1H), 2.37 (d,  $J = 1.2$  Hz, 3H).  $^{13}\text{C}$  NMR (126 MHz, DMSO)  $\delta$  166.26, 159.81, 158.56, 153.86, 151.42, 127.58, 112.93, 112.03, 110.76, 110.70, 18.49. HRMS ( $m/z$ ):  $[\text{M}+\text{H}]^+$  calcd. for  $\text{C}_{11}\text{H}_9\text{O}_5$ , 221.0444; found, 221.0450; Elem. Anal. Calcd. for  $\text{C}_{11}\text{H}_8\text{O}_5$ : C, 60.01; H, 3.66. Found: C, 59.62; H, 3.82.

*4-Ethyl-7-hydroxy-2-oxo-2H-chromene-8-carboxylic acid (10b)*: The product was prepared according to General Method 2. Ethyl ester of 3-oxovaleric acid was used as a substrate. The reaction mixture was heated to 75 °C for 2 h. Yield: 61% as a white solid; mp 234-236 °C.  $^1\text{H}$  NMR (500 MHz, DMSO)  $\delta$  11.05 (s, 1H), 7.70 (d,  $J = 8.8$  Hz, 1H), 6.90 (d,  $J = 8.8$  Hz, 1H), 6.13 (d,  $J = 1.4$  Hz, 1H), 2.77 (qd,  $J = 7.4, 1.2$  Hz, 2H), 1.20 (t,  $J = 7.4$  Hz, 3H).  $^{13}\text{C}$  NMR (126 MHz, DMSO)  $\delta$  166.16, 160.00, 158.59, 158.34, 151.51, 127.06, 112.88, 111.12, 110.92, 108.88, 24.35, 12.54. HRMS ( $m/z$ ):  $[\text{M}+\text{H}]^+$  calcd. for  $\text{C}_{12}\text{H}_{11}\text{O}_5$ , 235.0601; found, 235.0609; Elem. Anal. Calcd. for  $\text{C}_{12}\text{H}_{10}\text{O}_5$ : C, 61.54; H, 4.30. Found: C, 61.16; H, 4.14.

*7-Hydroxy-4-propyl-2-oxo-2H-chromene-8-carboxylic acid (10c)*: The product was prepared according to General Method 2. Ethyl ester of 3-oxohexanoic acid was used as a substrate. The reaction mixture was heated to 75 °C for 5 h. Yield: 51% as a white solid; mp 210-212 °C.  $^1\text{H}$  NMR (500 MHz, DMSO)  $\delta$  7.71 (d,  $J = 8.8$  Hz, 1H), 6.90 (d,  $J = 8.8$  Hz, 1H), 6.13 (s, 1H), 2.71 (t,  $J = 7.6$  Hz, 2H), 1.61 (h,  $J = 7.4$  Hz, 2H), 0.95 (t,  $J = 7.3$  Hz, 3H).  $^{13}\text{C}$  NMR (126 MHz, DMSO)  $\delta$  166.13, 159.85, 158.36, 157.11, 151.63, 127.24,



112.94, 111.16, 110.96, 109.83, 33.11, 21.56, 13.81. HRMS (m/z): [M+H]<sup>+</sup> calcd. for C<sub>13</sub>H<sub>13</sub>O<sub>5</sub>, 249.0757; found, 249.0765; Elem. Anal. Calcd. for C<sub>13</sub>H<sub>12</sub>O<sub>5</sub>: C, 62.9; H, 4.87. Found: C, 62.92; H, 4.81.

**4-Butyl-7-hydroxy-2-oxo-2H-chromene-8-carboxylic acid (10d):** The product was prepared according to General Method 2. Methyl ester of 3-oxoheptanoic acid was used as a substrate. The reaction mixture was heated to 75 °C for 3 h. Yield: 73% as a white solid; mp 179-181 °C. <sup>1</sup>H NMR (600 MHz, DMSO-*D*<sub>6</sub>) δ 7.67 (d, *J* = 8.9 Hz, 1H), 6.87 (d, *J* = 8.8 Hz, 1H), 6.10 (s, 1H), 2.73 – 2.64 (m, 2H), 1.58 – 1.48 (m, 2H), 1.37 – 1.31 (m, 2H), 0.87 (t, *J* = 7.4 Hz, 3H). <sup>13</sup>C NMR (151 MHz, DMSO-*D*<sub>6</sub>) δ 166.50, 160.22, 158.77, 157.73, 152.01, 127.58, 113.33, 111.48, 111.30, 110.09, 31.30, 30.75, 22.43, 14.20. HRMS (m/z): [M+H]<sup>+</sup> calcd. for C<sub>14</sub>H<sub>15</sub>O<sub>5</sub>, 263.0914; found, 263.0923; Elem. Anal. Calcd. for C<sub>14</sub>H<sub>14</sub>O<sub>5</sub>: C, 64.12; H, 5.38. Found: C, 64.08; H, 5.48.

**General Method 3. Synthesis of compounds 2a-d.** To a solution of corresponding carboxylic acid **10a-d** (4.27 mmol) and 1,2,3,4-tetrahydroquinoline (2.16 g, 2.04 mL, 16.2 mmol) in CH<sub>2</sub>Cl<sub>2</sub> (50 mL) EDC.HCl (1.88 g, 9.83 mmol) and DMAP (26 mg, 0.214 mmol) were added. The reaction mixture was stirred at room temperature (RT) for 48-72 h. Then, the reaction mixture was washed with water (2 × 50 mL), 1M HCl (2 × 50 mL), and brine (1 × 50 mL). Organic phase was dried over anhydrous sodium sulfate and concentrated under reduced pressure. The product was purified by column chromatography (mobile phase: hexane/EtOAc/acetic acid, 20:20:1).

**7-Hydroxy-4-methyl-8-(1,2,3,4-tetrahydroquinoline-1-carbonyl)-2H-chromen-2-one (2a):** The product was prepared according to General Method 3 using substrate **10a**. The reaction mixture was stirred at RT for 48 h. Yield: 64% as a white solid; mp 241-243 °C as a dynamic equilibrium of *cis-trans* amide bond rotamers distinguishable by NMR in a ratio 2.2:1. <sup>1</sup>H NMR (500 MHz, DMSO) δ 11.02 (1H, bs, OH, **A**, 1H, bs, OH, **B**), 8.11 (1H, d, *J* = 8.3 Hz, CH, **B**), 7.67 (1H, d, *J* = 8.3 Hz, CH, **B**), 7.50 (1H, d, *J* = 8.8 Hz, CH, **A**), 7.23-7.18 (2H, m, CH, **B**), 7.13-7.06 (1H, m, CH, **A**, 1H, m, CH, **B**), 6.95 (1H, d, *J* = 8.8 Hz, CH, **B**), 6.90 (1H, t, *J* = 7.3 Hz, CH, **A**), 6.76 (1H, d, *J* = 8.8 Hz, CH, **A**), 6.73 (1H, t, *J* = 7.3 Hz, CH, **A**), 6.66 (1H, d, *J* = 7.3 Hz, CH, **A**), 6.19 (1H, s, CH, **B**), 6.03 (1H, s, CH, **A**), 4.14-4.04 (1H, m, CH<sub>2</sub>, **A**), 3.71-3.61 (1H, m, CH<sub>2</sub>, **A**), 3.50-3.42 (2H, m, CH<sub>2</sub>, **B**), 2.91-2.68 (2H, m, CH<sub>2</sub>, **A**, 2H, m, CH<sub>2</sub>, **B**), 2.40 (3H, s, CH<sub>3</sub>, **B**), 2.28 (3H, s, CH<sub>3</sub>, **A**), 2.20-2.09 (1H, m, CH<sub>2</sub>, **A**), 1.99-1.81 (1H, m, CH<sub>2</sub>, **A**, 2H, m, CH<sub>2</sub>, **B**). **Isomer A:** <sup>13</sup>C NMR (125 MHz, DMSO) δ 163.8, 159.5, 158.2, 153.7, 150.8, 138.5, 133.3, 128.1, 126.7, 125.4, 125.3, 122.8, 113.5, 112.5, 111.5, 110.3, 42.5, 26.2, 23.6, 18.3. **Isomer B:** <sup>13</sup>C NMR (125 MHz, DMSO) δ 163.6, 159.9, 157.2, 153.9, 150.7, 137.7, 129.8, 129.3, 126.7, 125.5, 124.6, 124.2, 113.2, 112.9, 112.2, 110.7, 46.5, 26.6, 23.4, 18.4. HRMS (m/z): [M+H]<sup>+</sup> calcd. for C<sub>20</sub>H<sub>18</sub>NO<sub>4</sub>, 336.1230; found, 336.1240; Elem. Anal. Calcd for C<sub>20</sub>H<sub>17</sub>NO<sub>4</sub>: C, 71.63; H, 5.11; N, 4.18. Found: C, 71.38; H, 5.18; N, 4.31.

**4-Ethyl-7-hydroxy-8-(1,2,3,4-tetrahydroquinolin-1-carbonyl)-2H-chromen-2-one (2b):** The product was prepared according to General Method 3 using substrate **10b**. The reaction mixture was stirred at RT for 72 h. Yield: 64% as a white solid; mp 218-219 °C as a dynamic equilibrium of *cis-trans* amide bond rotamers distinguishable by NMR in a ratio 2:1. <sup>1</sup>H NMR (500 MHz, DMSO) δ 10.96 (1H, bs, OH, **B**), 10.87 (1H,

bs, OH, **A**), 8.11 (1H, d,  $J = 8.3$  Hz, CH, **B**), 7.72 (1H, d,  $J = 8.3$  Hz, CH, **B**), 7.55 (1H, d,  $J = 8.8$  Hz, CH, **A**), 7.23-7.17 (2H, m, CH, **B**), 7.13-7.05 (1H, m, CH, **A**, 1H, m, CH, **B**), 6.96 (1H, d,  $J = 8.8$  Hz, CH, **B**), 6.90 (1H, dt,  $J = 7.6$  Hz,  $J = 1.0$  Hz, CH, **A**), 6.77 (1H, d,  $J = 8.8$  Hz, CH, **A**), 6.73 (1H, t,  $J = 7.6$  Hz, CH, **A**), 6.65 (1H, d,  $J = 7.6$  Hz, CH, **A**), 6.15 (1H, s, CH, **B**) 5.98 (1H, s, CH, **A**), 4.13-4.06 (1H, m, CH<sub>2</sub>, **A**), 3.69-3.62 (1H, m, CH<sub>2</sub>, **A**), 3.49-3.43 (2H, m, CH<sub>2</sub>, **B**), 2.95-2.60 (4H, m, CH<sub>2</sub>, **A**, 4H, m, CH<sub>2</sub>, **B**), 2.20-2.09 (1H, m, CH<sub>2</sub>, **A**), 1.98-1.82 (1H, m, CH<sub>2</sub>, **A**, 2H, m, CH<sub>2</sub>, **B**), 1.23 (3H, t,  $J = 7.3$  Hz, CH<sub>3</sub>, **B**), 1.14 (3H, t,  $J = 7.3$  Hz, CH<sub>3</sub>, **A**). **Isomer A**: <sup>13</sup>C NMR (125 MHz, DMSO)  $\delta$  163.8, 159.7, 158.4, 157.9, 150.9, 138.5, 133.3, 128.0, 126.3, 125.3, 125.3, 122.7, 113.6, 112.5, 110.8, 108.4, 42.5, 26.2, 24.1, 23.5, 12.2. **Isomer B**: <sup>13</sup>C NMR (125 MHz, DMSO)  $\delta$  163.5, 160.1, 158.6, 156.9, 150.8, 137.7, 129.8, 129.3, 126.3, 125.5, 124.6, 124.1, 113.4, 112.8, 111.4, 109.0, 46.5, 26.6, 24.3, 23.4, 12.5. HRMS ( $m/z$ ): [M+H]<sup>+</sup> calcd. for C<sub>21</sub>H<sub>20</sub>NO<sub>4</sub>, 350.1387; found, 350.1396; Elem. Anal. Calcd for C<sub>21</sub>H<sub>19</sub>NO<sub>4</sub>: C, 72.19; H, 5.48; N, 4.01. Found: C, 72.32; H, 5.39; N, 3.91.

#### 7-Hydroxy-4-propyl-8-(1,2,3,4-tetrahydroquinolin-1-carbonyl)-2H-chromen-2-one (**2c**):

The product was prepared according to General Method 3 using substrate **10c**. The reaction mixture was stirred at RT for 72 h. Yield: 64% as a white solid; mp 184-185 °C as a dynamic equilibrium of *cis-trans* amide bond rotamers distinguishable by NMR in a ratio 2:1. <sup>1</sup>H NMR (500 MHz, DMSO)  $\delta$  10.60 (1H, bs, OH, **A**, 1H, bs, OH, **B**), 8.11 (1H, d,  $J = 8.6$  Hz, CH, **B**), 7.71 (1H, d,  $J = 8.6$  Hz, CH, **B**), 7.55 (1H, d,  $J = 8.8$  Hz, CH, **A**), 7.23-7.18 (2H, m, CH, **B**), 7.13-7.06 (1H, m, CH, **A**, 1H, m, CH, **B**), 6.94 (1H, d,  $J = 8.8$  Hz, CH, **B**), 6.90 (1H, t,  $J = 7.6$  Hz, CH, **A**), 6.75 (1H, d,  $J = 8.8$  Hz, CH, **A**), 6.72 (1H, t,  $J = 7.6$  Hz, CH, **A**), 6.65 (1H, d,  $J = 7.6$  Hz, CH, **A**), 6.14 (1H, s, CH, **B**), 5.97 (1H, s, CH, **A**), 4.13-4.06 (1H, m, CH<sub>2</sub>, **A**), 3.68-3.61 (1H, m, CH<sub>2</sub>, **A**), 3.46 (2H, t,  $J = 5.6$  Hz, CH<sub>2</sub>, **B**), 2.91-2.52 (4H, m, CH<sub>2</sub>, **A**, 4H, m, CH<sub>2</sub>, **B**), 2.20-2.09 (1H, m, CH<sub>2</sub>, **A**), 1.97-1.83 (1H, m, CH<sub>2</sub>, **A**, 2H, m, CH<sub>2</sub>, **B**), 1.71-1.46 (2H, m, CH<sub>2</sub>, **A**, 2H, m, CH<sub>2</sub>, **B**), 0.98 (3H, t,  $J = 7.3$  Hz, CH<sub>3</sub>, **B**), 0.89 (3H, t,  $J = 7.3$  Hz, CH<sub>3</sub>, **A**). **Isomer A**: <sup>13</sup>C NMR (125 MHz, DMSO)  $\delta$  163.9, 159.6, 158.1, 157.0, 151.1, 138.5, 133.3, 128.0, 126.4, 125.3, 125.3, 122.7, 113.6, 112.5, 110.7, 109.3, 42.4, 32.9, 26.2, 23.5, 21.4, 13.7. **Isomer B**: <sup>13</sup>C NMR (125 MHz, DMSO)  $\delta$  163.6, 160.0, 158.1, 157.2, 151.0, 137.7, 129.8, 129.3, 126.4, 125.5, 124.5, 124.1, 113.4, 112.9, 111.3, 109.7, 46.5, 33.1, 26.6, 23.4, 21.5, 13.9. HRMS ( $m/z$ ): [M+H]<sup>+</sup> calcd. for C<sub>22</sub>H<sub>22</sub>NO<sub>4</sub>, 364.1543; found, 364.1549; Elem. Anal. Calcd for C<sub>22</sub>H<sub>21</sub>NO<sub>4</sub>: C, 72.71; H, 5.82; N, 3.85. Found: C, 72.33; H, 5.87; N 3.77.

4-Butyl-7-hydroxy-8-(1,2,3,4-tetrahydroquinolin-1-carbonyl)-2H-chromen-2-one (**2d**): The product was prepared according to General Method 3 using substrate **10d**. The reaction mixture was stirred at RT for 48 h. Yield: 46% as a beige solid; mp 133-135 °C as a dynamic equilibrium of *cis-trans* amide bond rotamers distinguishable by NMR in a ratio 2:1. <sup>1</sup>H NMR (500 MHz, DMSO)  $\delta$  10.98 (1H, bs, OH, **A**, 1H, bs, OH, **B**), 8.11 (1H, d,  $J = 8.3$  Hz, CH, **B**), 7.72 (1H, d,  $J = 8.3$  Hz, CH, **B**), 7.56 (1H, d,  $J = 8.7$  Hz, CH, **A**), 7.23-7.18 (2H, m, CH, **B**), 7.13-7.05 (1H, m, CH, **A**, 1H, m, CH, **B**), 6.95 (1H, d,  $J = 8.7$  Hz, CH, **B**), 6.90 (1H, t,  $J = 7.7$  Hz, CH, **A**), 6.76 (1H, d,  $J = 8.7$  Hz, CH, **A**), 6.72 (1H, t,  $J = 7.7$  Hz, CH, **A**), 6.64 (1H, d,  $J = 7.7$  Hz, CH, **A**), 6.14 (1H, s, CH, **B**), 5.97 (1H, s, CH, **A**), 4.14-4.04 (1H, m, CH<sub>2</sub>, **A**), 3.69-3.59 (1H, m, CH<sub>2</sub>, **A**), 3.48-3.44 (2H, m, CH<sub>2</sub>, **B**), 2.90-2.55 (4H, m, CH<sub>2</sub>, **A**, 4H, m, CH<sub>2</sub>, **B**), 2.20-2.09 (1H, m, CH<sub>2</sub>, **A**), 1.98-1.83 (1H, m, CH<sub>2</sub>, **A**, 2H, m, CH<sub>2</sub>, **B**), 1.65-1.55 (2H, m, CH<sub>2</sub>, **B**), 1.55-1.45 (2H, m, CH<sub>2</sub>, **A**), 1.45-1.37

(2H, m, CH<sub>2</sub>, **B**), 1.36-1.25 (2H, m, CH<sub>2</sub>, **A**) 0.93 (3H, t,  $J = 7.5$  Hz, CH<sub>3</sub>, **B**), 0.87 (3H, t,  $J = 7.3$  Hz, CH<sub>3</sub>, **A**). **Isomer A**: <sup>13</sup>C NMR (125 MHz, DMSO)  $\delta$  163.9, 159.6, 158.0, 157.3, 151.1, 138.5, 133.3, 128.0, 126.5, 125.3, 125.3, 122.8, 113.7, 112.5, 110.7, 109.3, 42.5, 30.8, 30.2, 26.2, 23.6, 20.0, 13.9. **Isomer B**: <sup>13</sup>C NMR (125 MHz, DMSO)  $\delta$  163.6, 160.0, 157.5, 157.1, 151.0, 137.7, 129.8, 129.3, 126.5, 125.5, 124.6, 124.1, 113.5, 112.9, 111.4, 109.7, 46.5, 31.0, 30.4, 26.6, 23.4, 22.2, 13.9. HRMS ( $m/z$ ):  $[M+H]^+$  calcd. for C<sub>23</sub>H<sub>24</sub>NO<sub>4</sub>, 378.1700; found, 378.1711; Elem. Anal. Calcd for C<sub>23</sub>H<sub>23</sub>NO<sub>4</sub>: C, 73.19; H, 6.14; N, 3.71. Found: C, 72.81; H 6.05; N 3.62.

**Scheme 3.** Synthesis of compounds **3a-d**, **4a-d**, and **5a-d**.

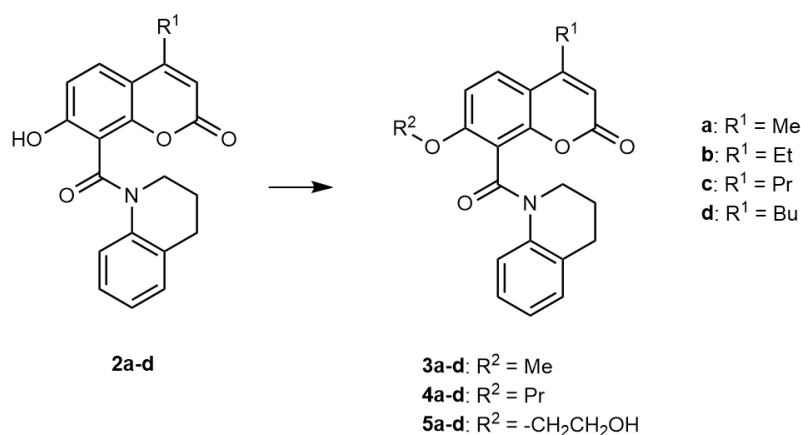

**General Method 4. Synthesis of compounds 3a-d.** The mixture of corresponding 4-alkyl-7-hydroxy-8-(1,2,3,4-tetrahydroquinolin-1-carbonyl)-2H-chromen-2-one **2a-d** (0.9 mmol), dimethyl sulfate (0.23 g, 0.17 mL, 1.8 mmol) and potassium carbonate (0.25 g, 1.8 mmol) in DMF (10 mL) was heated to 100 °C for 3-6 h. Then, volatiles were evaporated under reduced pressure. The residue was dissolved in EtOAc (50 mL) and washed with water (2 × 40 mL) and brine (2 × 30 mL). The organic phase was dried over anhydrous sodium sulfate and concentrated under reduced pressure. Product was suspended with EtOAc (5 mL), filtered off and obtained in high quality without additional purification.

**7-Methoxy-4-methyl-8-(1,2,3,4-tetrahydroquinolin-1-carbonyl)-2H-chromen-2-one (3a):** The product was prepared according to General Method 4. Compound **2a** was used as starting material. The reaction mixture was heated to reflux for 3 h. Yield: 97% as a beige solid; mp 170-171 °C as a dynamic equilibrium of *cis-trans* amide bond rotamers distinguishable by NMR in a ratio 2.5:1. <sup>1</sup>H NMR (500 MHz, DMSO)  $\delta$  8.12-8.08 (1H, m, CH, **B**), 7.84 (1H, d,  $J=8.8$  Hz, CH, **B**), 7.67 (1H, d,  $J = 8.8$  Hz, CH, **A**), 7.23-7.18 (3H, m, CH, **B**), 7.14-7.07 (1H, m, CH, **A**, 1H, m, CH, **B**), 7.00 (1H, d,  $J = 8.8$  Hz, CH, **A**), 6.91 (1H, dt,  $J = 7.5$  Hz,  $J = 1.0$  Hz, CH, **A**), 6.70 (1H, t,  $J = 7.5$  Hz, CH, **A**), 6.53 (1H, d,  $J = 7.5$  Hz, CH, **A**), 6.28 (1H, s, CH, **B**), 6.13 (1H, s, CH, **A**), 4.05-3.96 (1H, m, CH<sub>2</sub>, **A**), 3.93 (3H, s, CH<sub>3</sub>, **B**), 3.77 (3H, s, CH<sub>3</sub>, **A**), 3.78-3.70 (1H, m, CH<sub>2</sub>, **A**), 3.45-3.38 (2H, m, CH<sub>2</sub>, **B**), 2.91-2.78 (1H, m, CH<sub>2</sub>, **A**, 2H, m, CH<sub>2</sub>, **B**), 2.78-2.69 (1H, m, CH<sub>2</sub>, **A**), 2.44 (3H, s, CH<sub>3</sub>, **B**), 2.33 (3H, s, CH<sub>3</sub>, **A**), 2.16-2.06 (1H, m, CH<sub>2</sub>, **A**), 2.00-1.82 (1H, m, CH<sub>2</sub>, **A**, 2H, m, CH<sub>2</sub>, **B**). **Isomer A**: <sup>13</sup>C NMR (125 MHz, DMSO)  $\delta$  163.3, 159.3, 158.6, 153.5, 150.1, 138.3, 133.4,

128.0, 127.3, 125.5, 125.4, 122.8, 114.6, 113.2, 111.5, 108.2, 56.5, 42.5, 26.1, 23.5, 18.3. **Isomer B:**  $^{13}\text{C}$  NMR (125 MHz, DMSO)  $\delta$  163.0, 159.6, 157.9, 153.7, 149.9, 137.5, 129.9, 129.4, 127.2, 125.6, 124.7, 124.1, 114.4, 113.9, 111.9, 108.5, 56.8, 46.5, 26.5, 23.3, 18.4. HRMS ( $m/z$ ):  $[\text{M}+\text{H}]^+$  calcd. for  $\text{C}_{21}\text{H}_{20}\text{NO}_4$ , 350.1387; found, 350.1394; Elem. Anal. Calcd for  $\text{C}_{21}\text{H}_{19}\text{NO}_4$ : C, 72.19; H, 5.48; N, 4.01. Found: C, 72.58; H, 5.49; N, 3.89.

**4-Ethyl-7-methoxy-8-(1,2,3,4-tetrahydroquinolin-1-carbonyl)-2H-chromen-2-one (3b):** The product was prepared according to General Method 4. Compound **2b** was used as starting material. The reaction mixture was heated to reflux for 3 h. Yield: 86 % as a white solid; mp 218-220 °C as a dynamic equilibrium of *cis-trans* amide bond rotamers distinguishable by NMR in a ratio 2.4:1.  $^1\text{H}$  NMR (500 MHz, DMSO)  $\delta$  8.10 (1H, d,  $J$  = 8.6 Hz, CH, **B**), 7.89 (1H, d,  $J$  = 8.6 Hz, CH, **B**), 7.72 (1H, d,  $J$  = 8.8 Hz, CH, **A**), 7.24-7.18 (3H, m, CH, **B**), 7.14-7.06 (1H, m, CH, **A**, 1H, m, CH, **B**), 6.99 (1H, d,  $J$  = 8.8 Hz, CH, **A**), 6.91 (1H, t,  $J$  = 7.4 Hz, CH, **A**), 6.70 (1H, t,  $J$  = 7.4 Hz, CH, **A**), 6.53 (1H, d,  $J$  = 7.4 Hz, CH, **A**), 6.22 (1H, s, CH, **B**), 6.07 (1H, s, CH, **A**), 4.06-3.96 (1H, m,  $\text{CH}_2$ , **A**), 3.93 (3H, s,  $\text{CH}_3$ , **B**), 3.77 (3H, s,  $\text{CH}_3$ , **A**), 3.80-3.69 (1H, m,  $\text{CH}_2$ , **A**), 3.46-3.37 (2H, m,  $\text{CH}_2$ , **B**), 2.92-2.66 (4H, m,  $\text{CH}_2$ , **A**, 4H, m,  $\text{CH}_2$ , **B**), 2.16-2.06 (1H, m,  $\text{CH}_2$ , **A**), 2.01-1.83 (1H, m,  $\text{CH}_2$ , **A**, 2H, m,  $\text{CH}_2$ , **B**), 1.24 (3H, t,  $J$  = 7.4 Hz,  $\text{CH}_3$ , **B**), 1.15 (3H, t,  $J$  = 7.2 Hz,  $\text{CH}_3$ , **A**). **Isomer A:**  $^{13}\text{C}$  NMR (125 MHz, DMSO)  $\delta$  163.3, 159.6, 158.5, 158.2, 150.3, 138.3, 133.4, 128.0, 126.8, 125.5, 125.4, 122.8, 114.8, 112.4, 109.6, 108.2, 56.5, 42.5, 26.1, 24.1, 23.5, 12.2. **Isomer B:**  $^{13}\text{C}$  NMR (125 MHz, DMSO)  $\delta$  163.0, 159.9, 158.4, 157.7, 150.0, 137.5, 129.9, 129.4, 126.8, 125.6, 124.7, 124.1, 114.5, 113.0, 110.1, 108.6, 56.8, 46.6, 26.5, 24.3, 23.3, 12.5. HRMS ( $m/z$ ):  $[\text{M}+\text{H}]^+$  calcd. for  $\text{C}_{22}\text{H}_{22}\text{NO}_4$ , 364.1543; found, 364.1549; Elem. Anal. Calcd for  $\text{C}_{22}\text{H}_{21}\text{NO}_4$ : C, 72.71; H, 5.82; N, 3.85. Found: C, 72.32; H, 5.89; N, 3.69.

**7-Methoxy-4-propyl-8-(1,2,3,4-tetrahydroquinolin-1-carbonyl)-2H-chromen-2-one (3c):** The product was prepared according to General Method 4. Compound **2c** was used as starting material. The reaction mixture was heated to reflux for 6 h. Yield: 80% as a white solid; mp 200-202 °C as a dynamic equilibrium of *cis-trans* amide bond rotamers distinguishable by NMR in a ratio 2.4:1.  $^1\text{H}$  NMR (500 MHz, DMSO)  $\delta$  8.10 (1H, d,  $J$  = 8.2 Hz, CH, **B**), 7.90 (1H, d,  $J$  = 8.2 Hz, CH, **B**), 7.73 (1H, d,  $J$  = 8.9 Hz, CH, **A**), 7.23-7.18 (3H, m, CH, **B**), 7.14-7.07 (1H, m, CH, **A**, 1H, m, CH, **B**), 6.99 (1H, d,  $J$  = 8.9 Hz, CH, **A**), 6.90 (1H, dt,  $J$  = 7.3 Hz,  $J$  = 1.4 Hz, CH, **A**), 6.69 (1H, t,  $J$  = 7.3 Hz, CH, **A**), 6.52 (1H, d,  $J$  = 7.3 Hz, CH, **A**), 6.23 (1H, s, CH, **B**), 6.07 (1H, s, CH, **A**), 4.06-3.97 (1H, m,  $\text{CH}_2$ , **A**), 3.93 (3H, s,  $\text{CH}_3$ , **B**), 3.77 (3H, s,  $\text{CH}_3$ , **A**), 3.78-3.70 (1H, m,  $\text{CH}_2$ , **A**), 3.46-3.39 (2H, m,  $\text{CH}_2$ , **B**), 2.91-2.59 (4H, m,  $\text{CH}_2$ , **A**, 4H, m,  $\text{CH}_2$ , **B**), 2.16-2.06 (1H, m,  $\text{CH}_2$ , **A**), 2.00-1.84 (1H, m,  $\text{CH}_2$ , **A**, 2H, m,  $\text{CH}_2$ , **B**), 1.75-1.49 (2H, m,  $\text{CH}_2$ , **A**, 2H, m,  $\text{CH}_2$ , **B**), 0.99 (3H, t,  $J$  = 7.3 Hz,  $\text{CH}_3$ , **B**), 0.91 (3H, t,  $J$  = 7.5 Hz,  $\text{CH}_3$ , **A**). **Isomer A:**  $^{13}\text{C}$  NMR (125 MHz, DMSO)  $\delta$  163.3, 159.4, 158.5, 156.8, 150.4, 138.3, 133.4, 128.0, 127.0, 125.5, 125.3, 122.8, 114.8, 112.4, 110.6, 108.2, 56.5, 42.5, 32.8, 26.1, 24.5, 21.3, 13.7. **Isomer B:**  $^{13}\text{C}$  NMR (125 MHz, DMSO)  $\delta$  163.0, 159.7, 157.7, 156.9, 150.1, 137.5, 129.9, 129.4, 127.0, 125.6, 124.7, 124.1, 114.6, 113.1, 111.0, 108.6, 56.8, 46.5, 33.0, 26.5, 24.3, 21.5, 13.9. HRMS ( $m/z$ ):  $[\text{M}+\text{H}]^+$  calcd. for  $\text{C}_{23}\text{H}_{24}\text{NO}_4$ , 378.1700; found, 378.1711; Elem. Anal. Calcd for  $\text{C}_{23}\text{H}_{23}\text{NO}_4$ : C, 73.19; H, 6.14; N, 3.71. Found: C, 72.8; H, 6.10; N, 3.58.

**4-Butyl-7-methoxy-8-(1,2,3,4-tetrahydroquinolin-1-carbonyl)-2H-chromen-2-one (3d):** The product was prepared according to General Method 4. Compound **2d** was used as starting material. The reaction mixture

was refluxed for 6 h. Yield: 63 % as a beige solid; mp 161-163 °C as a dynamic equilibrium of *cis-trans* amide bond rotamers distinguishable by NMR in a ratio 2.9:1. <sup>1</sup>H NMR (600 MHz, DMSO) δ 8.07 (1H, d, *J* = 8.1 Hz, CH, **B**), 7.85 (1H, d, *J* = 8.1 Hz, CH, **B**), 7.69 (1H, d, *J* = 9.0 Hz, CH, **A**), 7.20-7.14 (3H, m, CH, **B**), 7.11-7.02 (1H, m, CH, **A**, 1H, m, CH, **B**), 6.95 (1H, d, *J* = 9.0 Hz, CH, **A**), 6.87 (1H, t, *J* = 7.4 Hz, CH, **A**), 6.66 (1H, t, *J* = 7.4 Hz, CH, **A**), 6.48 (1H, d, *J* = 7.4 Hz, CH, **A**), 6.19 (1H, s, CH, **B**), 6.04 (1H, s, CH, **A**), 4.03-3.94 (1H, m, CH<sub>2</sub>, **A**), 3.90 (3H, s, CH<sub>3</sub>, **B**), 3.74 (3H, s, CH<sub>3</sub>, **A**), 3.73-3.67 (1H, m, CH<sub>2</sub>, **A**), 3.42-3.36 (2H, m, CH<sub>2</sub>, **B**), 2.88-2.57 (4H, m, CH<sub>2</sub>, **A**, 4H, m, CH<sub>2</sub>, **B**), 2.12-2.03 (1H, m, CH<sub>2</sub>, **A**), 1.94-1.87 (1H, m, CH<sub>2</sub>, **A**), 1.87-1.80 (2H, m, CH<sub>2</sub>, **B**), 1.63-1.53 (2H, m, CH<sub>2</sub>, **B**), 1.53-1.42 (2H, m, CH<sub>2</sub>, **A**), 1.41-1.35 (2H, m, CH<sub>2</sub>, **B**), 1.33-1.25 (2H, m, CH<sub>2</sub>, **A**), 0.90 (3H, t, *J* = 7.2 Hz, CH<sub>3</sub>, **B**), 0.85 (3H, t, *J* = 7.5 Hz, CH<sub>3</sub>, **A**). **Isomer A**: <sup>13</sup>C NMR (150 MHz, DMSO) δ 163.3, 159.4, 158.5, 157.0, 150.4, 138.3, 133.4, 128.0, 127.0, 125.4, 125.3, 122.8, 114.8, 112.4, 110.5, 108.2, 56.5, 42.5, 30.7, 30.1, 26.1, 23.5, 21.9, 13.8. **Isomer B**: <sup>13</sup>C NMR (150 MHz, DMSO) δ 163.0, 159.7, 157.7, 157.2, 150.1, 137.5, 129.8, 129.3, 126.9, 125.6, 124.7, 124.1, 114.6, 113.0, 110.9, 108.6, 56.7, 46.5, 30.9, 30.3, 26.5, 23.3, 22.1, 13.9. HRMS (*m/z*): [M+H]<sup>+</sup> calcd. for C<sub>24</sub>H<sub>26</sub>NO<sub>4</sub>, 392.1856; found, 392.1865; Elem. Anal. Calcd for C<sub>24</sub>H<sub>25</sub>NO<sub>4</sub>: C, 73.64; H, 6.44; N, 3.58. Found: C, 73.25; H, 6.61; N, 3.42.

**General Method 5. Synthesis of compounds 4a-d.** 1-Bromopropane (0.2 g, 0.15 mL, 1.63 mmol) was added to a solution of corresponding 4-alkyl-7-hydroxy-8-(1,2,3,4-tetrahydroquinoline-1-carbonyl)-2*H*-chromen-2-one **2a-d** (0.54 mmol) and potassium carbonate (0.23 g, 1.63 mmol) in DMF (7 mL). The reaction mixture was heated to 75 °C for 12 h. After cooling, the reaction mixture was diluted with EtOAc (50 mL), washed with water (3 × 30 mL) and brine (1 × 30 mL), organic phase was dried over anhydrous sodium sulfate, and concentrated under reduced pressure. The product was suspended in diethyl ether (10-15 mL), filtered off and obtained in high quality without additional purification.

**4-Methyl-7-propoxy-8-(1,2,3,4-tetrahydroquinolin-1-carbonyl)-2*H*-chromen-2-one (4a):** The product was prepared according to General Method 5. Compound **2a** was used as starting material. Yield: 69% as a white solid; mp 158-159 °C as a dynamic equilibrium of *cis-trans* amide bond rotamers distinguishable by NMR in a ratio 2.2:1. <sup>1</sup>H NMR (500 MHz, DMSO) δ 8.06 (1H, d, *J* = 8.9 Hz, CH, **B**), 7.80 (1H, d, *J* = 8.9 Hz, CH, **B**), 7.65 (1H, d, *J* = 8.8 Hz, CH, **A**), 7.25-7.16 (3H, m, CH, **B**), 7.14-7.06 (1H, m, CH, **A**, 1H, m, CH, **B**), 6.98 (1H, d, *J* = 8.8 Hz, CH, **A**), 6.91 (1H, t, *J* = 7.6 Hz CH, **A**), 6.70 (1H, t, *J* = 7.6 Hz, CH, **A**), 6.56 (1H, d, *J* = 7.6 Hz, CH, **A**), 6.27 (1H, s, CH, **B**), 6.14 (1H, s, CH, **A**), 4.16-4.10 (2H, m, CH<sub>2</sub>, **B**), 4.04-3.97 (1H, m, CH<sub>2</sub>, **A**), 3.97-3.82 (3H, m, CH<sub>2</sub>, **A**), 3.51-3.42 (1H, m, CH<sub>2</sub>, **B**), 3.41-3.34 (1H, m, CH<sub>2</sub>, **B**), 2.92-2.83 (1H, m, CH<sub>2</sub>, **A**), 2.83-2.69 (1H, m, CH<sub>2</sub>, **A**, 2H, m, CH<sub>2</sub>, **B**), 2.43 (3H, s CH<sub>3</sub>, **B**), 2.33 (3H, s CH<sub>3</sub>, **A**), 2.15-2.06 (1H, m CH<sub>2</sub>, **A**), 2.00-1.82 (1H, m CH<sub>2</sub>, **A**, 2H, m CH<sub>2</sub>, **B**), 1.75-1.59 (2H, m CH<sub>2</sub>, **A**, 2H, m CH<sub>2</sub>, **B**), 0.92 (3H, t, *J* = 7.3 Hz, CH<sub>3</sub>, **A**, 3H, t, *J* = 7.3 Hz, CH<sub>3</sub>, **B**). **Isomer A**: <sup>13</sup>C NMR (125 MHz, DMSO) δ 163.3, 159.4, 157.9, 153.5, 150.4, 138.2, 132.9, 128.2, 127.1, 125.4, 125.4, 122.6, 114.8, 113.0, 111.5, 108.8, 70.3, 42.6, 26.3, 23.4, 22.0, 18.3, 10.3. **Isomer B**: <sup>13</sup>C NMR (125 MHz, DMSO) δ 162.1, 159.6, 157.3, 153.6, 150.0, 137.5, 129.9, 129.3, 127.1, 125.6, 124.7, 124.0, 114.5, 113.7, 111.8, 109.3, 70.4, 46.4, 26.5, 23.5, 22.1, 18.4, 10.4. HRMS (*m/z*): [M+H]<sup>+</sup> calcd. for C<sub>23</sub>H<sub>24</sub>NO<sub>4</sub>, 378.1700; found, 378.1702; Elem. Anal. Calcd for C<sub>23</sub>H<sub>23</sub>NO<sub>4</sub>: C, 73.19; H, 6.14; N, 3.71. Found: C, 72.97; H 5.94, N 3.65.

**4-Ethyl-7-propoxy-8-(1,2,3,4-tetrahydroquinolin-1-carbonyl)-2H-chromen-2-one (4b):** The product was prepared according to General Method 5. Compound **2b** was used as starting material. Yield: 75% as a white solid; mp 139-140 °C as a dynamic equilibrium of *cis-trans* amide bond rotamers distinguishable by NMR in a ratio 2:1. <sup>1</sup>H NMR (600 MHz, DMSO) δ 8.01 (1H, d, *J* = 8.5 Hz, CH, **B**), 7.80 (1H, d, *J* = 8.5 Hz, CH, **B**), 7.65 (1H, d, *J* = 9.0 Hz, CH, **A**), 7.20-7.12 (3H, m, CH, **B**), 7.09-7.02 (1H, m, CH, **A**, 1H, m, CH, **B**), 6.93 (1H, d, *J* = 9.0 Hz, CH, **A**), 6.85 (1H, t, *J* = 7.6 Hz, CH, **A**), 6.65 (1H, t, *J* = 7.6 Hz, CH, **A**), 6.51 (1H, d, *J* = 7.6 Hz, CH, **A**), 6.16 (1H, s, CH, **B**), 6.03 (1H, s, CH, **A**), 4.13-4.04 (2H, m, CH<sub>2</sub>, **B**), 4.00-3.77 (4H, m, CH<sub>2</sub>, **A**), 3.45-3.38 (1H, m, CH<sub>2</sub>, **B**), 3.36-3.30 (1H, m, CH<sub>2</sub>, **B**), 2.86-2.62 (4H, m, CH<sub>2</sub>, **A**, 4H, m, CH<sub>2</sub>, **B**), 2.10-2.00 (1H, m, CH<sub>2</sub>, **A**), 1.94-1.84 (1H, m, CH<sub>2</sub>, **A**), 1.84-1.77 (2H, m, CH<sub>2</sub>, **B**), 1.70-1.55 (2H, m, CH<sub>2</sub>, **A**, 2H, m, CH<sub>2</sub>, **B**), 1.19 (3H, t, *J* = 7.5 Hz, CH<sub>3</sub>, **B**), 1.11 (3H, t, *J* = 7.7 Hz, CH<sub>3</sub>, **A**), 0.87 (3H, t, *J* = 7.4 Hz, CH<sub>3</sub>, **A**), 0.84 (3H, t, *J* = 7.2 Hz, CH<sub>3</sub>, **B**). **Isomer A:** <sup>13</sup>C NMR (150 MHz, DMSO) δ 163.6, 160.0, 158.5, 158.1, 150.9, 138.6, 133.2, 128.6, 127.0, 125.7, 125.7, 122.9, 115.3, 112.6, 109.9, 109.2, 70.7, 42.9, 26.7, 24.5, 23.7, 22.3, 12.6, 10.7. **Isomer B:** <sup>13</sup>C NMR (150 MHz, DMSO) δ 163.4, 160.2, 158.7, 157.5, 150.5, 137.9, 130.3, 129.7, 127.0, 126.0, 125.0, 124.3, 115.1, 113.2, 110.3, 109.7, 70.7, 46.8, 26.8, 24.6, 23.8, 22.5, 12.8, 10.7. HRMS (*m/z*): [M+H]<sup>+</sup> calcd. for C<sub>24</sub>H<sub>26</sub>NO<sub>4</sub>, 392.1856; found, 392.1856; Elem. Anal. Calcd for C<sub>24</sub>H<sub>25</sub>NO<sub>4</sub>: C, 73.64; H, 6.44; N, 3.58. Found: C, 73.27; H, 6.54; N 3.55.

**7-Propoxy-4-propyl-8-(1,2,3,4-tetrahydroquinolin-1-carbonyl)-2H-chromen-2-one (4c):** The product was prepared according to General Method 5. Compound **2c** was used as starting material. Yield: 73% as a white solid; mp 122-123 °C as a dynamic equilibrium of *cis-trans* amide bond rotamers distinguishable by NMR in a ratio 2:1. <sup>1</sup>H NMR (500 MHz, DMSO) δ 8.06 (1H, d, *J* = 8.5 Hz, CH, **B**), 7.86 (1H, d, *J* = 8.5 Hz, CH, **B**), 7.71 (1H, d, *J* = 8.9 Hz, CH, **A**), 7.24-7.15 (3H, m, CH, **B**), 7.14-7.01 (1H, m, CH, **A**, 1H, m, CH, **B**), 6.97 (1H, d, *J* = 8.9 Hz, CH, **A**), 6.90 (1H, t, *J* = 7.5 Hz, CH, **A**), 6.69 (1H, t, *J* = 7.5 Hz, CH, **A**), 6.55 (1H, d, *J* = 7.5 Hz, CH, **A**), 6.21 (1H, s, CH, **B**), 6.08 (1H, s, CH, **A**), 4.13 (2H, t, *J* = 5.8 Hz, CH<sub>2</sub>, **B**), 4.04-3.81 (4H, m, CH<sub>2</sub>, **A**), 3.52-3.43 (1H, m, CH<sub>2</sub>, **B**), 3.42-3.35 (1H, m, CH<sub>2</sub>, **B**), 2.93-2.59 (4H, m, CH<sub>2</sub>, **A**, 4H, m, CH<sub>2</sub>, **B**), 2.15-2.06 (1H, m, CH<sub>2</sub>, **A**), 2.00-1.91 (1H, m, CH<sub>2</sub>, **A**), 1.91-1.84 (2H, m, CH<sub>2</sub>, **B**), 1.75-1.47 (4H, m, CH<sub>2</sub>, **A**, 4H, m, CH<sub>2</sub>, **B**), 0.99 (3H, t, *J* = 7.5 Hz, CH<sub>3</sub>, **B**), 0.92 (3H, t, *J* = 7.5 Hz, CH<sub>3</sub>, **A**), 0.91 (3H, t, *J* = 7.2 Hz, CH<sub>3</sub>, **A**), 0.91 (3H, t, *J* = 7.2 Hz, CH<sub>3</sub>, **B**). **Isomer A:** <sup>13</sup>C NMR (125 MHz, DMSO) δ 163.3, 159.5, 157.8, 156.8, 150.6, 138.2, 132.9, 128.2, 126.9, 125.4, 125.3, 122.6, 115.0, 112.3, 110.5, 108.8, 70.3, 42.6, 32.8, 26.3, 23.3, 22.0, 21.3, 13.7, 10.3. **Isomer B:** <sup>13</sup>C NMR (125 MHz, DMSO) δ 163.1, 159.7, 157.2, 156.9, 150.2, 137.5, 129.9, 129.3, 126.9, 125.6, 124.7, 124.0, 114.8, 112.9, 110.9, 109.3, 70.4, 46.4, 33.0, 26.5, 23.5, 22.1, 21.5, 13.9, 10.3. HRMS (*m/z*): [M+H]<sup>+</sup> calcd. for C<sub>25</sub>H<sub>28</sub>NO<sub>4</sub>, 406.2013; found, 406.2015; Elem. Anal. Calcd for C<sub>25</sub>H<sub>27</sub>NO<sub>4</sub>: C, 74.05; H, 6.71; N, 3.45. Found: C, 74.24; H, 6.93; N 3.70.

**4-Butyl-7-propoxy-8-(1,2,3,4-tetrahydroquinolin-1-carbonyl)-2H-chromen-2-one (4d):** The product was prepared according to General Method 5. Compound **2d** was used as starting material. Yield: 59% as a white solid; mp 116-117 °C as a dynamic equilibrium of *cis-trans* amide bond rotamers distinguishable by NMR in a ratio 2.5:1. <sup>1</sup>H NMR (600 MHz, DMSO) δ 8.03 (1H, d, *J* = 9.0 Hz, CH, **B**), 7.82 (1H, d, *J* = 9.0 Hz, CH, **B**), 7.67 (1H, d, *J* = 8.7 Hz, CH, **A**), 7.21-7.12 (3H, m, CH, **B**), 7.11-7.03 (1H, m, CH, **A**, 1H, m, CH, **B**), 6.94 (1H, d, *J* = 8.7 Hz, CH, **A**), 6.87 (1H, t, *J* = 7.4 Hz, CH, **A**), 6.66 (1H, t, *J* = 7.4 Hz, CH, **A**), 6.51 (1H, d, *J* = 7.4 Hz, CH, **A**), 6.18 (1H, s, CH, **B**), 6.05 (1H, s, CH, **A**), 4.12-4.07 (2H, m, CH<sub>2</sub>, **B**), 4.00-3.94 (1H, m, CH<sub>2</sub>, **A**), 3.94-3.78 (3H, m, CH<sub>2</sub>, **A**), 3.46-3.40 (1H, m, CH<sub>2</sub>, **B**), 3.38-3.31 (1H, m, CH<sub>2</sub>, **B**),

2.88-2.60 (4H, m, CH<sub>2</sub>, **A**, 4H, m, CH<sub>2</sub>, **B**), 2.11-2.03 (1H, m, CH<sub>2</sub>, **A**), 1.97-1.87 (1H, m, CH<sub>2</sub>, **A**), 1.87-1.81 (2H, m, CH<sub>2</sub>, **B**), 1.70-1.43 (4H, m, CH<sub>2</sub>, **A**, 4H, m, CH<sub>2</sub>, **B**), 1.41-1.35 (2H, m, CH<sub>2</sub>, **B**), 1.35-1.26 (2H, m, CH<sub>2</sub>, **A**), 0.90 (3H, t, *J* = 7.5 Hz, CH<sub>3</sub>, **B**), 0.89 (3H, t, *J* = 7.5 Hz, CH<sub>3</sub>, **A**), 0.89 (3H, t, *J* = 7.5 Hz, CH<sub>3</sub>, **B**), 0.86 (3H, t, *J* = 7.5 Hz, CH<sub>3</sub>, **A**). **Isomer A**: <sup>13</sup>C NMR (150 MHz, DMSO) δ 163.3, 159.5, 157.7, 157.0, 150.6, 138.2, 132.9, 128.2, 126.9, 125.3, 125.3, 122.6, 115.0, 112.2, 110.4, 108.8, 70.3, 42.6, 30.7, 30.2, 26.3, 23.3, 22.0, 22.0, 13.8, 10.3. **Isomer B**: <sup>13</sup>C NMR (150 MHz, DMSO) δ 163.1, 159.7, 157.2, 157.2, 150.2, 137.5, 129.9, 129.3, 126.9, 125.6, 124.7, 124.0, 114.8, 112.9, 110.8, 109.3, 70.3, 46.4, 30.9, 30.4, 26.4, 23.4, 22.1, 22.1, 13.9, 10.3. HRMS (*m/z*): [M+H]<sup>+</sup> calcd. for C<sub>26</sub>H<sub>30</sub>NO<sub>4</sub>, 420.2169; found, 420.2176; Elem. Anal. Calcd for C<sub>26</sub>H<sub>29</sub>NO<sub>4</sub>: C, 74.44; H, 6.97; N, 3.34. Found: C, 74.69; H, 6.97; N 3.27.

**General Method 6. Synthesis of compounds 5a-d.** 2-Bromoethan-1-ol (0.23 g, 0.13 mL, 1.8 mmol) was added to a solution of corresponding 4-alkyl-7-hydroxy-8-(1,2,3,4-tetrahydroquinoline-1-carbonyl)-2*H*-chromen-2-one **2a-d** (0.6 mmol) and potassium carbonate (0.25 g, 1.8 mmol) in DMF (7 mL). The reaction mixture was heated to 100 °C for 12 h. After cooling, the reaction mixture was diluted with EtOAc (50 mL), washed with water (3 × 30 mL) and brine (1 × 30 mL), organic layer was dried over anhydrous sodium sulfate, and concentrated under reduced pressure. The product was purified by column chromatography (mobile phase: hexane/EtOAc, 1:1; then hexane/EtOAc/acetic acid, 5:5:1).

*7-(2-Hydroxyethoxy)-4-methyl-8-(1,2,3,4-tetrahydroquinolin-1-carbonyl)-2H-chromen-2-one (5a)*: The product was prepared according to General Method 6. Compound **2a** was used as starting material. Yield: 29% as a white solid; mp 171-172 °C as a dynamic equilibrium of *cis-trans* amide bond rotamers distinguishable by NMR in a ratio 2.5:1. <sup>1</sup>H NMR (500 MHz, DMSO) δ 8.09 (1H, d, *J* = 8.6 Hz, CH, **B**), 7.80 (1H, d, *J* = 8.6 Hz, CH, **B**), 7.65 (1H, d, *J* = 8.8 Hz, CH, **A**), 7.25-7.18 (3H, m, CH, **B**), 7.13-7.06 (1H, m, CH, **A**, 1H, m, CH, **B**), 7.03 (1H, d, *J* = 8.8 Hz, CH, **A**), 6.90 (1H, t, *J* = 7.5 Hz, CH, **A**), 6.70 (1H, t, *J* = 7.5 Hz, CH, **A**), 6.63 (1H, d, *J* = 7.5 Hz, CH, **A**), 6.27 (1H, s, CH, **B**), 6.14 (1H, s, CH, **A**), 4.23-4.18 (2H, m, CH<sub>2</sub>, **B**), 4.13-4.06 (1H, m, CH<sub>2</sub>, **A**), 4.02-3.92 (1H, m, CH<sub>2</sub>, **A**, 1H, m, CH<sub>2</sub>, **A**), 3.83-3.76 (1H, m, CH<sub>2</sub>, **A**), 3.69 (2H, t, *J* = 4.9 Hz, CH<sub>2</sub>, **B**), 3.64 (2H, t, *J* = 4.9 Hz, CH<sub>2</sub>, **A**), 3.50-3.45 (2H, m, CH<sub>2</sub>, **B**), 2.92-2.71 (2H, m, CH<sub>2</sub>, **A**, 2H, m, CH<sub>2</sub>, **B**), 2.44 (3H, s, CH<sub>3</sub>, **B**), 2.33 (3H, s, CH<sub>3</sub>, **A**), 2.17-2.07 (1H, m, CH<sub>2</sub>, **A**), 2.00-1.89 (1H, m, CH<sub>2</sub>, **A**), 1.89-1.72 (2H, m, CH<sub>2</sub>, **B**). **Isomer A**: <sup>13</sup>C NMR (125 MHz, DMSO) δ 163.3, 159.4, 158.1, 153.5, 150.3, 138.3, 133.0, 128.1, 127.1, 125.4, 125.4, 122.9, 114.9, 113.1, 111.5, 109.1, 70.8, 59.4, 42.6, 26.3, 23.4, 18.3. **Isomer B**: <sup>13</sup>C NMR (125 MHz, DMSO) δ 163.1, 159.6, 157.4, 153.6, 150.0, 137.6, 130.1, 129.3, 127.1, 125.6, 124.7, 124.2, 114.7, 113.8, 111.9, 109.6, 71.0, 59.6, 46.4, 26.5, 23.4, 18.4. HRMS (*m/z*): [M+H]<sup>+</sup> calcd. for C<sub>22</sub>H<sub>22</sub>NO<sub>5</sub>, 380.1492; found, 380.1490; Elem. Anal. Calcd for C<sub>22</sub>H<sub>27</sub>NO<sub>8</sub> (trihydrate): C, 60.96; H, 6.28; N 3.23. Found: C, 60.82; H, 6.03; N 3.21.

*4-Ethyl-7-(2-hydroxyethoxy)-8-(1,2,3,4-tetrahydroquinolin-1-carbonyl)-2H-chromen-2-one (5b)*: The product was prepared according to General Method 6. Compound **2b** was used as starting material. Yield: 60% as a white solid; mp 130-131 °C as a dynamic equilibrium of *cis-trans* amide bond rotamers distinguishable by NMR in a ratio 2.5:1. <sup>1</sup>H NMR (500 MHz, DMSO) δ 8.09 (1H, d, *J* = 8.6 Hz, CH, **B**), 7.85 (1H, d, *J* = 8.6 Hz, CH, **B**), 7.70 (1H, d, *J* = 9.0 Hz, CH, **A**), 7.25-7.18 (3H, m, CH, **B**), 7.14-7.06 (1H, m, CH, **A**, 1H, m, CH, **B**), 7.02 (1H, d, *J* = 9.0 Hz, CH, **A**), 6.90 (1H, dt, *J* = 7.3 Hz, *J* = 1.0 Hz, CH, **A**),

6.69 (1H, t,  $J = 7.3$  Hz, CH, **A**), 6.63 (1H, d,  $J = 7.3$  Hz, CH, **A**), 6.22 (1H, s, CH, **B**), 6.07 (1H, s, CH, **A**), 4.23-4.18 (2H, m, CH<sub>2</sub>, **B**), 4.13-4.06 (1H, m, CH<sub>2</sub>, **A**), 4.02-3.92 (1H, m, CH<sub>2</sub>, **A**, 1H, m, CH<sub>2</sub>, **A**), 3.83-3.76 (1H, m, CH<sub>2</sub>, **A**), 3.70-3.67 (2H, m, CH<sub>2</sub>, **B**), 3.64 (2H, t,  $J = 5.1$  Hz, CH<sub>2</sub>, **A**), 3.51-3.34 (2H, m, CH<sub>2</sub>, **B**), 2.93-2.63 (4H, m, CH<sub>2</sub>, **A**, 4H, m, CH<sub>2</sub>, **B**), 2.18-2.05 (1H, m, CH<sub>2</sub>, **A**), 2.02-1.88 (1H, m, CH<sub>2</sub>, **A**), 1.88-1.79 (2H, m, CH<sub>2</sub>, **B**), 1.24 (3H, t,  $J = 7.3$  Hz, CH<sub>3</sub>, **B**), 1.16 (3H, t,  $J = 7.3$  Hz, CH<sub>3</sub>, **A**). **Isomer A**: <sup>13</sup>C NMR (125 MHz, DMSO)  $\delta$  163.4, 159.7, 158.2, 158.0, 150.4, 138.3, 133.0, 128.2, 126.7, 125.5, 125.4, 122.9, 115.1, 112.3, 109.6, 109.2, 70.8, 59.4, 42.7, 26.3, 24.1, 23.4, 12.2. **Isomer B**: <sup>13</sup>C NMR (125 MHz, DMSO)  $\delta$  163.1, 159.9, 158.4, 157.3, 150.2, 137.6, 130.1, 129.3, 126.7, 125.6, 124.7, 124.2, 114.9, 113.0, 110.0, 109.6, 71.0, 59.6, 46.5, 26.5, 24.3, 23.4, 12.5. HRMS ( $m/z$ ):  $[M+H]^+$  calcd. for C<sub>23</sub>H<sub>24</sub>NO<sub>5</sub>, 394.1649; found, 394.1660; Elem. Anal. Calcd for C<sub>23</sub>H<sub>23</sub>NO<sub>5</sub>: C, 70.21; H, 5.89; N, 3.56. Found: C, 70.0; H, 6.2; N 3.55.

*7-(2-Hydroxyethoxy)-4-propyl-8-(1,2,3,4-tetrahydroquinolin-1-carbonyl)-2H-chromen-2-one (5c)*: The product was prepared according to General Method 6. Compound **2c** was used as starting material. Yield: 82% as a white solid; mp 148-149 °C as a dynamic equilibrium of *cis-trans* amide bond rotamers distinguishable by NMR in a ratio 2.2:1. <sup>1</sup>H NMR (500 MHz, DMSO)  $\delta$  8.10 (1H, d,  $J = 8.8$  Hz, CH, **B**), 7.86 (1H, d,  $J = 8.8$  Hz, CH, **B**), 7.70 (1H, d,  $J = 9.0$  Hz, CH, **A**), 7.24-7.18 (3H, m, CH, **B**), 7.13-7.06 (1H, m, CH, **A**, 1H, m, CH, **B**), 7.01 (1H, d,  $J = 9.0$  Hz, CH, **A**), 6.90 (1H, dt,  $J = 7.6$  Hz,  $J = 1.5$  Hz, CH, **A**), 6.69 (1H, dt,  $J = 7.6$  Hz,  $J = 1.5$  Hz, CH, **A**), 6.62 (1H, d,  $J = 7.6$  Hz, CH, **A**), 6.22 (1H, s, CH, **B**), 6.08 (1H, s, CH, **A**), 4.23-4.18 (2H, m, CH<sub>2</sub>, **B**), 4.13-4.06 (1H, m, CH<sub>2</sub>, **A**), 4.03-3.92 (1H, m, CH<sub>2</sub>, **A**, 1H, m, CH<sub>2</sub>, **A**), 3.82-3.75 (1H, m, CH<sub>2</sub>, **A**), 3.71-3.67 (2H, m, CH<sub>2</sub>, **B**), 3.65 (2H, t,  $J = 5.1$  Hz, CH<sub>2</sub>, **A**), 3.51-3.34 (2H, m, CH<sub>2</sub>, **B**), 2.92-2.59 (4H, m, CH<sub>2</sub>, **A**, 4H, m, CH<sub>2</sub>, **B**), 2.18-2.06 (1H, m, CH<sub>2</sub>, **A**), 2.02-1.89 (1H, m, CH<sub>2</sub>, **A**), 1.89-1.80 (2H, m, CH<sub>2</sub>, **B**), 1.71-1.49 (2H, m, CH<sub>2</sub>, **A**, 2H, m, CH<sub>2</sub>, **B**), 0.99 (3H, t,  $J = 7.3$  Hz, CH<sub>3</sub>, **B**), 0.91 (3H, t,  $J = 7.3$  Hz, CH<sub>3</sub>, **A**). **Isomer A**: <sup>13</sup>C NMR (125 MHz, DMSO)  $\delta$  163.4, 159.5, 158.0, 156.8, 150.5, 138.2, 133.0, 128.1, 126.9, 125.4, 125.3, 122.9, 115.1, 112.4, 110.5, 109.1, 70.8, 59.4, 42.7, 32.8, 26.3, 23.4, 21.3, 13.7. **Isomer B**: <sup>13</sup>C NMR (125 MHz, DMSO)  $\delta$  163.1, 159.8, 157.3, 156.9, 150.3, 137.6, 130.1, 129.3, 126.8, 125.6, 124.7, 124.2, 114.9, 113.0, 111.0, 109.6, 71.0, 59.6, 46.5, 33.0, 26.5, 23.4, 21.5, 13.9. HRMS ( $m/z$ ):  $[M+H]^+$  calcd. for C<sub>24</sub>H<sub>26</sub>NO<sub>5</sub>, 408.1805; found, 408.1812; Elem. Anal. Calcd for C<sub>24</sub>H<sub>27</sub>NO<sub>6</sub> (hydrate): C, 67.75; H, 6.40; N, 3.29. Found: C, 68.13; H, 6.05; N 3.14.

*4-Butyl-7-(2-hydroxyethoxy)-8-(1,2,3,4-tetrahydroquinolin-1-carbonyl)-2H-chromen-2-one (5d)*: The product was prepared according to General Method 6. Compound **2d** was used as starting material. Yield: 78% as a white solid; mp 114-115 °C as a dynamic equilibrium of *cis-trans* amide bond rotamers distinguishable by NMR in a ratio 2.2:1. <sup>1</sup>H NMR (500 MHz, DMSO)  $\delta$  8.09 (1H, d,  $J = 8.3$  Hz, CH, **B**), 7.85 (1H, d,  $J = 8.3$  Hz, CH, **B**), 7.70 (1H, d,  $J = 8.8$  Hz, CH, **A**), 7.24-7.18 (3H, m, CH, **B**), 7.13-7.05 (1H, m, CH, **A**, 1H, m, CH, **B**), 7.02 (1H, d,  $J = 8.8$  Hz, CH, **A**), 6.90 (1H, dt,  $J = 7.6$  Hz,  $J = 1.0$  Hz, CH, **A**), 6.69 (1H, dt,  $J = 7.6$  Hz,  $J = 1.0$  Hz, CH, **A**), 6.61 (1H, d,  $J = 7.6$  Hz, CH, **A**), 6.22 (1H, s, CH, **B**), 6.08 (1H, s, CH, **A**), 4.23-4.19 (2H, m, CH<sub>2</sub>, **B**), 4.13-4.06 (1H, m, CH<sub>2</sub>, **A**), 4.03-3.92 (1H, m, CH<sub>2</sub>, **A**, 1H, m, CH<sub>2</sub>, **A**), 3.83-3.76 (1H, m, CH<sub>2</sub>, **A**), 3.70-3.67 (2H, m, CH<sub>2</sub>, **B**), 3.64 (2H, t,  $J = 5.2$  Hz, CH<sub>2</sub>, **A**), 3.51-3.36 (2H, m, CH<sub>2</sub>, **B**), 2.92-2.61 (4H, m, CH<sub>2</sub>, **A**, 4H, m, CH<sub>2</sub>, **B**), 2.18-2.07 (1H, m, CH<sub>2</sub>, **A**), 2.02-1.80 (1H, m, CH<sub>2</sub>, **A**), 1.80-1.72 (2H, m, CH<sub>2</sub>, **B**), 1.67-1.45 (2H, m, CH<sub>2</sub>, **A**, 2H, m, CH<sub>2</sub>, **B**), 1.45-1.37 (2H, m, CH<sub>2</sub>, **B**), 1.37-1.28 (2H, m, CH<sub>2</sub>, **A**), 0.93 (3H, t,  $J = 7.2$  Hz, CH<sub>3</sub>, **B**), 0.88 (3H, t,  $J = 7.2$  Hz, CH<sub>3</sub>, **A**).



**Isomer A:**  $^{13}\text{C}$  NMR (125 MHz, DMSO)  $\delta$  163.4, 159.5, 158.0, 157.1, 150.5, 138.2, 133.0, 128.1, 126.9, 125.4, 125.3, 122.9, 115.1, 112.3, 110.4, 109.1, 70.8, 59.4, 42.6, 30.7, 30.2, 26.3, 23.4, 22.0, 13.9. **Isomer B:**  $^{13}\text{C}$  NMR (125 MHz, DMSO)  $\delta$  163.1, 159.8, 157.3, 157.2, 150.3, 137.6, 130.1, 129.3, 126.8, 125.6, 124.7, 124.2, 114.9, 113.0, 110.9, 109.6, 71.0, 59.6, 46.5, 30.9, 30.4, 26.5, 23.4, 22.1, 13.9. HRMS ( $m/z$ ):  $[\text{M}+\text{H}]^+$  calcd. for  $\text{C}_{25}\text{H}_{28}\text{NO}_5$ , 422.1962; found, 422.1965; Elem. Anal. Calcd for  $\text{C}_{25}\text{H}_{31}\text{NO}_7$  (dihydrate): C, 65.63; H, 6.83; N 3.06. Found: C, 65.25; H, 6.46; N, 3.21.

**Scheme 4.** Synthesis of compounds **6-8**.

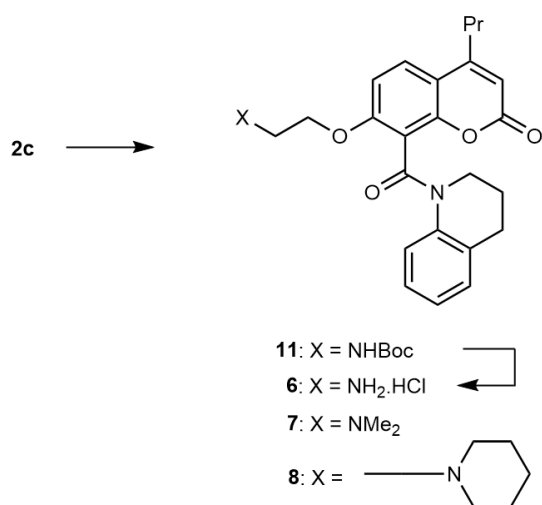

*Tert-Butyl* (2-((2-oxo-4-propyl-8-(1,2,3,4-tetrahydroquinolin-1-carbonyl)-2H-chromen-7-yl)oxy)ethyl)carbamate (**11**): *Tert*-Butyl (2-bromoethyl)carbamate (0.45 g, 2 mmol) was added to a suspension of compound **2c** (0.47 g, 1.3 mmol) and potassium carbonate (0.36 g, 2.6 mmol) in DMF (10 mL). The reaction mixture was heated to 130 °C for 24 h. After cooling, the reaction mixture was diluted with EtOAc (50 mL) and washed with water (3  $\times$  70 mL) and brine (1  $\times$  50 mL). The organic layer was dried over anhydrous sodium sulfate and concentrated under reduced pressure. Product **11** was purified by column chromatography (mobile phase: hexane/EtOAc, 1:1). Yield: 47% as a white solid; mp 73-74 °C as a dynamic equilibrium of *cis-trans* amide bond rotamers distinguishable by NMR in a ratio 2.4:1.  $^1\text{H}$  NMR (500 MHz, DMSO)  $\delta$  8.07 (1H, d,  $J$  = 8.7 Hz, CH, **B**), 7.88 (1H, d,  $J$  = 8.7 Hz, CH, **B**), 7.72 (1H, d,  $J$  = 9.0 Hz, CH, **A**), 7.24-7.16 (3H, m, CH, **B**), 7.14-7.08 (1H, m, CH, **A**, 1H, m, CH, **B**), 7.01 (1H, d,  $J$  = 9.0 Hz, CH, **A**), 6.94-6.86 (1H, NH, **A**, 1H, NH, **B**), 6.90 (1H, td overlapped,  $J$  = 7.7 Hz,  $J$  = 1.2 Hz, CH, **A**), 6.69 (1H, td,  $J$  = 7.7 Hz,  $J$  = 1.2 Hz, CH, **A**), 6.56 (1H, dd,  $J$  = 7.7 Hz,  $J$  = 1.2 Hz, CH, **A**), 6.23 (1H, s, CH, **B**), 6.09 (1H, s, CH, **A**), 4.27-4.13 (2H, m,  $\text{CH}_2$ , **B**), 4.08-4.00 (1H, m,  $\text{CH}_2$ , **A**), 4.00-3.89 (2H, m,  $\text{CH}_2$ , **A**), 3.86-3.78 (1H, m,  $\text{CH}_2$ , **A**), 3.42 (2H, t,  $J$  = 6.5 Hz,  $\text{CH}_2$ , **B**), 3.30-3.25 (2H, m,  $\text{CH}_2$ , **B**), 3.23-3.17 (2H, m,  $\text{CH}_2$ , **A**), 2.91-2.60 (4H, m,  $\text{CH}_2$ , **A**, 4H, m,  $\text{CH}_2$ , **B**), 2.16-2.25 (1H, m,  $\text{CH}_2$ , **A**), 1.99-1.83 (1H, m,  $\text{CH}_2$ , **A**, 2H, m,  $\text{CH}_2$ , **B**), 1.71-1.50 (2H, m,  $\text{CH}_2$ , **A**, 2H, m,  $\text{CH}_2$ , **B**), 1.36 (9H, s,  $\text{CH}_3$ , **A**), 1.35 (9H, s,  $\text{CH}_3$ , **B**), 0.99 (3H, t,  $J$  = 7.3 Hz,  $\text{CH}_3$ , **B**), 0.91 (3H, t,  $J$  = 7.3 Hz,  $\text{CH}_3$ , **A**). **Isomer A:**  $^{13}\text{C}$  NMR (125 MHz, DMSO)  $\delta$  163.2, 159.4, 157.5, 156.8, 155.8, 150.6, 138.2, 133.0, 128.1, 127.0, 125.4, 125.3, 122.8, 115.1, 112.5,

110.7, 108.9, 78.1, 67.5, 42.6, 39.2, 32.8, 28.3, 26.3, 23.4, 21.3, 13.7. **Isomer B:**  $^{13}\text{C}$  NMR (125 MHz, DMSO)  $\delta$  162.9, 159.7 156.9, 156.8, 155.7, 150.3, 137.6, 130.0, 129.2, 126.9, 125.5, 124.7, 124.3, 114.9, 113.2, 111.1, 109.4, 78.0, 67.5, 46.4, 39.4, 33.0, 28.3, 26.5, 23.5, 21.5, 13.9. HRMS ( $m/z$ ):  $[\text{M}+\text{H}]^+$  calcd. for  $\text{C}_{29}\text{H}_{35}\text{N}_2\text{O}_6$ , 507.2490; found, 507.2498; Elem. Anal. Calcd for  $\text{C}_{29}\text{H}_{34}\text{N}_2\text{O}_6$ : C, 68.76; H, 6.77; N, 5.53. Found: C, 68.55; H, 6.74; N, 5.44.

*2-((2-Oxo-4-propyl-8-(1,2,3,4-tetrahydroquinoline-1-carbonyl)-2H-chromen-7-yl)oxy)ethan-1-amine hydrochloride (6):* Compound **11** (0.4 g, 0.8 mmol) was dissolved in acetic acid (5 mL), bubbled with hydrogen chloride and stirred at RT for 2 h. The reaction mixture was diluted with diethyl ether (20 mL) and concentrated under reduced pressure. The product was dried over  $\text{P}_2\text{O}_5$  in a desiccator. Yield: 70% as a white solid; mp 129-130 °C as a dynamic equilibrium of *cis-trans* amide bond rotamers distinguishable by NMR in a ratio 2.7:1.  $^1\text{H}$  NMR (500 MHz, DMSO)  $\delta$  8.34 (3H, bs,  $\text{NH}_3$ , **A**, 3H, bs,  $\text{NH}_3$ , **B**), 8.12 (1H, d,  $J = 8.6$  Hz, CH, **B**), 7.91 (1H, d,  $J = 8.6$  Hz, CH, **B**), 7.77 (1H, d,  $J = 9.0$  Hz, CH, **A**), 7.28 (1H, d,  $J = 9.1$  Hz, CH, **B**), 7.24-7.18 (2H, m, CH, **B**), 7.12 (1H, d,  $J = 9.0$  Hz, CH, **A**), 7.11-7.07 (1H, m, CH, **A**, 1H, m, CH, **B**), 6.91 (1H, t,  $J = 7.7$  Hz, CH, **A**), 6.70 (1H, t,  $J = 7.7$  Hz, CH, **A**), 6.56 (1H, d,  $J = 7.7$  Hz, CH, **A**), 6.26 (1H, s, CH, **B**), 6.08 (1H, s, CH, **A**), 4.43 (2H, d,  $J = 5.7$  Hz, CH, **B**), 4.40-4.32 (1H, m,  $\text{CH}_2$ , **A**), 4.27-4.20 (1H, m,  $\text{CH}_2$ , **A**), 4.20-4.11 (1H, m,  $\text{CH}_2$ , **A**), 3.71-3.63 (1H, m,  $\text{CH}_2$ , **A**), 3.51-3.41 (2H, m,  $\text{CH}_2$ , **B**), 3.20-3.08 (2H, m,  $\text{CH}_2$ , **A**, 2H, m,  $\text{CH}_2$ , **B**), 2.95-2.59 (4H, m,  $\text{CH}_2$ , **A**, 4H, m,  $\text{CH}_2$ , **B**), 2.23-2.12 (1H, m,  $\text{CH}_2$ , **A**), 1.96-1.83 (1H, m,  $\text{CH}_2$ , **A**, 2H, m,  $\text{CH}_2$ , **B**), 1.72-1.48 (2H, m,  $\text{CH}_2$ , **A**, 2H, m,  $\text{CH}_2$ , **B**), 0.99 (3H, t,  $J = 7.3$  Hz,  $\text{CH}_3$ , **B**), 0.90 (3H, t,  $J = 7.3$  Hz,  $\text{CH}_3$ , **A**). **Isomer A:**  $^{13}\text{C}$  NMR (125 MHz, DMSO)  $\delta$  163.2, 159.2 157.3, 156.6, 150.2, 138.1, 133.2, 128.1, 127.2, 125.5, 125.3, 123.1, 115.5, 113.1, 111.0, 109.9, 66.1, 42.8, 38.0, 32.8, 26.3, 23.4, 21.3, 13.7. **Isomer B:**  $^{13}\text{C}$  NMR (125 MHz, DMSO)  $\delta$  162.8, 159.6 156.9, 156.4, 150.2, 137.6, 130.1, 129.3, 127.0, 125.6, 124.8, 124.3, 115.3, 113.7, 111.4, 110.2, 66.2, 46.5, 38.1, 33.0, 26.6, 23.4, 21.5, 13.9. HRMS ( $m/z$ ):  $[\text{M}+\text{H}]^+$  calcd. for  $\text{C}_{24}\text{H}_{27}\text{N}_2\text{O}_4$ , 407.1965; found, 407.1978; Elem. Anal. Calcd for  $\text{C}_{24}\text{H}_{27}\text{ClN}_2\text{O}_4$ : C, 65.08; H, 6.14; N, 6.32. Found: C, 64.88; H, 6.17; N, 6.24.

*7-(2-(Dimethylamino)ethoxy)-4-propyl-8-(1,2,3,4-tetrahydroquinolin-1-carbonyl)-2H-chromen-2-one (7):* 2-Chloro-*N,N*-dimethylethan-1-amine hydrochloride (0.18 g, 1.25 mmol) was added to a suspension of compound **2c** (0.3 g, 0.82 mmol) and potassium carbonate (0.23 g, 1.64 mmol) in DMF (10 mL). The reaction mixture was heated to 130 °C for 24 h. After cooling to RT, the reaction mixture was diluted with EtOAc (50 mL) and washed with water ( $3 \times 50$  mL) and brine ( $1 \times 50$  mL). The organic layer was dried over anhydrous sodium sulfate and concentrated under reduced pressure. Product **7** was suspended with diethyl ether (15 mL), filtered off and obtained in high quality without additional purification. Yield: 74% as a white solid; mp 128-129 °C as a dynamic equilibrium of *cis-trans* amide bond rotamers distinguishable by NMR in a ratio 2:1.  $^1\text{H}$  NMR (500 MHz, DMSO)  $\delta$  8.06-8.03 (1H, m, CH, **B**), 7.86 (1H, d,  $J = 8.4$  Hz, CH, **B**), 7.71 (1H, d,  $J = 9.3$  Hz, CH, **A**), 7.23-7.18 (3H, m, CH, **B**), 7.13-7.06 (1H, m, CH, **A**, 1H, m, CH, **B**), 7.01 (1H, d,  $J = 9.1$  Hz, CH, **A**), 6.90 (1H, dt,  $J = 7.7$  Hz,  $J = 1.0$  Hz, CH, **A**), 6.69 (1H, dt,  $J = 7.7$  Hz,  $J = 1.0$  Hz, CH, **A**), 6.59 (1H, dd,  $J = 7.7$  Hz,  $J = 0.9$  Hz, CH, **A**), 6.22 (1H, s, CH, **B**), 6.09 (1H, s, CH, **A**), 4.30-4.21 (2H, m,  $\text{CH}_2$ , **B**), 4.18-4.10 (1H, m,  $\text{CH}_2$ , **A**), 4.01-3.89 (1H, m,  $\text{CH}_2$ , **A**, 1H, m,  $\text{CH}_2$ , **A**), 3.88-3.81 (1H, m,  $\text{CH}_2$ , **A**), 3.50-3.30 (2H, m,  $\text{CH}_2$ , **B**), 2.91-2.57 (4H, m,  $\text{CH}_2$ , **A**, 6H, m,  $\text{CH}_2$ , **B**), 2.53-2.48 (2H, m,  $\text{CH}_2$ , **A**), 2.18 (6H, s,  $\text{CH}_3$ , **B**), 2.15 (6H, s,  $\text{CH}_3$ , **A**), 2.14-2.05 (1H, m,  $\text{CH}_2$ , **A**), 2.00-1.83 (1H, m,  $\text{CH}_2$ , **A**, 2H, m,  $\text{CH}_2$ , **B**), 1.71-1.50 (2H, m,  $\text{CH}_2$ , **A**, 2H, m,  $\text{CH}_2$ , **B**), 0.99 (3H, t,  $J = 7.4$  Hz,  $\text{CH}_3$ , **B**), 0.92

(3H, t,  $J = 7.2$  Hz, CH<sub>3</sub>, **A**). **Isomer A**: <sup>13</sup>C NMR (125 MHz, DMSO)  $\delta$  163.3, 159.5, 157.6, 156.8, 150.6, 138.2, 132.9, 128.2, 126.9, 125.4, 125.3, 122.8, 115.0, 112.4, 110.6, 108.9, 67.2, 57.4, 45.8, 45.7, 32.8, 26.4, 23.3, 21.3, 13.7. **Isomer B**: <sup>13</sup>C NMR (125 MHz, DMSO)  $\delta$  163.1, 159.7, 157.0, 156.9, 150.2, 137.5, 130.0, 129.3, 126.9, 125.6, 124.7, 124.1, 114.8, 113.0, 111.0, 109.2, 67.8, 57.6, 46.5, 42.6, 33.0, 26.5, 23.4, 21.5, 13.9. HRMS ( $m/z$ ):  $[M+H]^+$  calcd. for C<sub>26</sub>H<sub>31</sub>N<sub>2</sub>O<sub>4</sub>, 435.2278; found, 435.2285; Elem. Anal. Calcd for C<sub>26</sub>H<sub>30</sub>N<sub>2</sub>O<sub>4</sub>: C, 71.87; H, 6.96; N, 6.45. Found: C, 71.92; H, 6.57; N, 6.18.

**7-(3-(Piperidin-1-yl)propoxy)-4-propyl-8-(1,2,3,4-tetrahydroquinolin-1-carbonyl)-2H-chromen-2-one (8)**: 1-(3-Chloropropyl)piperidine hydrochloride (0.25 g, 1.26 mmol) was added to a suspension of compound **2c** (0.3 g, 0.82 mmol) and potassium carbonate (0.23 g, 1.64 mmol) in DMF (10 mL). The reaction mixture was heated to 130 °C for 24 h. After cooling to RT, the reaction mixture was diluted with EtOAc (50 mL) and washed with water (3  $\times$  50 mL) and brine (1  $\times$  50 mL). The organic layer was dried over anhydrous sodium sulfate and concentrated under reduced pressure. Product **8** was suspended with diethyl ether (15 mL), filtered off and obtained in high quality without additional purification. Yield: 98% as a white solid; mp 154-155 °C as a dynamic equilibrium of *cis-trans* amide bond rotamers distinguishable by NMR in a ratio 2:1. <sup>1</sup>H NMR (500 MHz, DMSO)  $\delta$  8.09-8.05 (1H, m, CH, **B**), 7.86 (1H, d,  $J = 9.0$  Hz, CH, **B**), 7.71 (1H, d,  $J = 9.0$  Hz, CH, **A**), 7.23-7.17 (3H, m, CH, **B**), 7.13-7.06 (1H, m, CH, **A**, 1H, m, CH, **B**), 6.98 (1H, d,  $J = 9.0$  Hz, CH, **A**), 6.90 (1H, dt,  $J = 7.8$  Hz,  $J = 1.4$  Hz, CH, **A**), 6.69 (1H, t,  $J = 7.8$  Hz, CH, **A**), 6.54 (1H, d,  $J = 7.8$  Hz, CH, **A**), 6.22 (1H, s, CH, **B**), 6.09 (1H, s, CH, **A**), 4.19 (2H, t,  $J = 6.2$ , CH<sub>2</sub>, **B**), 4.11-4.05 (1H, m, CH<sub>2</sub>, **A**), 3.99-3.90 (1H, m, CH<sub>2</sub>, **A**, 1H, m **A**), 3.88-3.81 (1H, m, CH<sub>2</sub>, **A**), 3.51-3.44 (1H, m, CH<sub>2</sub>, **B**), 3.40-3.31 (1H, m, CH<sub>2</sub>, **B**), 2.93-2.59 (4H, m, CH<sub>2</sub>, **A**, 4H, m, CH<sub>2</sub>, **B**), 2.37-2.15 (6H, m, CH<sub>2</sub>, **A**, 6H, m, CH<sub>2</sub>, **B**), 2.15-2.05 (1H, m, CH<sub>2</sub>, **A**), 2.01-1.91 (1H, m, CH<sub>2</sub>, **A**), 1.91-1.51 (4H, m, CH<sub>2</sub>, **A**, 6H, m, CH<sub>2</sub>, **B**), 1.51-1.25 (6H, m, CH<sub>2</sub>, **A**, 6H, m, CH<sub>2</sub>, **B**), 0.99 (3H, t,  $J = 7.4$  Hz, CH<sub>3</sub>, **B**), 0.92 (3H, t,  $J = 7.2$  Hz, CH<sub>3</sub>, **A**). **Isomer A**: <sup>13</sup>C NMR (125 MHz, DMSO)  $\delta$  163.3, 159.5, 157.7, 156.8, 150.6, 138.2, 132.9, 128.2, 126.9, 125.4, 125.3, 122.7, 115.0, 112.3, 110.5, 108.9, 67.2, 54.7, 54.2, 42.6, 32.8, 26.4, 26.1, 25.8, 24.3, 23.4, 21.3, 13.7. **Isomer B**: <sup>13</sup>C NMR (125 MHz, DMSO)  $\delta$  163.1, 159.7, 157.2, 156.9, 150.2, 137.5, 129.9, 129.3, 126.9, 125.6, 124.7, 124.0, 114.8, 113.0, 110.9, 109.3, 67.3, 54.9, 54.2, 46.5, 33.0, 26.5, 26.3, 25.7, 24.2, 23.5, 21.5, 13.9. HRMS ( $m/z$ ):  $[M+H]^+$  calcd. for C<sub>30</sub>H<sub>37</sub>N<sub>2</sub>O<sub>4</sub>, 489.2748; found, 489.2750; Elem. Anal. Calcd for C<sub>30</sub>H<sub>36</sub>N<sub>2</sub>O<sub>4</sub>: C, 73.74; H, 7.43; N, 5.73. Found: C, 73.90; H, 7.40; N, 5.71.

#### Scheme 5. Synthesis of topobexin (**9**).

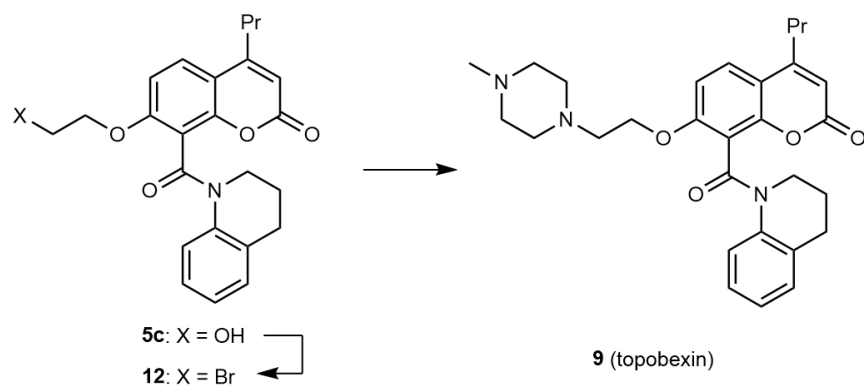

*7-(2-Bromoethoxy)-4-propyl-8-(1,2,3,4-tetrahydroquinolin-1-carbonyl)-2H-chromen-2-one* (**12**):

Tetrabromomethane (0.53 g, 1.6 mmol) was added to a solution of compound **5c** (0.5 g, 1.23 mmol) and triphenylphosphine (0.42 g, 1.6 mmol) in acetonitrile (50 mL). The reaction mixture was stirred at RT for 48 h. Then, the reaction mixture was concentrated under reduced pressure. The product **12** was purified by column chromatography (mobile phase: hexane/EtOAc, 2:1). Yield: 52% as a white solid; mp 128-129 °C as a dynamic equilibrium of *cis-trans* amide bond rotamers distinguishable by NMR in a ratio 1.6:1. <sup>1</sup>H NMR (500 MHz, DMSO) δ 8.09 (1H, d, *J* = 8.5 Hz, CH, **B**), 7.87 (1H, d, *J* = 8.5 Hz, CH, **B**), 7.73 (1H, d, *J* = 9.0 Hz, CH, **A**), 7.24-7.18 (3H, m, CH, **B**), 7.13-7.07 (1H, m, CH, **A**, 1H, m, CH, **B**), 7.02 (1H, d, *J* = 9.0 Hz, CH, **A**), 6.90 (1H, td, *J* = 7.6 Hz, *J* = 1.3 Hz, CH, **A**), 6.72-6.67 (1H, m, CH, **A**), 6.65 (1H, dd, *J* = 7.6 Hz, *J* = 1.3 Hz CH, **A**), 6.24 (1H, s, CH, **B**), 6.10 (1H, s, CH, **A**), 4.59-4.27 (2H, m, CH<sub>2</sub>, **A**, 2H, m, CH<sub>2</sub>, **B**), 4.05-3.97 (1H, m, CH<sub>2</sub>, **A**), 3.84-3.66 (3H, m, CH<sub>2</sub>, **A**, 2H, m, CH<sub>2</sub>, **B**), 3.49-3.42 (2H, m, CH<sub>2</sub>, **B**), 2.93-2.59 (4H, m, CH<sub>2</sub>, **A**, 4H, m, CH<sub>2</sub>, **B**), 2.18-2.07 (1H, m CH<sub>2</sub>, **A**), 2.02-1.81 (1H, m CH<sub>2</sub>, **A**, 2H, m CH<sub>2</sub>, **B**), 1.72-1.49 (2H, m CH<sub>2</sub>, **A**, 2H, m CH<sub>2</sub>, **B**), 0.99 (3H, t, *J* = 7.4 Hz, CH<sub>3</sub>, **B**), 0.91 (3H, t, *J* = 7.3 Hz, CH<sub>3</sub>, **A**). **Isomer A**: <sup>13</sup>C NMR (125 MHz, DMSO) δ 163.0, 159.4 157.0, 156.7, 150.5, 138.2, 132.9, 128.2, 126.9, 125.4, 125.3, 122.9, 115.2, 112.8, 110.8, 109.0, 69.0, 42.7, 32.8, 30.8, 26.3, 23.4, 21.3, 13.7. **Isomer B**: <sup>13</sup>C NMR (125 MHz, DMSO) δ 162.8, 159.7 156.9, 156.3, 150.2, 137.5, 130.1, 129.2, 126.1, 125.6, 124.7, 124.2, 115.0, 113.4, 111.2, 109.5, 69.0, 46.5, 33.0, 31.3, 26.5, 23.5, 21.5, 13.9. HRMS (*m/z*): [M+H]<sup>+</sup> calcd. for C<sub>24</sub>H<sub>25</sub>BrNO<sub>4</sub>, 470.0961; found, 470.0970; Elem. Anal. Calcd for C<sub>24</sub>H<sub>24</sub>BrNO<sub>4</sub>: C, 61.29; H, 5.14; N 2.98. Found: C, 61.47; H, 5.02; N 2.92.

*7-(2-(4-Methylpiperazin-1-yl)ethoxy)-4-propyl-8-(1,2,3,4-tetrahydroquinolin-1-carbonyl)-2H-chromen-2-one* (**9**, *topobexin*):

1-Methylpiperazine (0.18 g, 0.2 mL, 1.8 mmol) was added to a suspension of compound **12** (0.28 g, 0.6 mmol) and potassium carbonate (0.25 g, 1.8 mmol) in DMF (5 mL). The reaction mixture was heated to 60 °C for 5 h. After cooling, the reaction mixture was diluted with EtOAc (50 mL) and washed with water (3 × 70 mL) and brine (1 × 50 mL). The organic layer was dried over anhydrous sodium sulfate and concentrated under reduced pressure. Product **9** was suspended with diethyl ether (10 mL), filtered off and obtained in high quality without additional purification. Yield: 78% as a white solid; mp 45-46 °C as a dynamic equilibrium of *cis-trans* amide bond rotamers distinguishable by NMR in a ratio 1.7:1.

<sup>1</sup>H NMR (500 MHz, DMSO) δ 8.09-8.00 (1H, m, CH, **B**), 7.86 (1H, d, *J* = 9.0 Hz, CH, **B**), 7.71 (1H, d, *J* = 9.0 Hz, CH, **A**), 7.23-7.17 (3H, m, CH, **B**), 7.13-7.07 (1H, m, CH, **A**, 1H, m, CH, **B**), 7.01 (1H, d, *J* = 9.0 Hz, CH, **A**), 6.90 (1H, td, *J* = 7.8 Hz, *J* = 1.3 Hz, CH, **A**), 6.69 (1H, td, *J* = 7.8 Hz, *J* = 1.3 Hz, CH, **A**), 6.59 (1H, dd, *J* = 7.8 Hz, *J* = 1.3 Hz, CH, **A**), 6.22 (1H, s, CH, **B**), 6.08 (1H, s, CH, **A**), 4.31-4.20 (2H, m, CH<sub>2</sub>, **B**), 4.20-4.13 (1H, m, CH<sub>2</sub>, **A**), 4.05-3.93 (2H, m, CH<sub>2</sub>, **A**), 3.83-3.76 (1H, m, CH<sub>2</sub>, **A**), 3.51-3.43 (1H, m, CH<sub>2</sub>, **B**), 3.43-3.36 (1H, m, CH<sub>2</sub>, **B**), 2.91-2.54 (6H, m, CH<sub>2</sub>, **A**, 6H, m, CH<sub>2</sub>, **B**), 2.48-2.34 (4H, m, CH<sub>2</sub>, **A**, 4H, m, CH<sub>2</sub>, **B**), 2.34-2.21 (4H, m, CH<sub>2</sub>, **A**, 4H, m, CH<sub>2</sub>, **B**), 2.11 (3H, s, CH<sub>3</sub>, **A**), 2.06 (3H, s, CH<sub>3</sub>, **B**), 2.00-1.82 (2H, m CH<sub>2</sub>, **A**, 2H, m CH<sub>2</sub>, **B**), 1.71-1.62 (2H, m CH<sub>2</sub>, **B**), 1.62-1.50 (2H, m CH<sub>2</sub>, **A**), 0.99 (3H, t, *J* = 7.3 Hz, CH<sub>3</sub>, **B**), 0.91 (3H, t, *J* = 7.3 Hz, CH<sub>3</sub>, **A**).

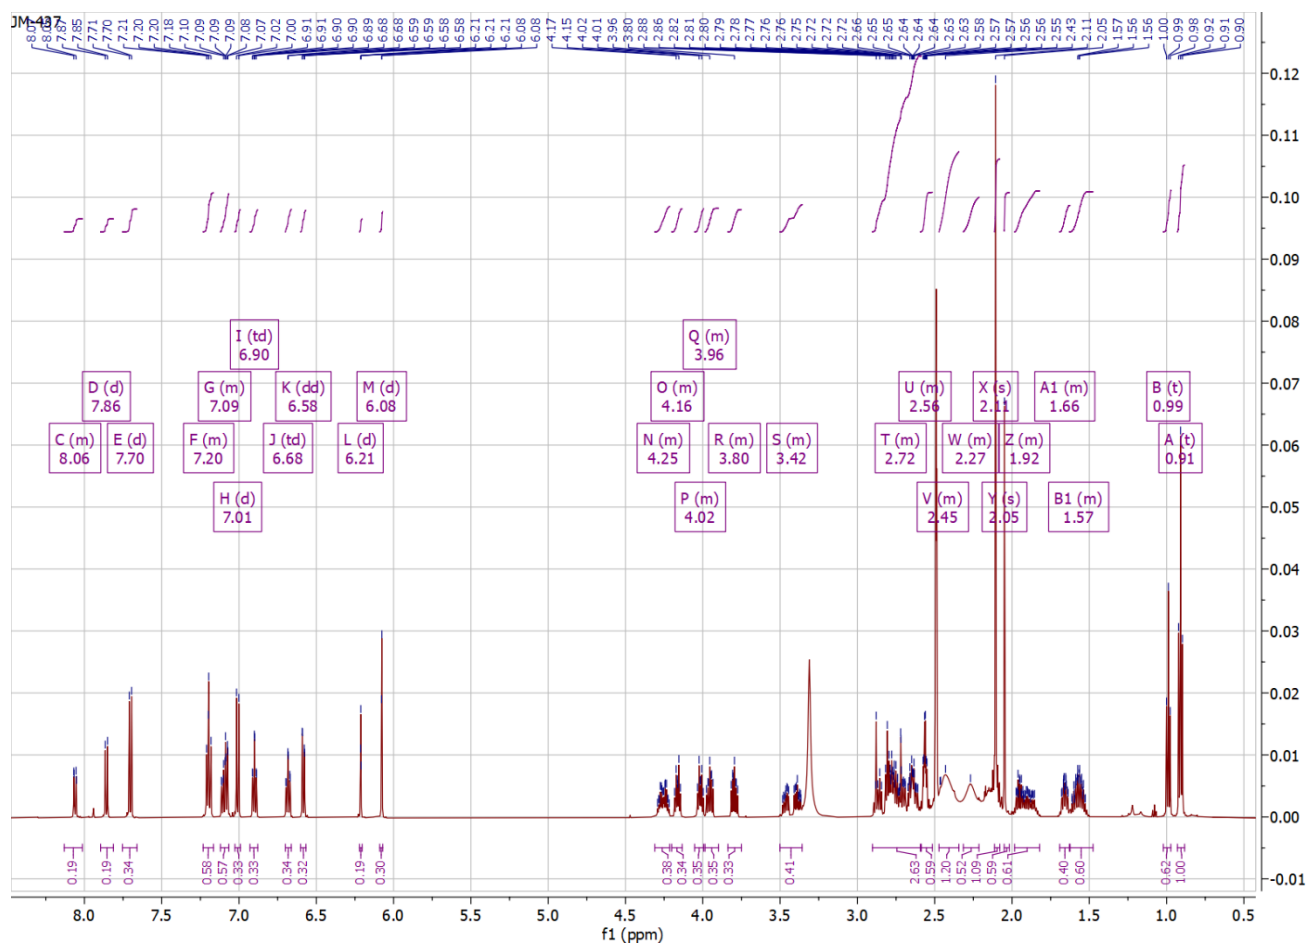

**Isomer A:**  $^{13}\text{C}$  NMR (125 MHz, DMSO)  $\delta$  163.3, 159.5, 157.6, 156.8, 150.6, 138.2, 133.0, 128.2, 126.9, 125.4, 125.3, 122.8, 115.0, 112.4, 110.6, 109.0, 67.0, 56.3, 54.9, 53.2, 45.9, 42.6, 32.8, 26.4, 23.4, 21.3, 13.7. **Isomer B:**  $^{13}\text{C}$  NMR (125 MHz, DMSO)  $\delta$  163.1, 159.7, 157.0, 156.9, 150.2, 137.5, 129.9, 129.3, 126.9, 125.6, 124.6, 124.0, 114.8, 113.0, 111.0, 109.2, 67.7, 56.5, 54.8, 53.2, 46.5, 45.9, 33.0, 26.6, 23.4, 21.5, 13.9.

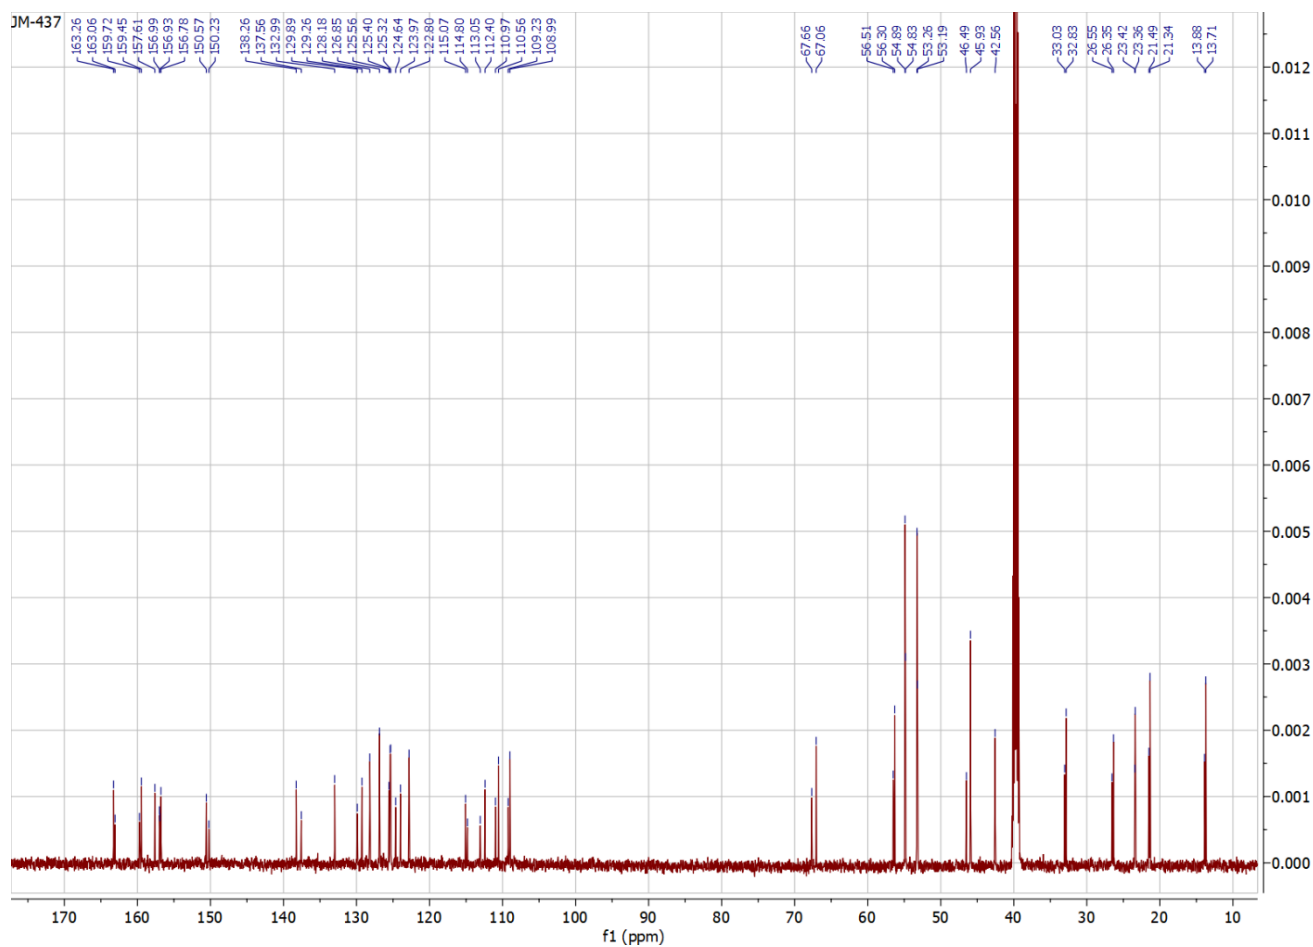

HRMS (m/z):  $[M+H]^+$  calcd. for  $C_{29}H_{36}N_3O_4$ , 490.2700; found, 490.2708.

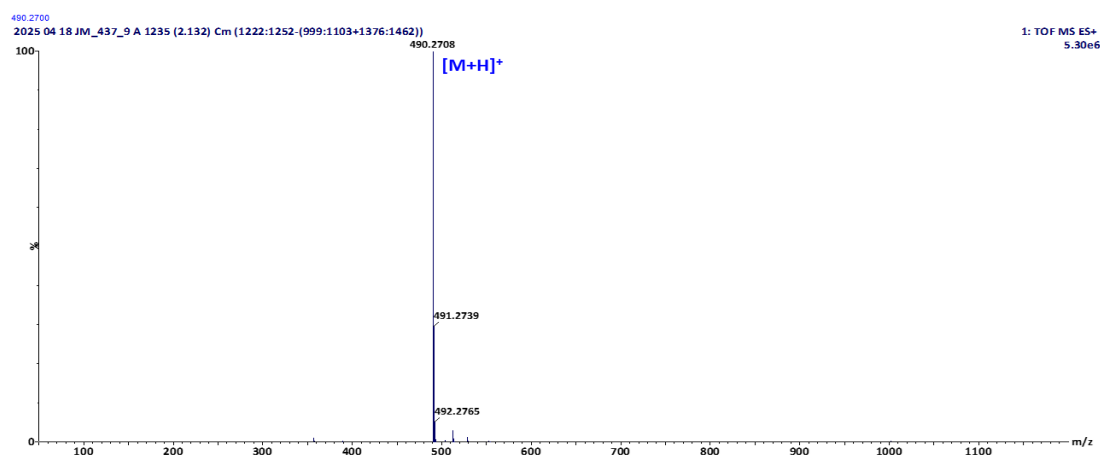

Elem. Anal. Calcd for  $C_{29}H_{35}N_3O_4$ : C, 71.14; H, 7.21; N 8.58. Found: C, 71.06; H, 7.32; N 8.50.

**Scheme 6.** Synthesis of compound **14**.

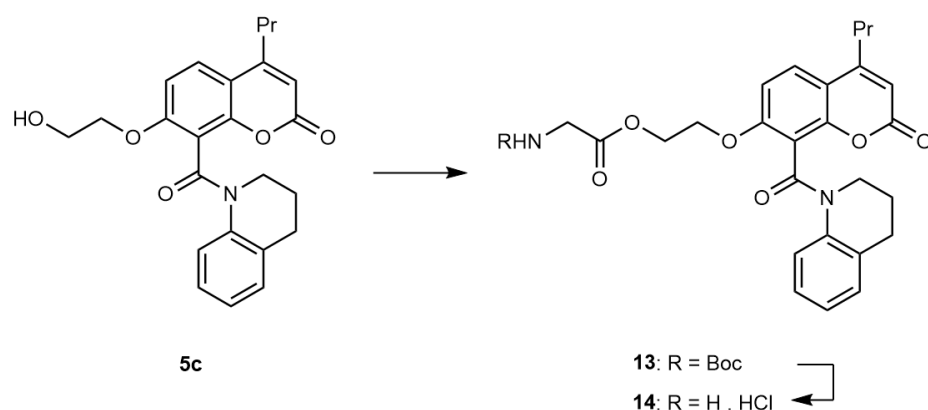

2-((2-Oxo-4-propyl-8-(1,2,3,4-tetrahydroquinoline-1-carbonyl)-2H-chromen-7-yl)oxy)ethyl (tert-butoxycarbonyl)glycinate (**13**): EDC.HCl (1.41 g, 7.4 mmol) was added to the solution of compound **5c** (1.00 g, 2.4 mmol), (tert-butoxycarbonyl)glycine (1.29 g, 7.4 mmol) and DMAP (0.015 g, 0.1 mmol) in CH<sub>2</sub>Cl<sub>2</sub> (15 mL). The reaction mixture was stirred under inert atmosphere at RT for 24 h. After completion, the reaction mixture was filtered off, filtrate was washed with 1 % aq. HCl (50 mL), water (50 mL), brine (50 mL) and water (50 mL). Organic layer was separated, dried over anhydrous sodium sulfate and evaporated under reduced pressure. The product was purified using column chromatography (mobile phase: hexane/EtOAc, 2:3). Yield: 87 % as a white solid; mp 94-95 °C as a dynamic equilibrium of *cis-trans* amide bond rotamers distinguishable by NMR in a ratio 2.3:1. <sup>1</sup>H NMR (600 MHz, DMSO-*d*<sub>6</sub>) δ 8.02 (1H, d, *J* = 6.8 Hz, CH, **B**), 7.84 (1H, d, *J* = 7.5 Hz, CH, **B**), 7.69 (1H, d, *J* = 9.0 Hz, CH, **A**), 7.22-7.13 (3H, m, CH, **B**), 7.10-7.04 (1H, m, CH, **A**, 1H, m, CH, **B**), 6.99 (1H, d, *J* = 9.0 Hz, CH, **A**), 6.87 (1H, td, *J* = 7.3 Hz, *J* = 1.2 Hz, CH, **A**), 6.68 (1H, td, *J* = 7.3 Hz, *J* = 1.2 Hz, CH, **A**), 6.55 (1H, d, *J* = 7.3 Hz, CH, **A**), 6.20 (1H, s, CH, **B**), 6.07 (1H, s, CH, **A**), 4.44-4.32 (4H, m, CH<sub>2</sub>, **B**), 4.32-4.21 (3H, m, CH<sub>2</sub>, **A**), 4.19-4.12 (1H, m, CH<sub>2</sub>, **A**), 3.97-3.89 (1H, m, CH<sub>2</sub>, **A**), 3.84-3.75 (1H, m, CH<sub>2</sub>, **A**), 3.64 (2H, d, *J* = 5.1 Hz, CH<sub>2</sub>, **A**), 3.62-3.50 (2H, m, CH<sub>2</sub>, **B**), 3.42-3.37 (2H, m, CH<sub>2</sub>, **B**), 2.90-2.54 (4H, m, CH<sub>2</sub>, **A**, 4H, m, CH<sub>2</sub>, **B**), 2.13-2.03 (1H, m, CH<sub>2</sub>, **A**), 1.97-1.79 (1H, m, CH<sub>2</sub>, **A**, 2H, m, CH<sub>2</sub>, **B**), 1.69-1.46 (2H, m, CH<sub>2</sub>, **A**, 2H, m, CH<sub>2</sub>, **B**), 1.34 (9H, s, CH<sub>3</sub>, **A**), 1.32 (9H, s, CH<sub>3</sub>, **B**), 0.96 (3H, t, *J* = 7.3 Hz, CH<sub>3</sub>, **B**), 0.89 (3H, t, *J* = 7.3 Hz, CH<sub>3</sub>, **A**). **Isomer A**: <sup>13</sup>C NMR (150 MHz, DMSO-*d*<sub>6</sub>) δ 170.5, 163.1, 159.4, 157.2, 156.7, 155.9, 150.5, 138.2, 133.0, 128.2, 126.9, 125.4, 125.4, 122.7, 115.5, 112.7, 110.8, 109.1, 78.4, 67.1, 62.8, 42.6, 41.9, 32.8, 28.3, 26.2, 23.4, 21.3, 13.7. **Isomer B**: <sup>13</sup>C NMR (150 MHz, DMSO-*d*<sub>6</sub>) δ 170.4, 162.8, 159.6, 156.8, 156.6, 155.9, 150.2, 137.5, 130.0, 129.3, 126.9, 125.6, 124.7, 124.1, 115.0, 113.4, 111.2, 109.5, 78.4, 67.2, 62.9, 46.4, 41.8, 33.0, 28.3, 26.4, 23.4, 21.5, 13.9. HRMS (*m/z*): [M+H]<sup>+</sup> calcd. for C<sub>31</sub>H<sub>37</sub>N<sub>2</sub>O<sub>8</sub>, 565.2544; found, 565.2548; Elem. Anal. Calcd. for C<sub>31</sub>H<sub>36</sub>N<sub>2</sub>O<sub>8</sub>: C, 65.94; H, 6.43; N, 4.96. Found: C, 65.76; H, 6.29; N, 4.62.

2-Oxo-2-(2-((2-oxo-4-propyl-8-(1,2,3,4-tetrahydroquinoline-1-carbonyl)-2H-chromen-7-yl)oxy)ethoxy)ethan-1-aminium chloride (**14**): Compound **13** (0.50 g, 0.9 mmol) was dissolved in acetic acid (5 mL), bubbled with hydrogen chloride for 5 min and the reaction mixture was stirred at RT for additional 2 h. Diethyl ester (25 mL) was added and the formed solid was filtered off and dried under reduced pressure. Yield: 81 % yield as a white solid; mp 119-120 °C as a dynamic equilibrium of *cis-trans*

amide bond rotamers distinguishable by NMR in a ratio 2.4:1.  $^1\text{H}$  NMR (500 MHz,  $\text{DMSO-}d_6$ )  $\delta$  8.51 (3H, bs,  $-(\text{NH}_3)^+$ , **A**, 3H, bs,  $-(\text{NH}_3)^+$ , **B**), 8.06 (1H, d,  $J = 8.8$  Hz, CH, **B**), 7.89 (1H, d,  $J = 8.8$  Hz, CH, **B**), 7.74 (1H, d,  $J = 9.0$  Hz, CH, **A**), 7.28-7.19 (3H, m, CH, **B**), 7.14-7.04 (1H, m, CH, **A**, 1H, m, CH, **B**), 7.06 (1H, d,  $J = 9.0$  Hz, CH, **A**), 6.92 (1H, t,  $J = 7.4$  Hz, CH, **A**), 6.72 (1H, t,  $J = 7.4$  Hz, CH, **A**), 6.59 (1H, d,  $J = 7.4$  Hz, CH, **A**), 6.24 (1H, s, CH, **B**), 6.10 (1H, s, CH, **A**), 4.51-4.32 (3H, m,  $\text{CH}_2$ , **A**, 4H, m,  $\text{CH}_2$ , **B**), 4.28-4.21 (1H, m,  $\text{CH}_2$ , **A**), 4.07-3.98 (1H, m,  $\text{CH}_2$ , **A**), 3.81-3.71 (1H, m,  $\text{CH}_2$ , **A**), 3.77 (2H, s,  $\text{CH}_2$ , **A**), 3.66 (2H, s,  $\text{CH}_2$ , **B**), 3.47-3.39 (2H, m,  $\text{CH}_2$ , **B**), 2.93-2.58 (4H, m,  $\text{CH}_2$ , **A**, 4H, m,  $\text{CH}_2$ , **B**), 2.20-2.07 (1H, m,  $\text{CH}_2$ , **A**), 1.98-1.85 (1H, m,  $\text{CH}_2$ , **A**, 2H, m,  $\text{CH}_2$ , **B**), 1.71-1.49 (2H, m,  $\text{CH}_2$ , **A**, 2H, m,  $\text{CH}_2$ , **B**), 0.99 (3H, t,  $J = 7.2$  Hz,  $\text{CH}_3$ , **B**), 0.91 (3H, t,  $J = 7.5$  Hz,  $\text{CH}_3$ , **A**). **Isomer A:**  $^{13}\text{C}$  NMR (125 MHz,  $\text{DMSO-}d_6$ )  $\delta$  167.8, 163.2, 159.4, 157.3, 156.8, 150.4, 138.2, 133.1, 128.2, 127.0, 125.6, 125.4, 122.8, 115.3, 112.8, 110.8, 109.3, 67.0, 63.7, 42.7, 39.8, 32.8, 26.3, 23.4, 21.3, 13.7. **Isomer B:**  $^{13}\text{C}$  NMR (125 MHz,  $\text{DMSO-}d_6$ )  $\delta$  167.8, 162.9, 159.7, 156.9, 156.5, 150.2, 137.5, 130.1, 129.4, 127.0, 125.7, 124.8, 124.1, 115.1, 113.5, 111.3, 109.7, 67.2, 63.9, 46.5, 39.7, 33.1, 26.5, 23.4, 21.5, 13.9. HRMS ( $m/z$ ):  $[\text{M}+\text{H}]^+$  calcd. for  $\text{C}_{26}\text{H}_{29}\text{N}_2\text{O}_6$ , 465.2020; found, 465.2032; Elem. Anal. Calcd. for  $\text{C}_{26}\text{H}_{29}\text{ClN}_2\text{O}_6$ : C, 62.34; H, 5.84; N, 5.59. Found: C, 62.02; H, 5.62; N, 5.29.
